# Supplementary material for: Indoles via Knoevenagel–Hemetsberger reaction sequence
Source: Royal Society of Chemistry journal article supplement (doi:10.1039/c3ra42296h), 2013-01-01

## Supplementary Information

### Table of Contents

|                                                                                                                                                                    |      |
|--------------------------------------------------------------------------------------------------------------------------------------------------------------------|------|
| <b><u>Section 1:</u></b> $^1\text{H}$ , $^{13}\text{C}$ , and $^1\text{H}$ - $^{13}\text{C}$ -coupled NMR of ethyl $\alpha$ -azido- $\beta$ -arylacrylates (2a-2j) | p 2  |
| <b><u>Section 2:</u></b> NMR and MS of (Z)-ethyl 2-(3-nitrobenzamido)-3-(3-nitrophenyl)acrylate                                                                    | p 37 |
| <b><u>Section 3:</u></b> NMR (1-D and 2-D) of diethyl 1,6-dihydropyrrolo[2,3-e]indole-2,7-dicarboxylate, 3j                                                        | p 40 |
| <b><u>Section 4:</u></b> DSC of ethyl azidoacetate (1) and ethyl $\alpha$ -azido- $\beta$ -arylacrylates (2a-2j)                                                   | p 48 |

### Experimental.

Nuclear magnetic resonance spectra were measured on a 400 MHz Varian (1-D measurements) and a Bruker AVIII HD 500 MHz (2-D measurements); chloroform-d was used as the solvent except where noted otherwise. Mass spectrometry measurements were performed by electron impact (EI) on a Micromass (Waters) Autospec M. Differential scanning calorimetry experiments were performed on a TA Instruments Q20 in hermetic pan/lid; samples were heated at a rate of 10°C/minute.

## Section 1:

### $^1\text{H}$ , $^{13}\text{C}$ , and $^1\text{H}$ - $^{13}\text{C}$ -coupled NMR spectroscopies of ethyl $\alpha$ -azido- $\beta$ -arylacrylates (2a-2j)

#### $^1\text{H}$ NMR: (Z)-Ethyl $\alpha$ -azido- $\beta$ -phenylacrylate (2a)

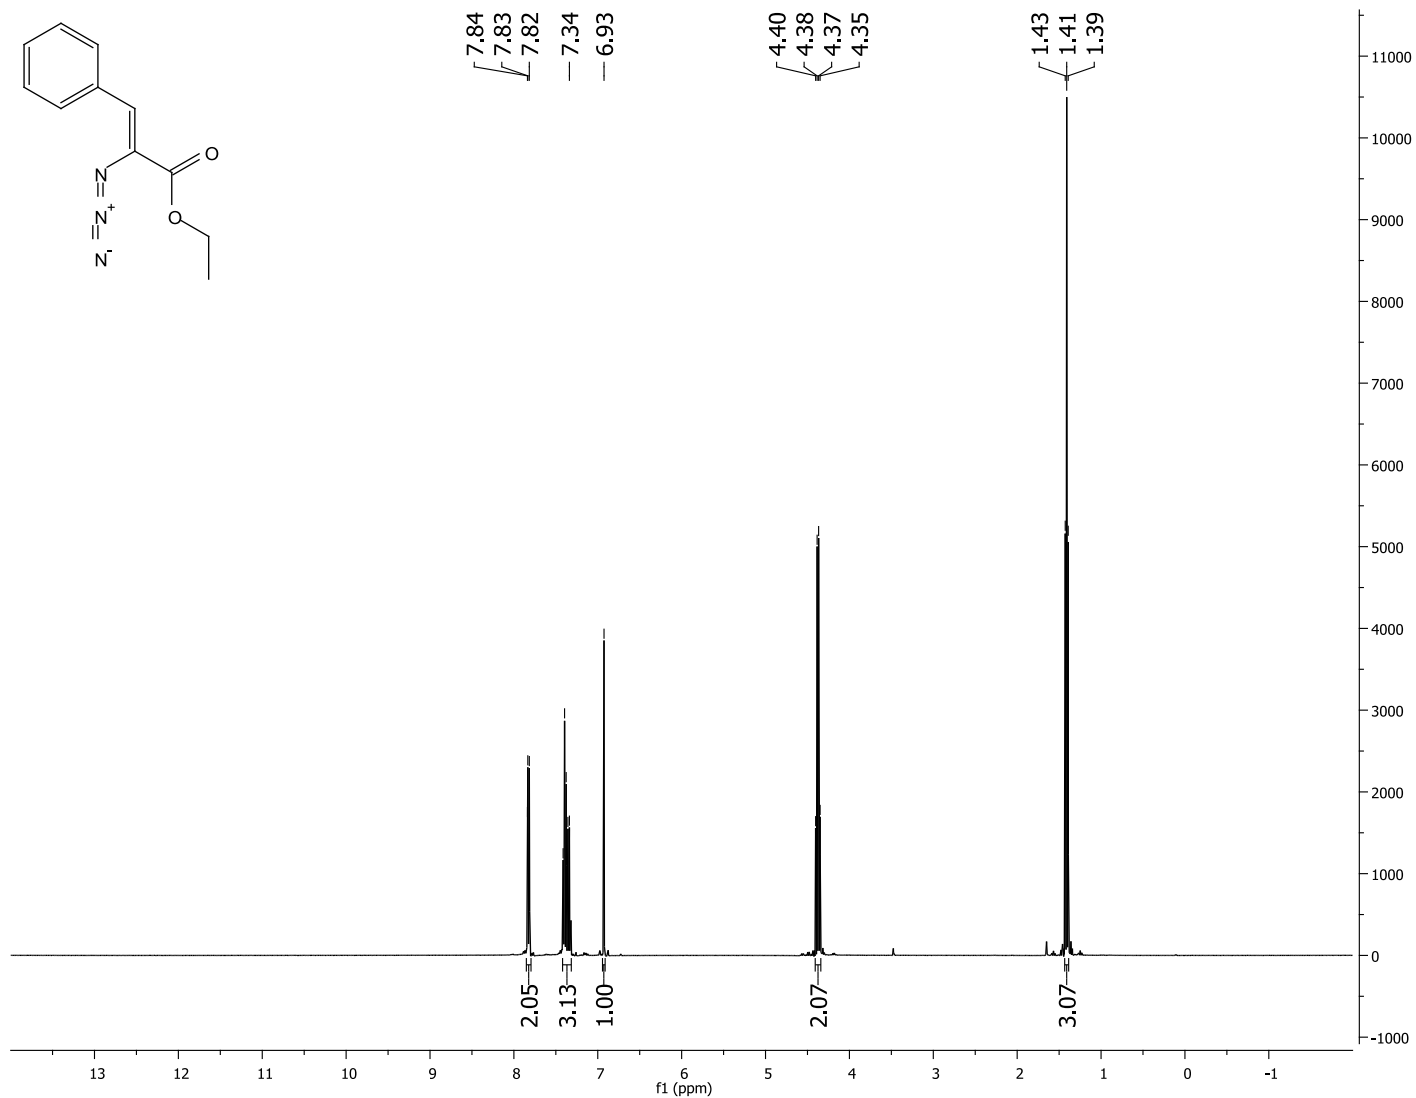

### <sup>13</sup>C NMR: (Z)-Ethyl α-azido-β-phenylacrylate (2a)

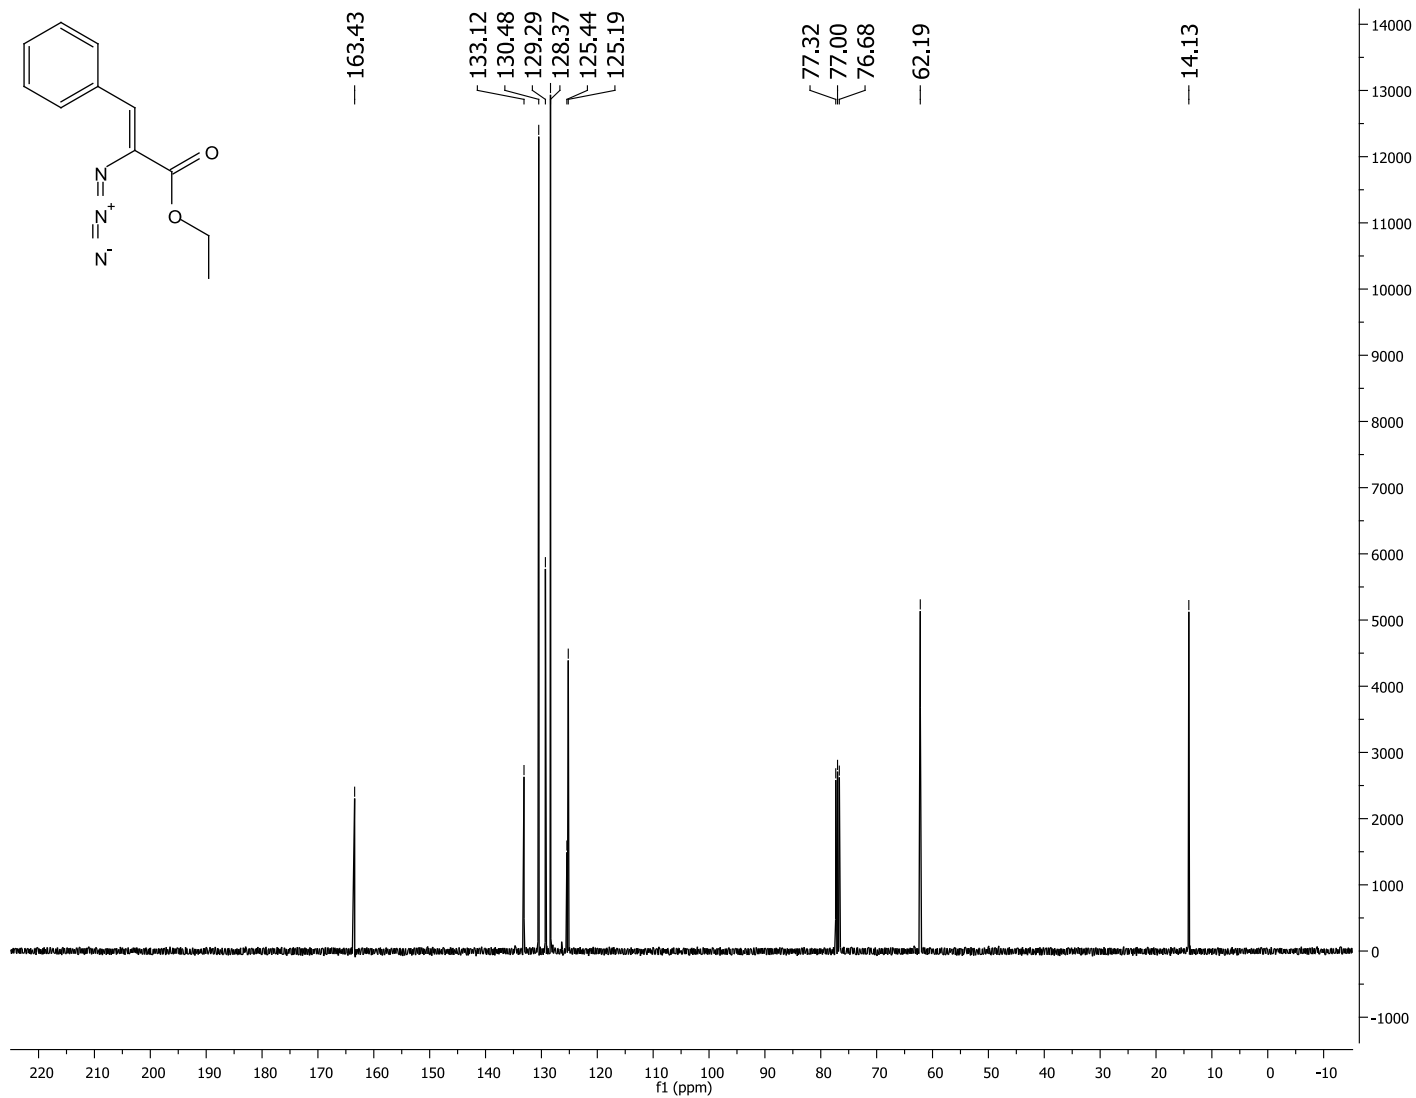

### $^3J_{C,H}$ of $^1H$ - $^{13}C$ Coupled NMR: (Z)-Ethyl $\alpha$ -azido- $\beta$ -phenylacrylate (2a)

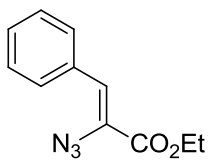

Current Data Parameters  
NAME pam06241  
EXPNO 2  
PROCNO 1

F2 - Acquisition Parameters  
Date\_ 20110624  
Time 14.10  
INSTRUM spect  
PROBHD 5 mm PABBO BB/  
PULPROG zg30  
TD 32768  
SOLVENT CDCl3  
NS 512  
DS 4  
SWH 3004.808 Hz  
FIDRES 0.091699 Hz  
AQ 5.4526453 sec  
RG 2048  
DW 166.400 usec  
DE 6.00 usec  
TE 295.0 K  
DL 2.00000000 sec  
TD0 1

==== CHANNEL f1 =====  
NUC1  $^{13}C$   
PI 10.0 usec  
PL1 0.0 dB  
SFO1 100.623701 MHz

F2 - Processing Parameters  
SI 32768  
SF 100.6127690 MHz  
WDW EM  
SSB 0  
LB 0.20 Hz  
GB 0  
PC 1.40

Standard C13

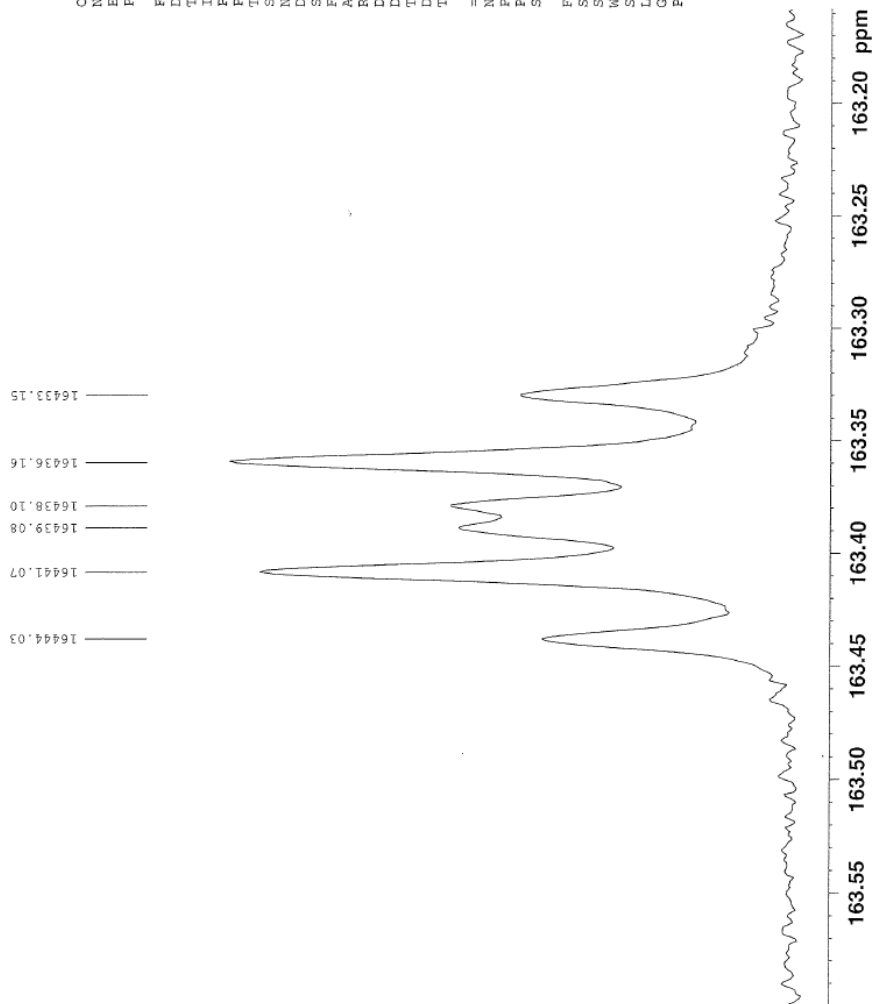

**<sup>1</sup>H NMR: (Z)-Ethyl meta-methyl-α-azido-β-phenylacrylate (2b)**

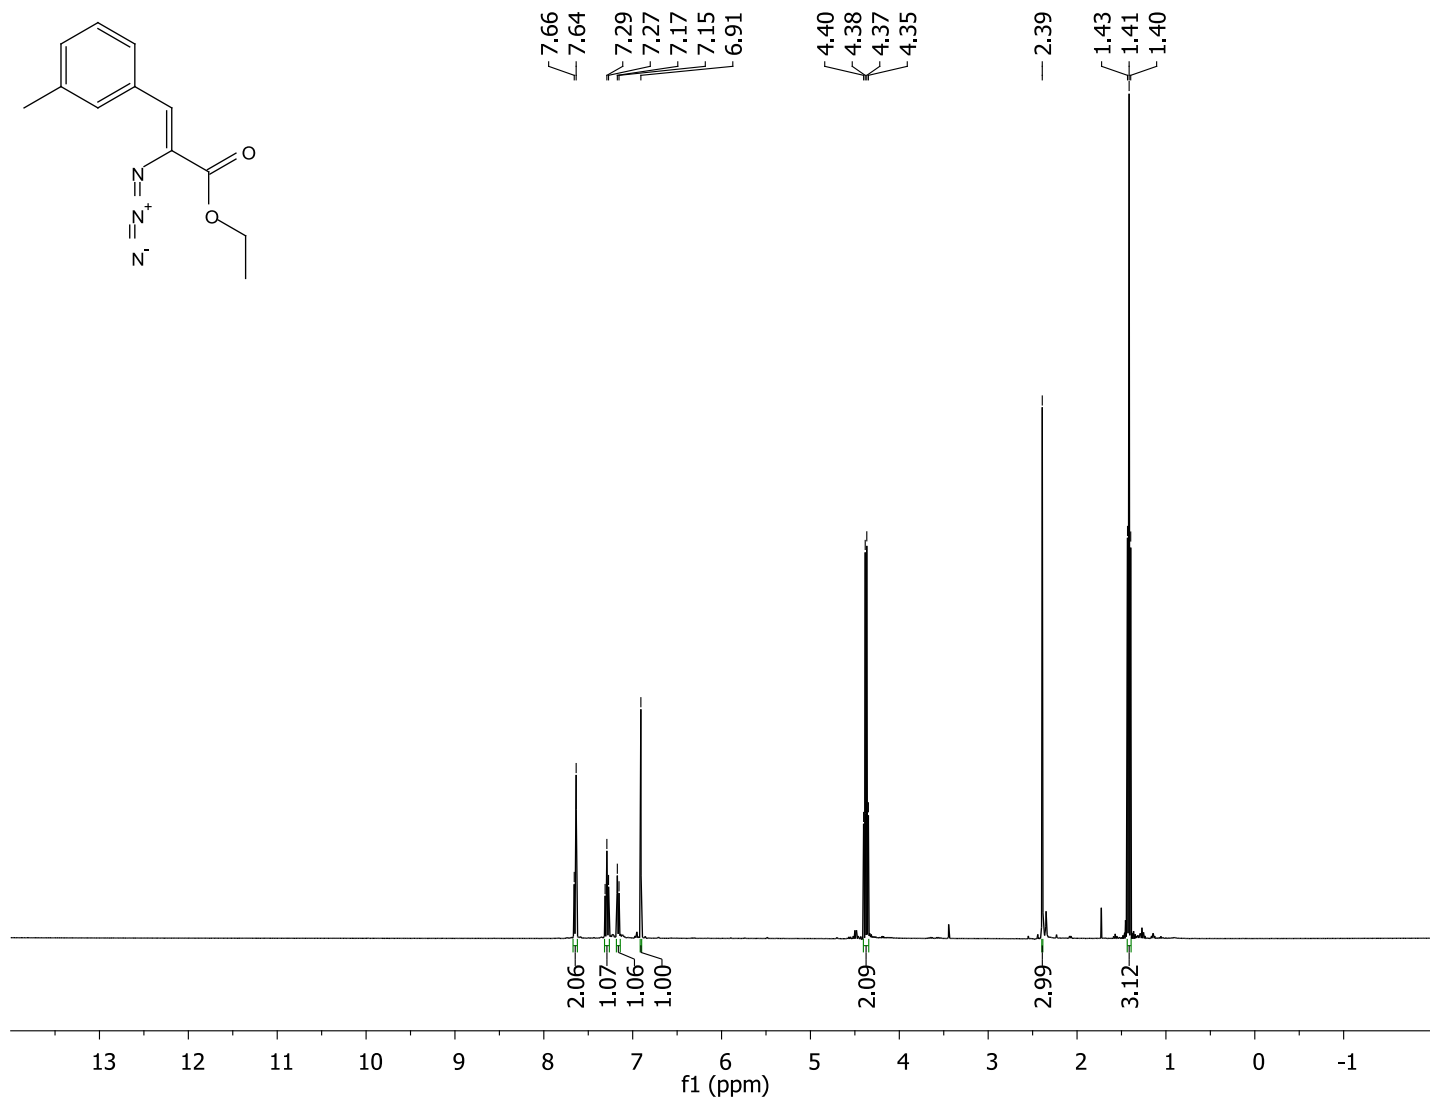

**<sup>13</sup>C NMR: (Z)-Ethyl *meta*-methyl- $\alpha$ -azido- $\beta$ -phenylacrylate (2b)**

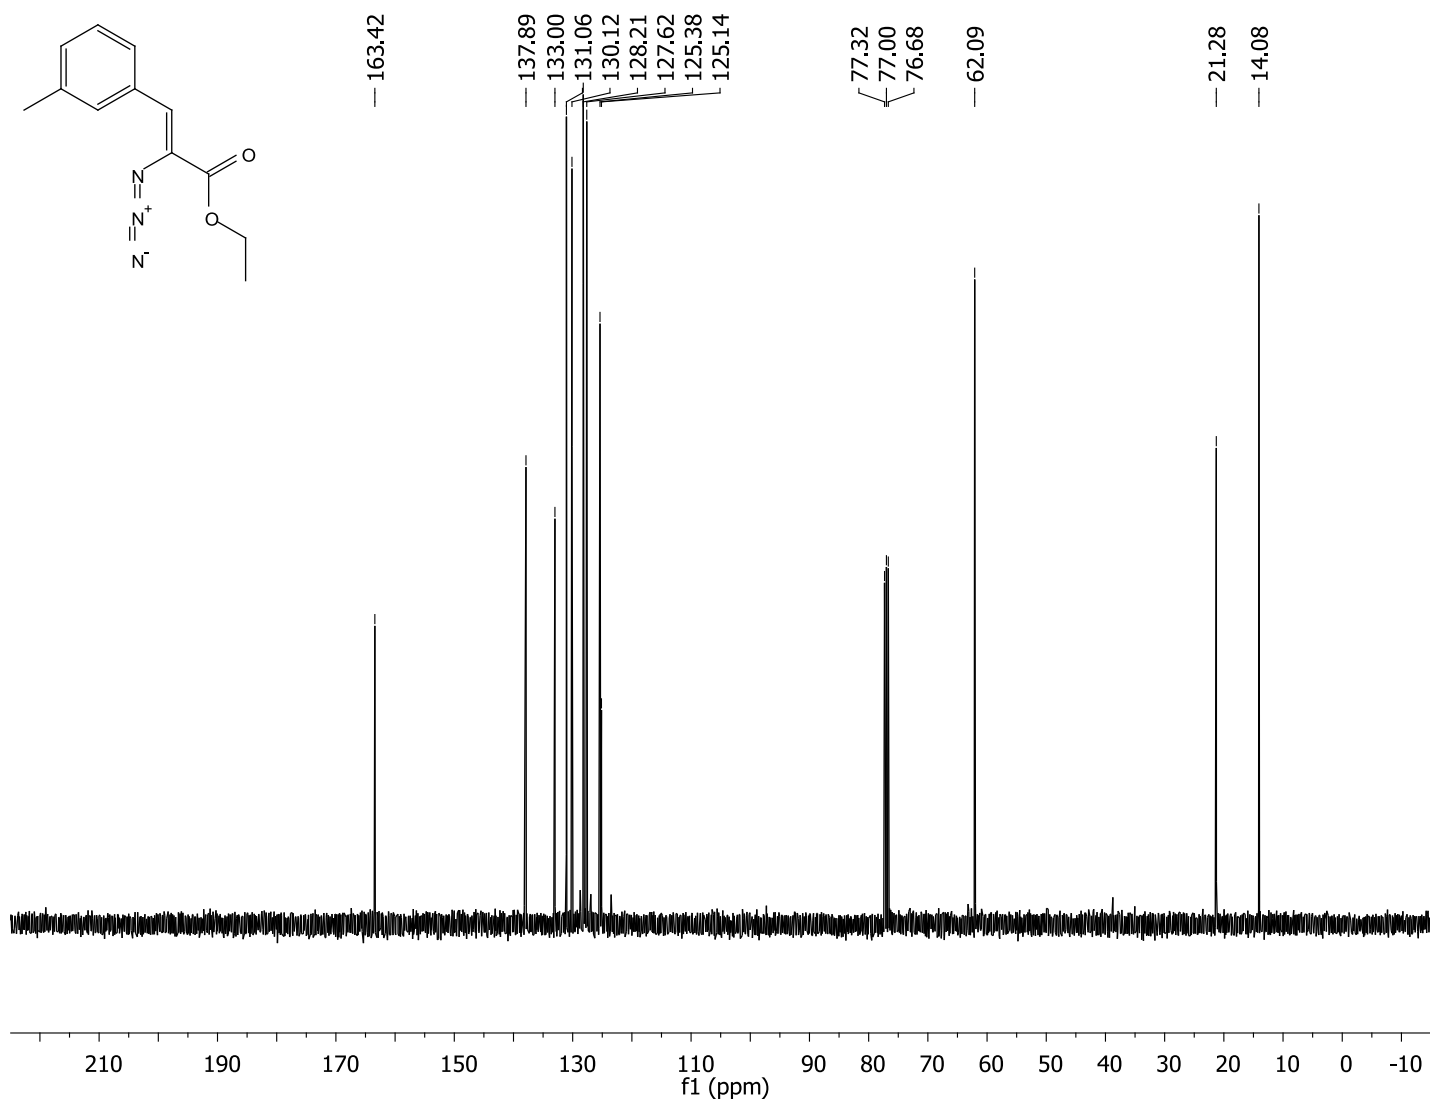

**$^1\text{H}$ - $^{13}\text{C}$  Coupled NMR: (Z)-Ethyl *meta*-methyl- $\alpha$ -azido- $\beta$ -phenylacrylate (2b)**

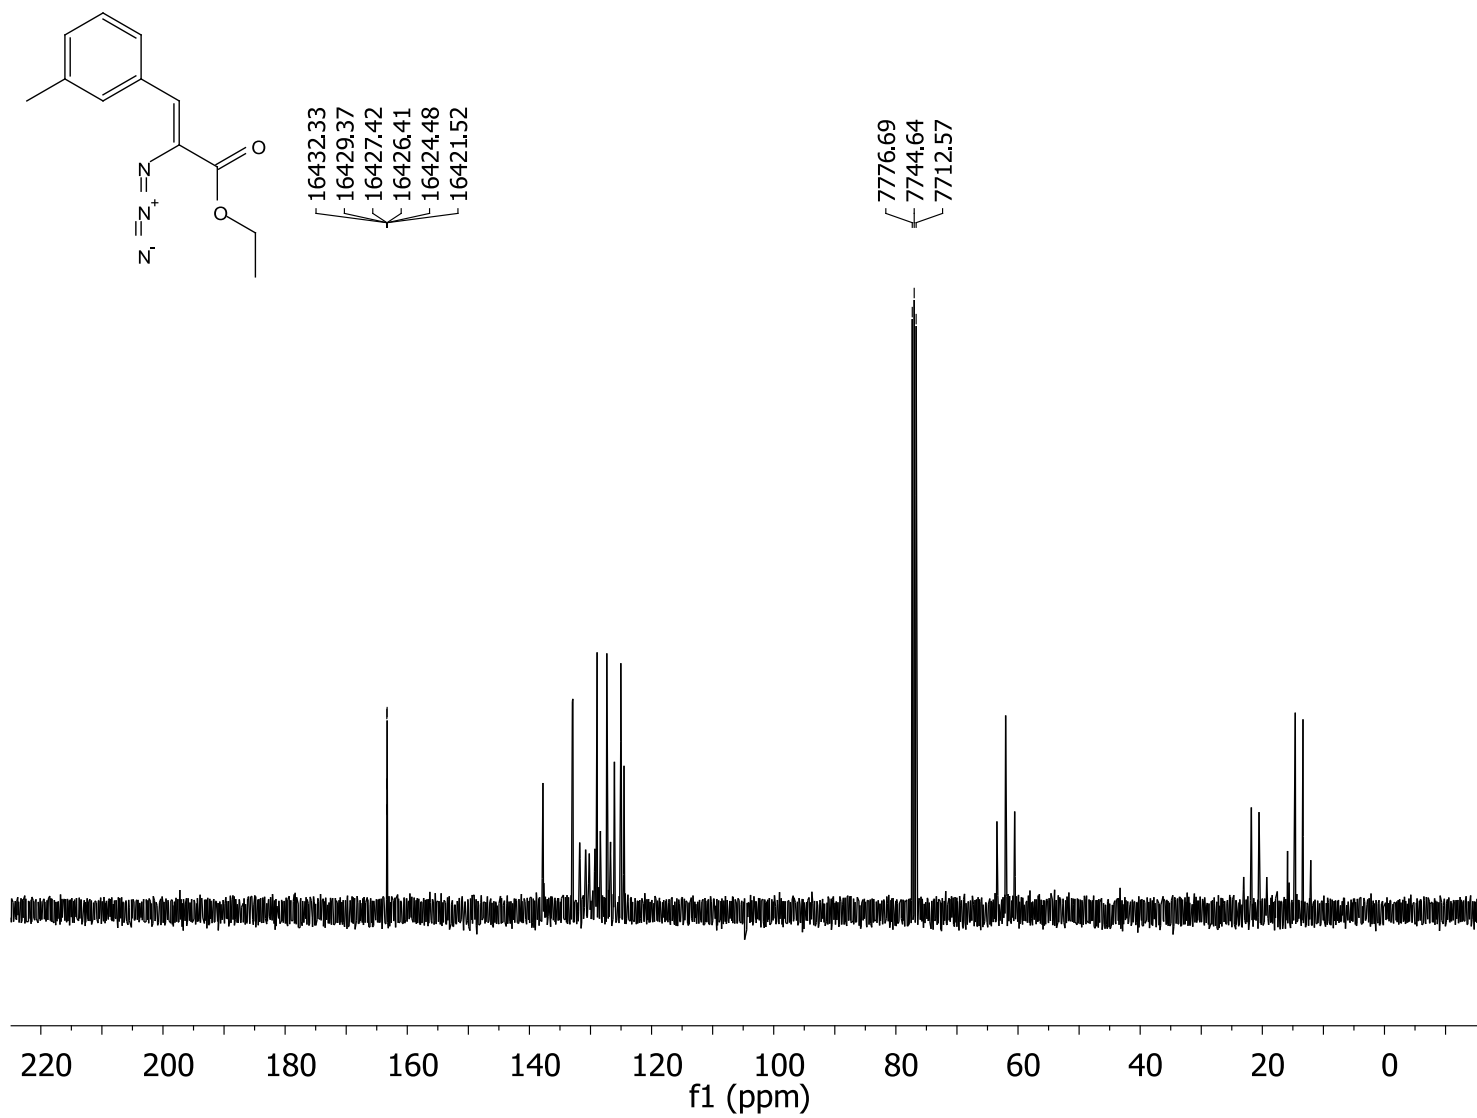

**$^3J_{C,H}$  of  $^1H$ - $^{13}C$  Coupled NMR: (Z)-Ethyl *meta*-methyl- $\alpha$ -azido- $\beta$ -phenylacrylate (2b)**

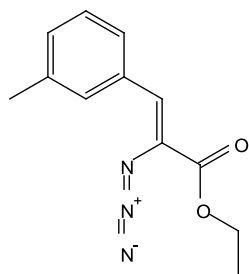

— 16432.33  
— 16429.37  
— 16426.41  
— 16424.48  
— 16421.52

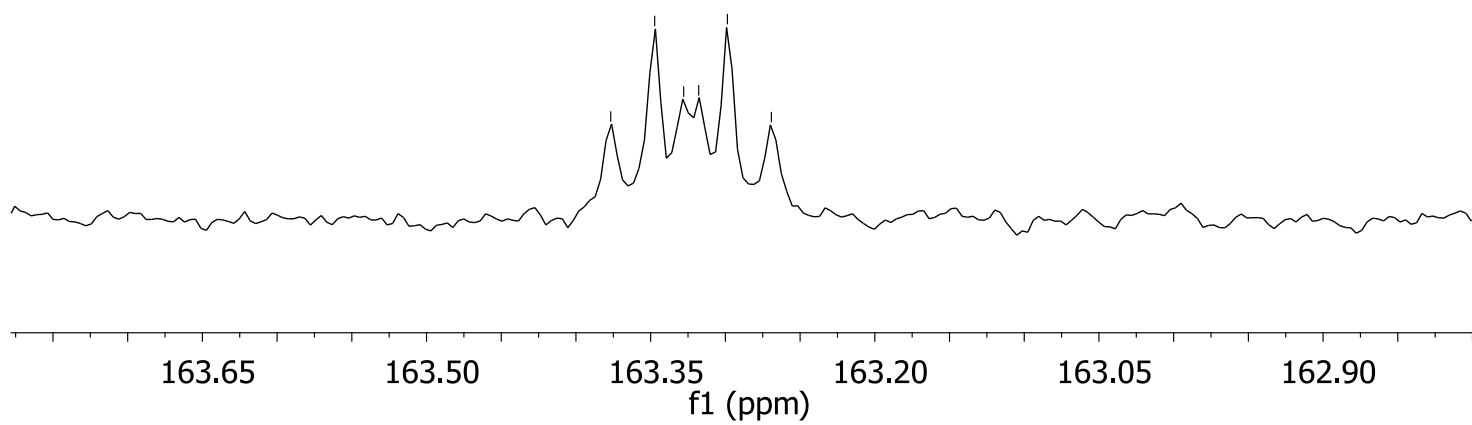



**<sup>1</sup>H NMR: (Z)-Ethyl meta-methoxy-α-azido-β-phenylacrylate (2c)**

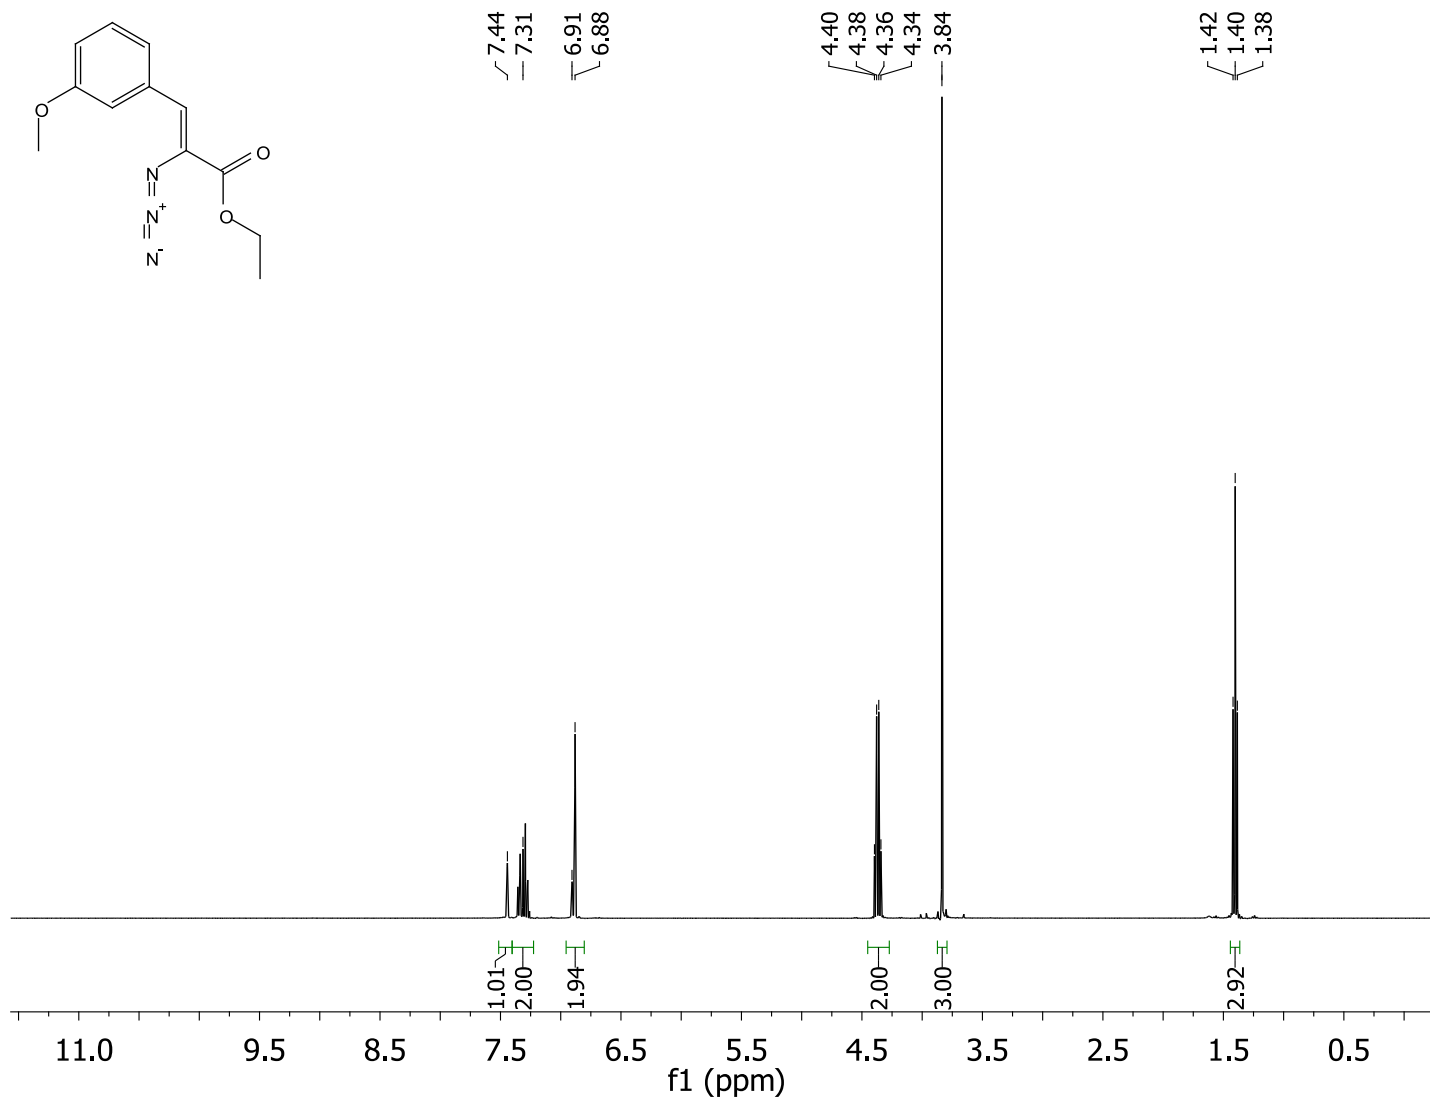

**$^{13}\text{C}$  NMR: (Z)-Ethyl *meta*-methoxy- $\alpha$ -azido- $\beta$ -phenylacrylate (2c)**

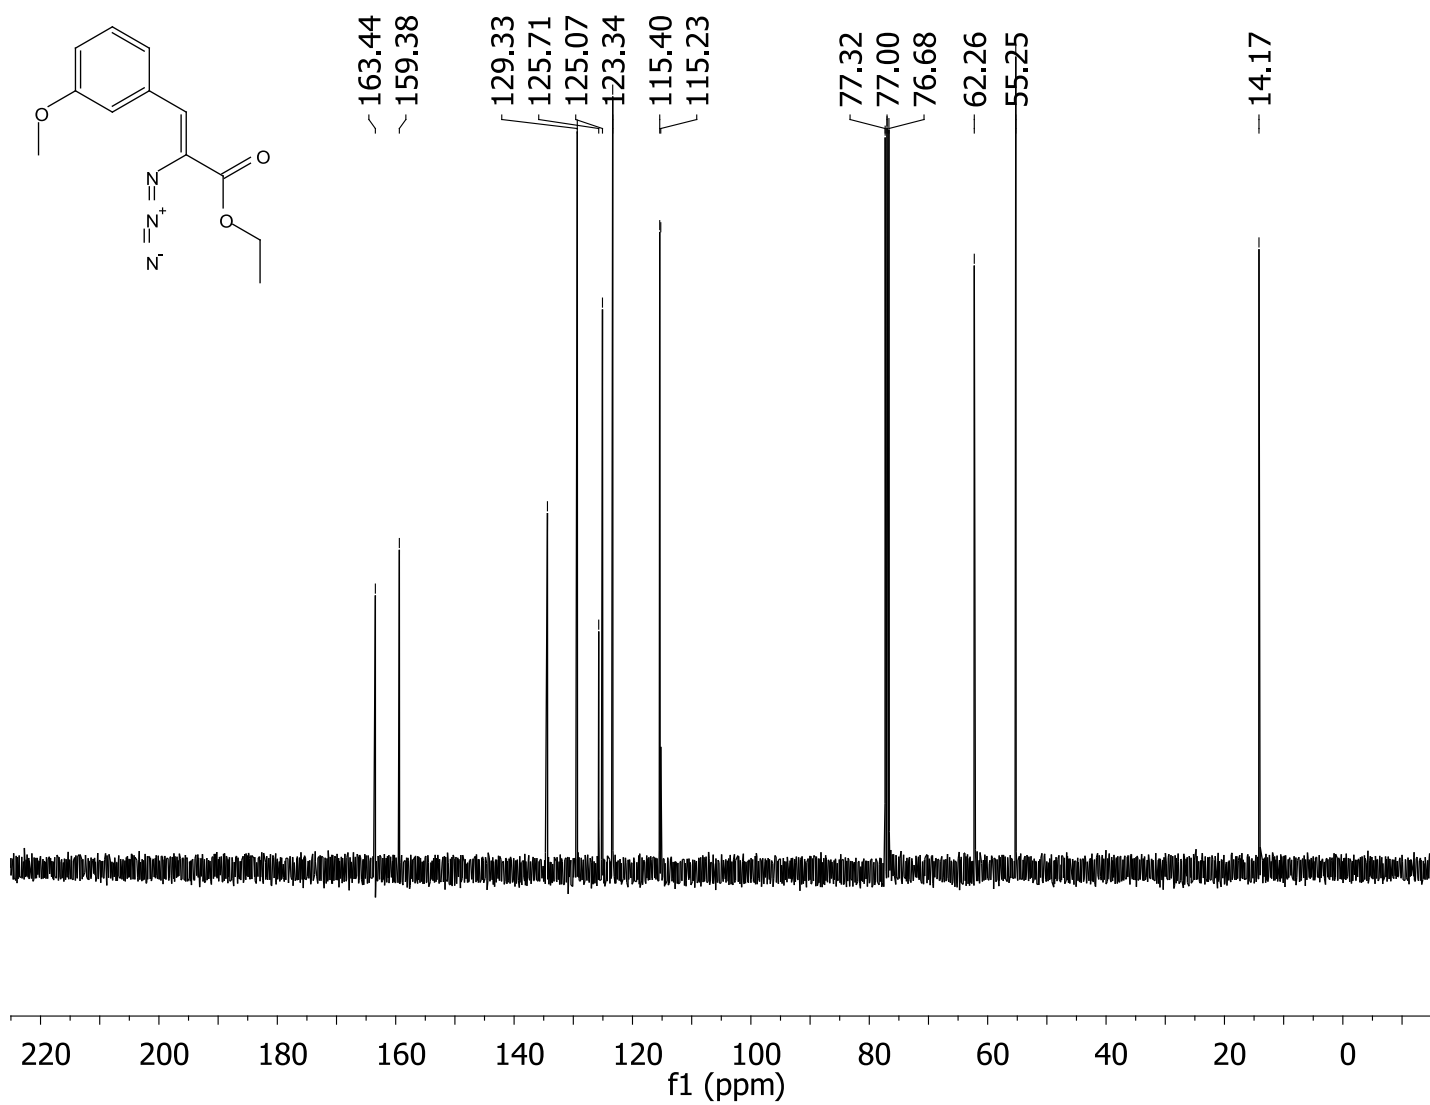

**$^1\text{H}$ - $^{13}\text{C}$  Coupled NMR: (Z)-Ethyl *meta*-methoxy- $\alpha$ -azido- $\beta$ -phenylacrylate (2c)**

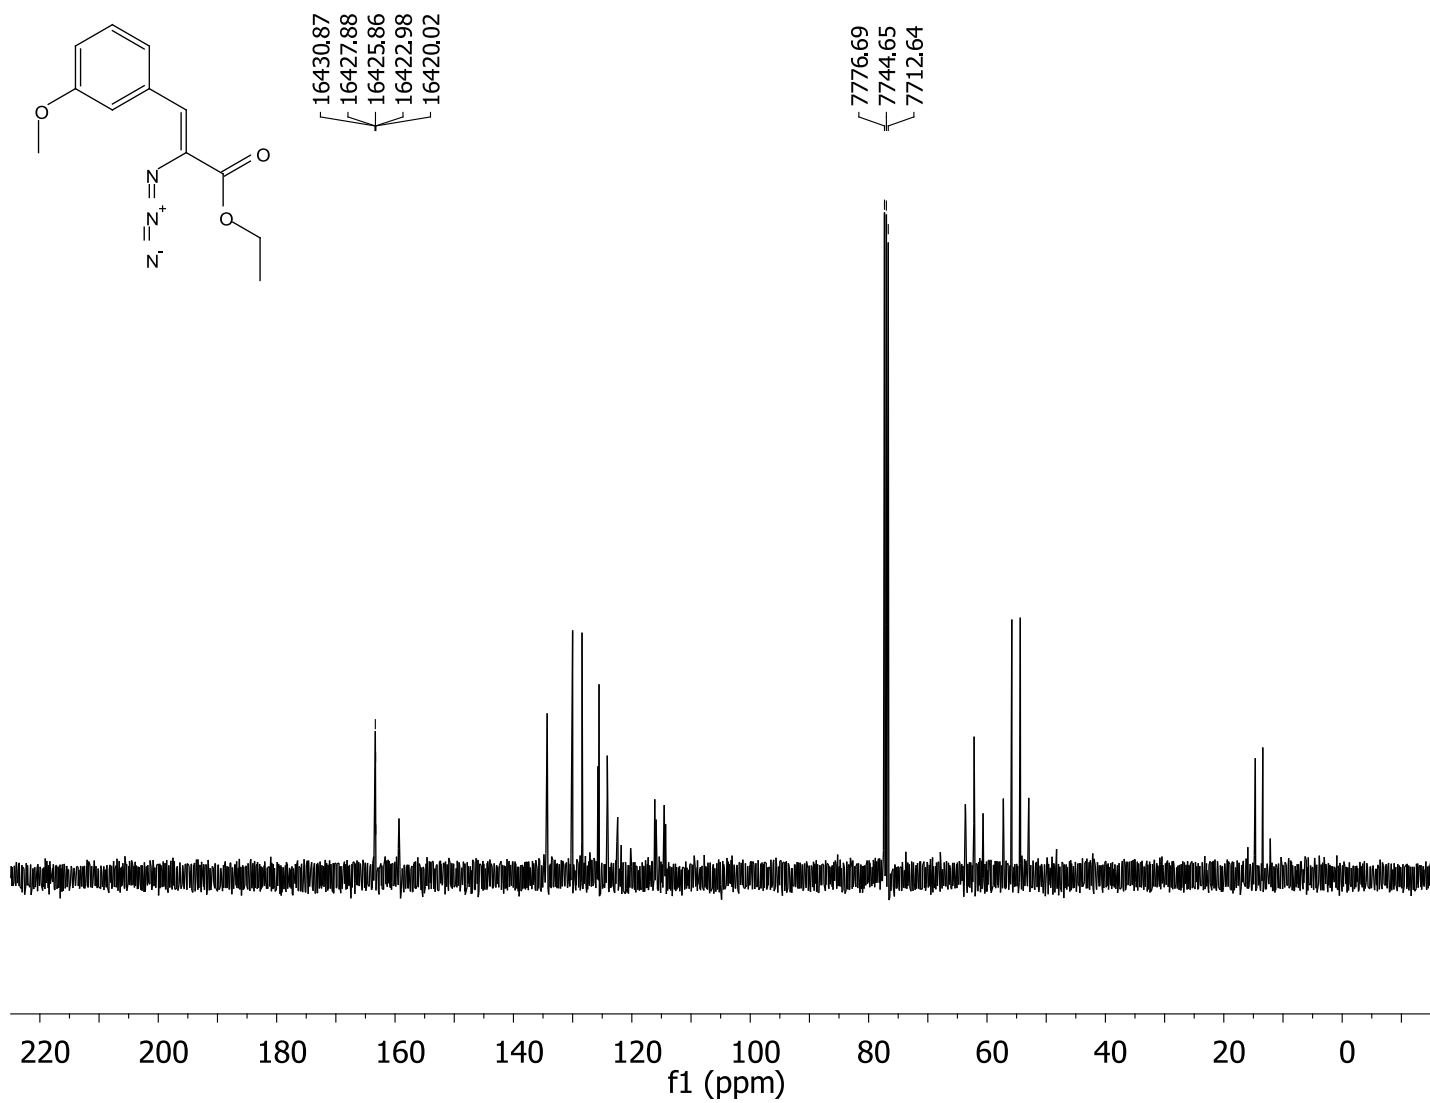

**$^3J_{C,H}$  of  $^1H$ - $^{13}C$  Coupled NMR: (Z)-Ethyl *meta*-methoxy- $\alpha$ -azido- $\beta$ -phenylacrylate (2c)**

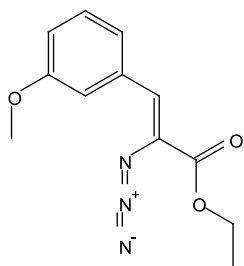

— 16430.87  
— 16427.88  
— 16425.86  
— 16422.98  
— 16420.02

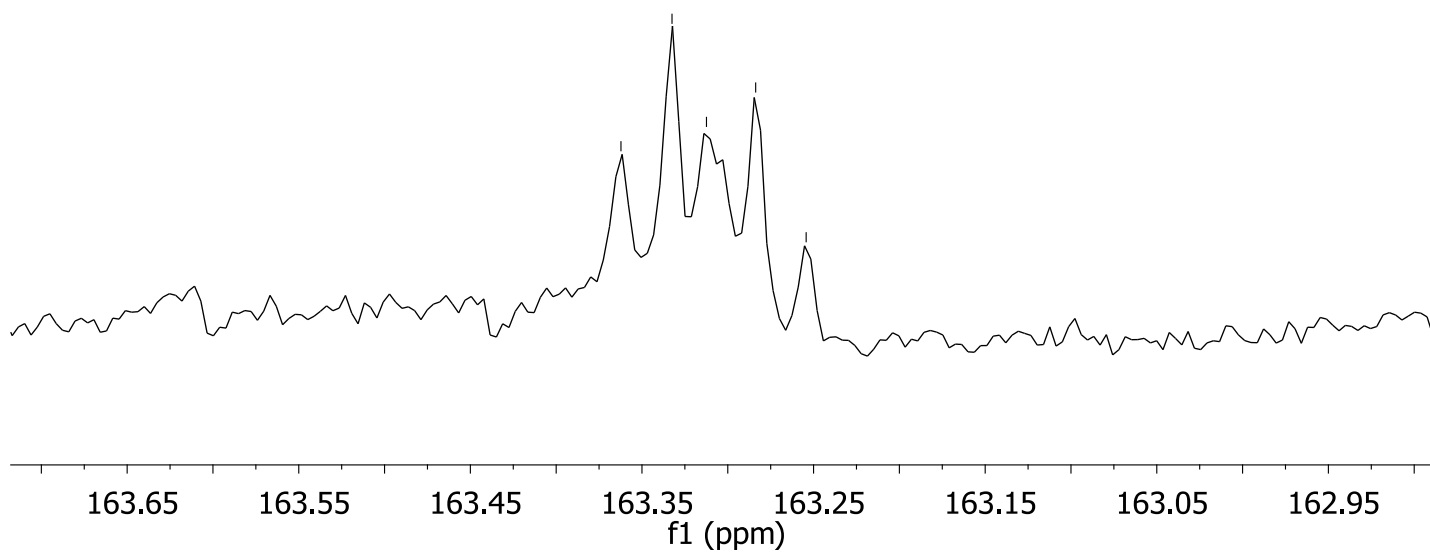

**<sup>1</sup>H NMR: (Z)-Ethyl meta-chloro- $\alpha$ -azido- $\beta$ -phenylacrylate (2d)**

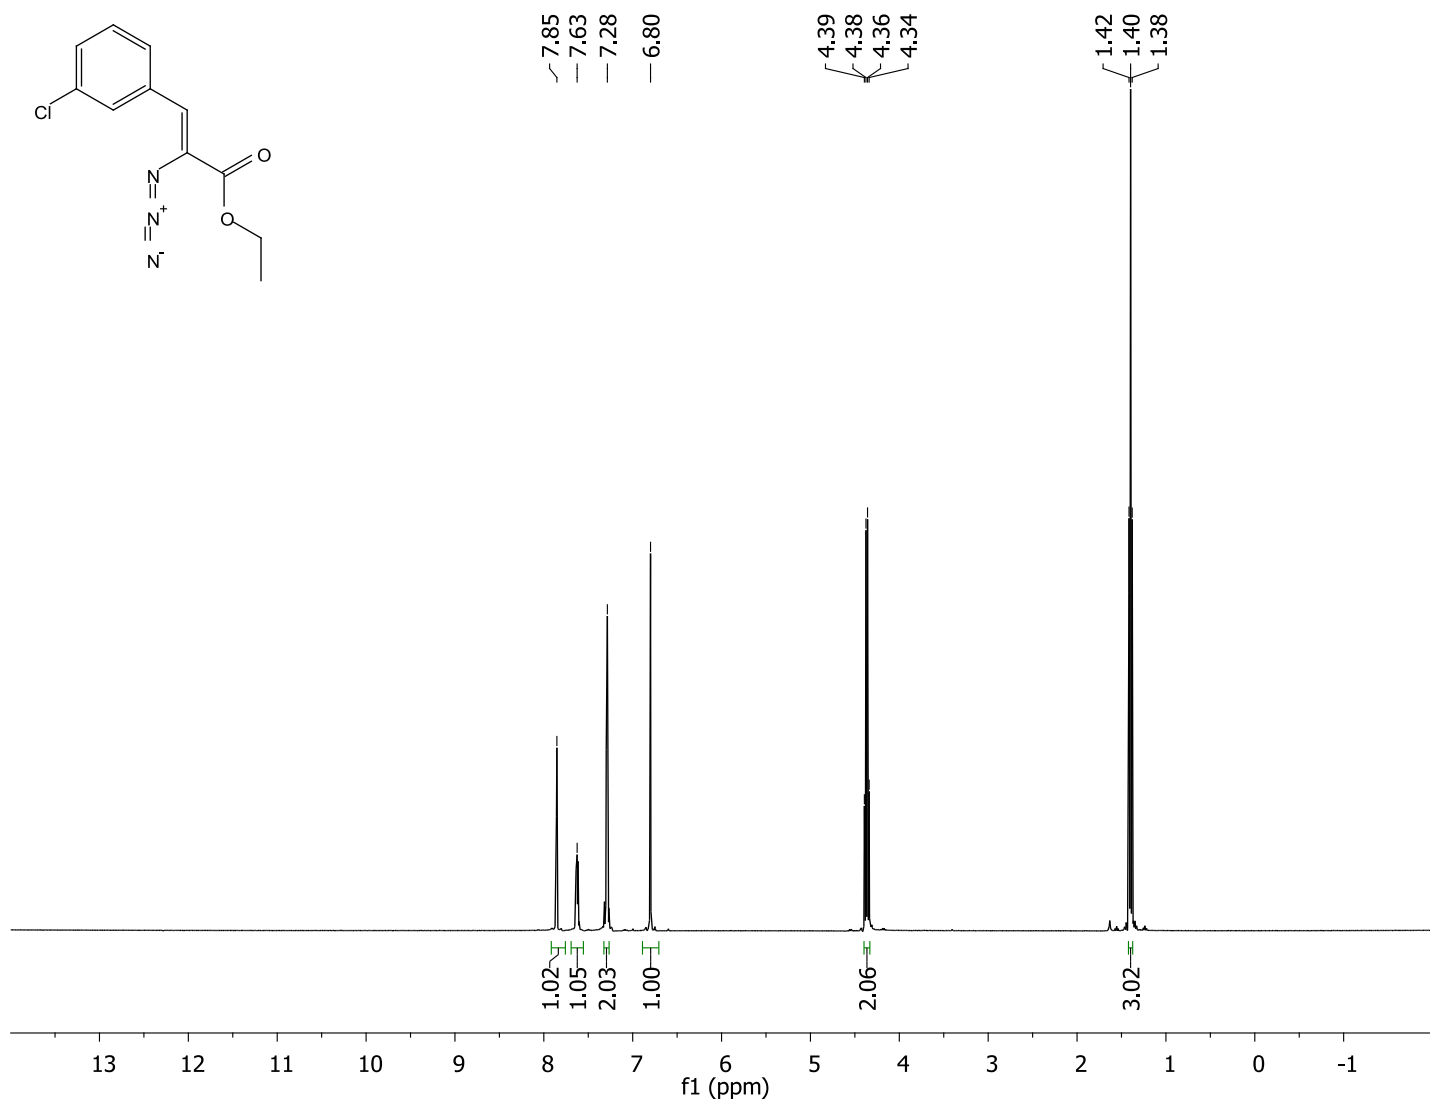

**$^{13}\text{C}$  NMR: (Z)-Ethyl *meta*-chloro- $\alpha$ -azido- $\beta$ -phenylacrylate (2d)**

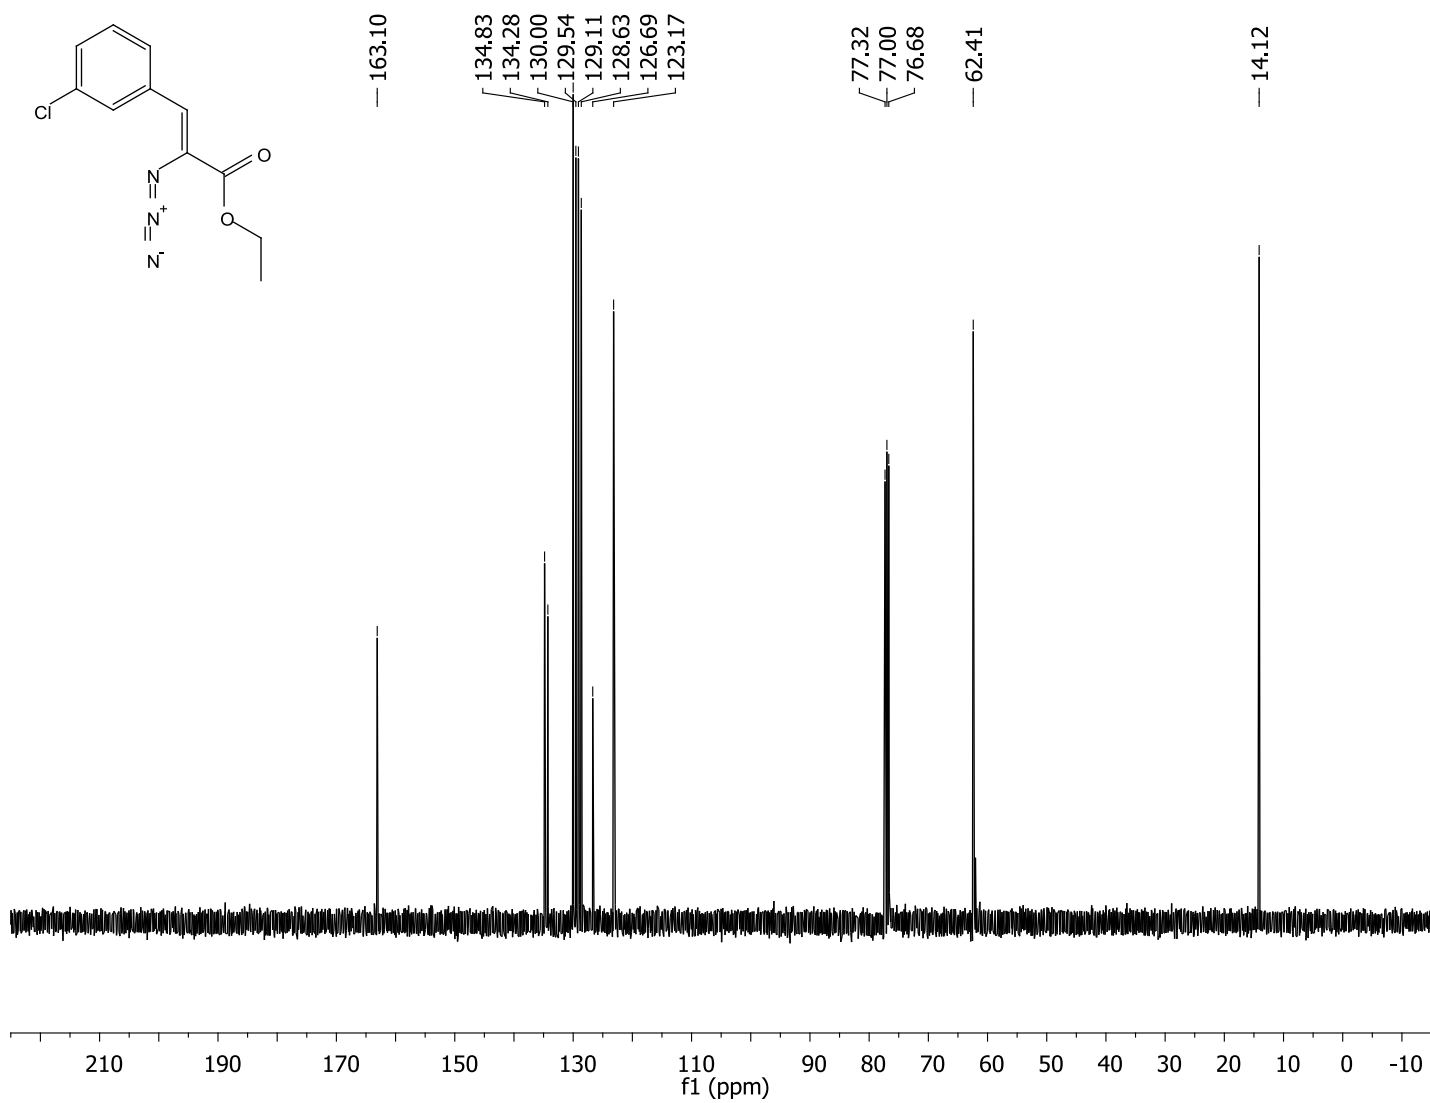

**$^1\text{H}$ - $^{13}\text{C}$  Coupled NMR: (Z)-Ethyl *meta*-chloro- $\alpha$ -azido- $\beta$ -phenylacrylate (2d)**

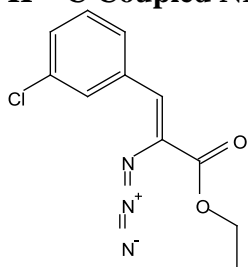

16401.30  
16398.34  
16396.23  
16395.51  
16393.38  
16390.32

7776.58  
7744.59  
7712.58

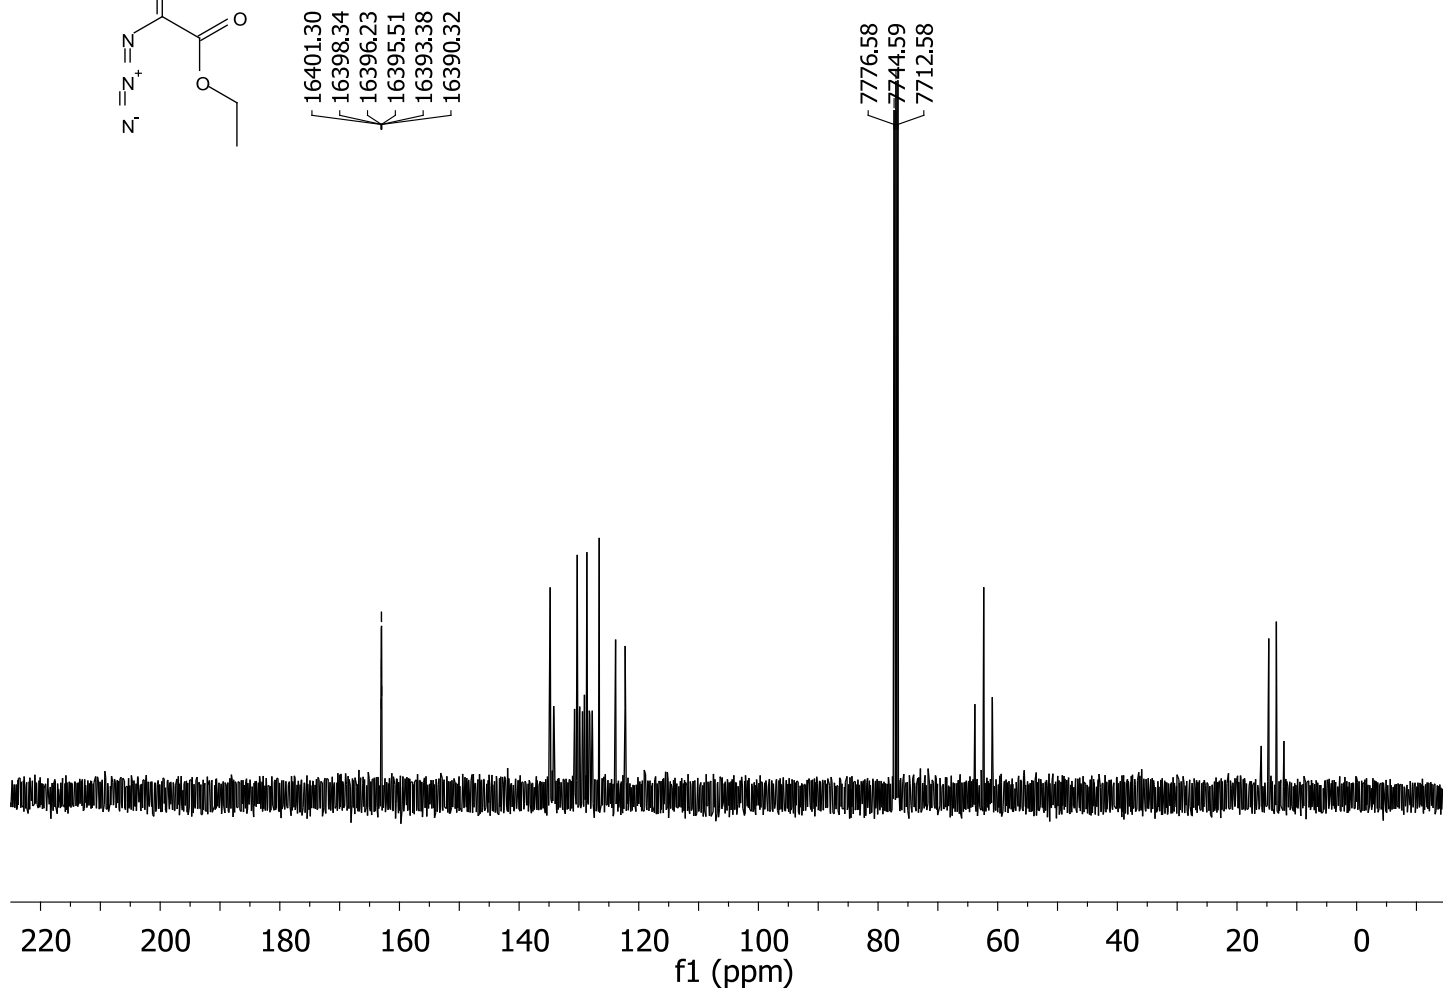

**$^3J_{C,H}$  of  $^1H$ - $^{13}C$  Coupled NMR: (Z)-Ethyl *meta*-chloro- $\alpha$ -azido- $\beta$ -phenylacrylate (2d)**

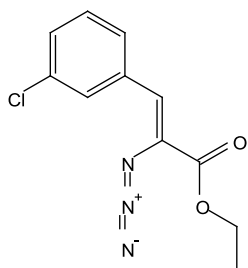

— 16401.30  
— 16398.34  
— 16396.23  
— 16395.51  
— 16393.38  
— 16390.32

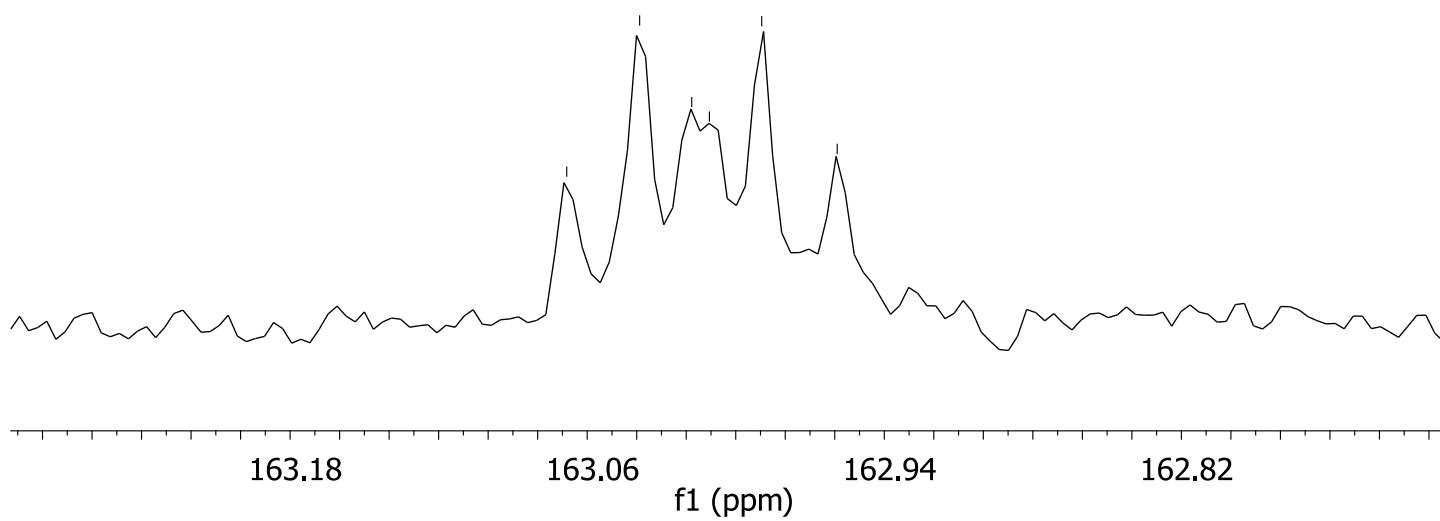



**<sup>1</sup>H NMR: (Z)-Ethyl meta-phenyl- $\alpha$ -azido- $\beta$ -phenylacrylate (2e)**

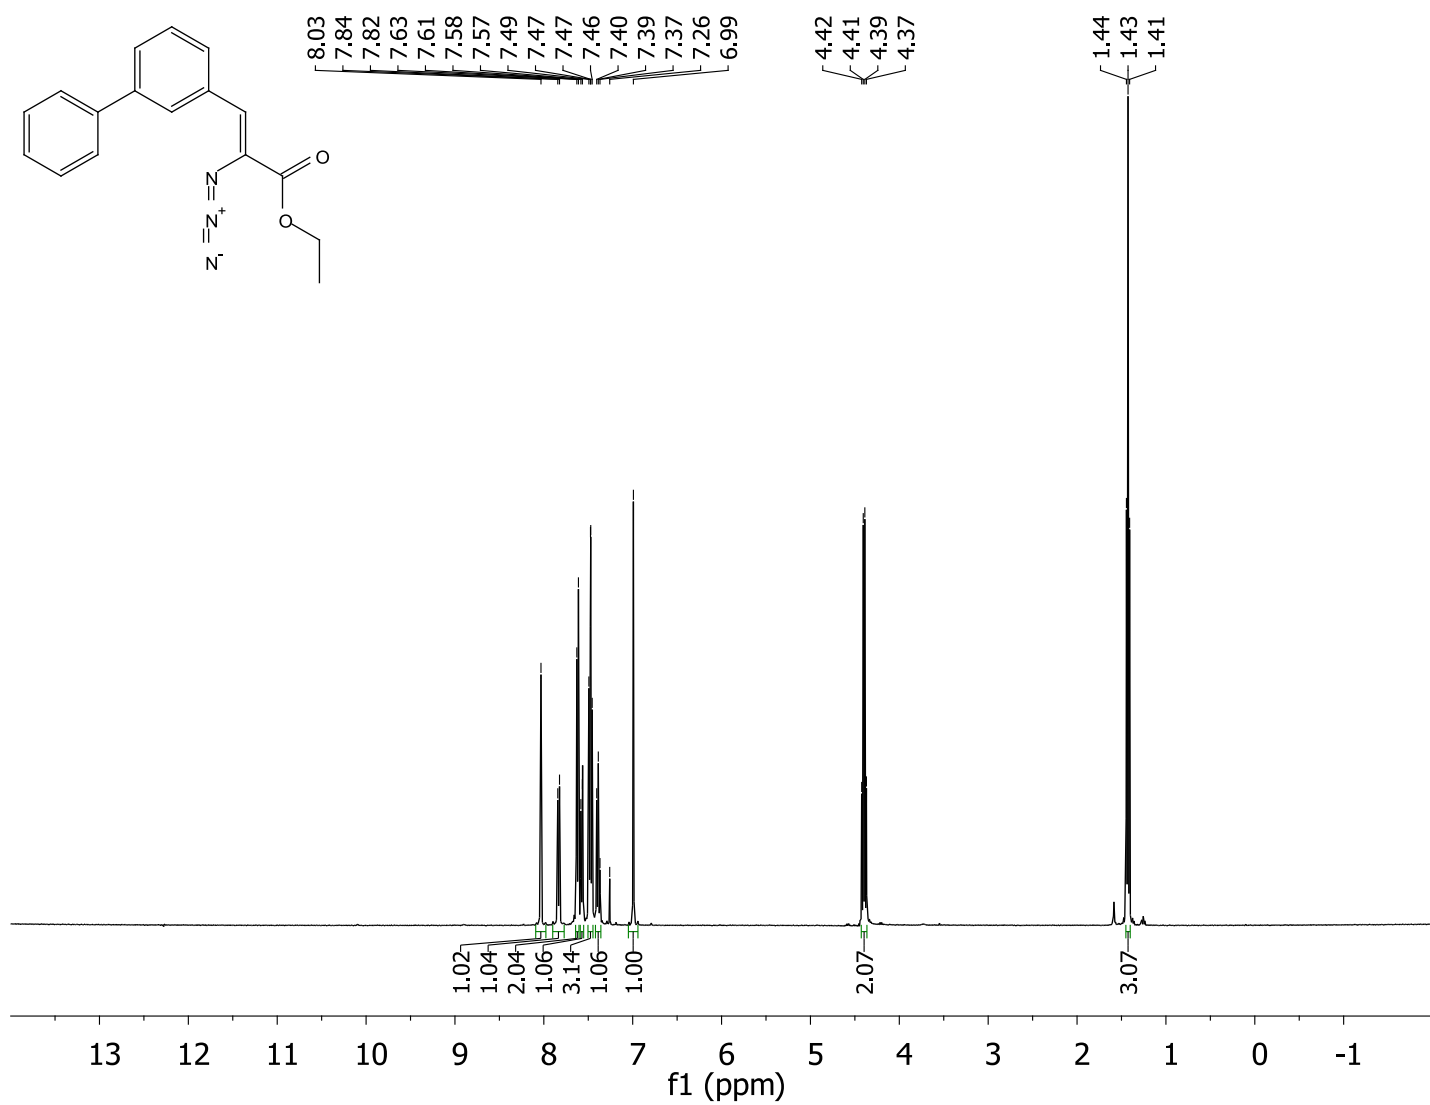

**<sup>13</sup>C NMR: Z)-Ethyl meta-phenyl-α-azido-β-phenylacrylate (2e)**

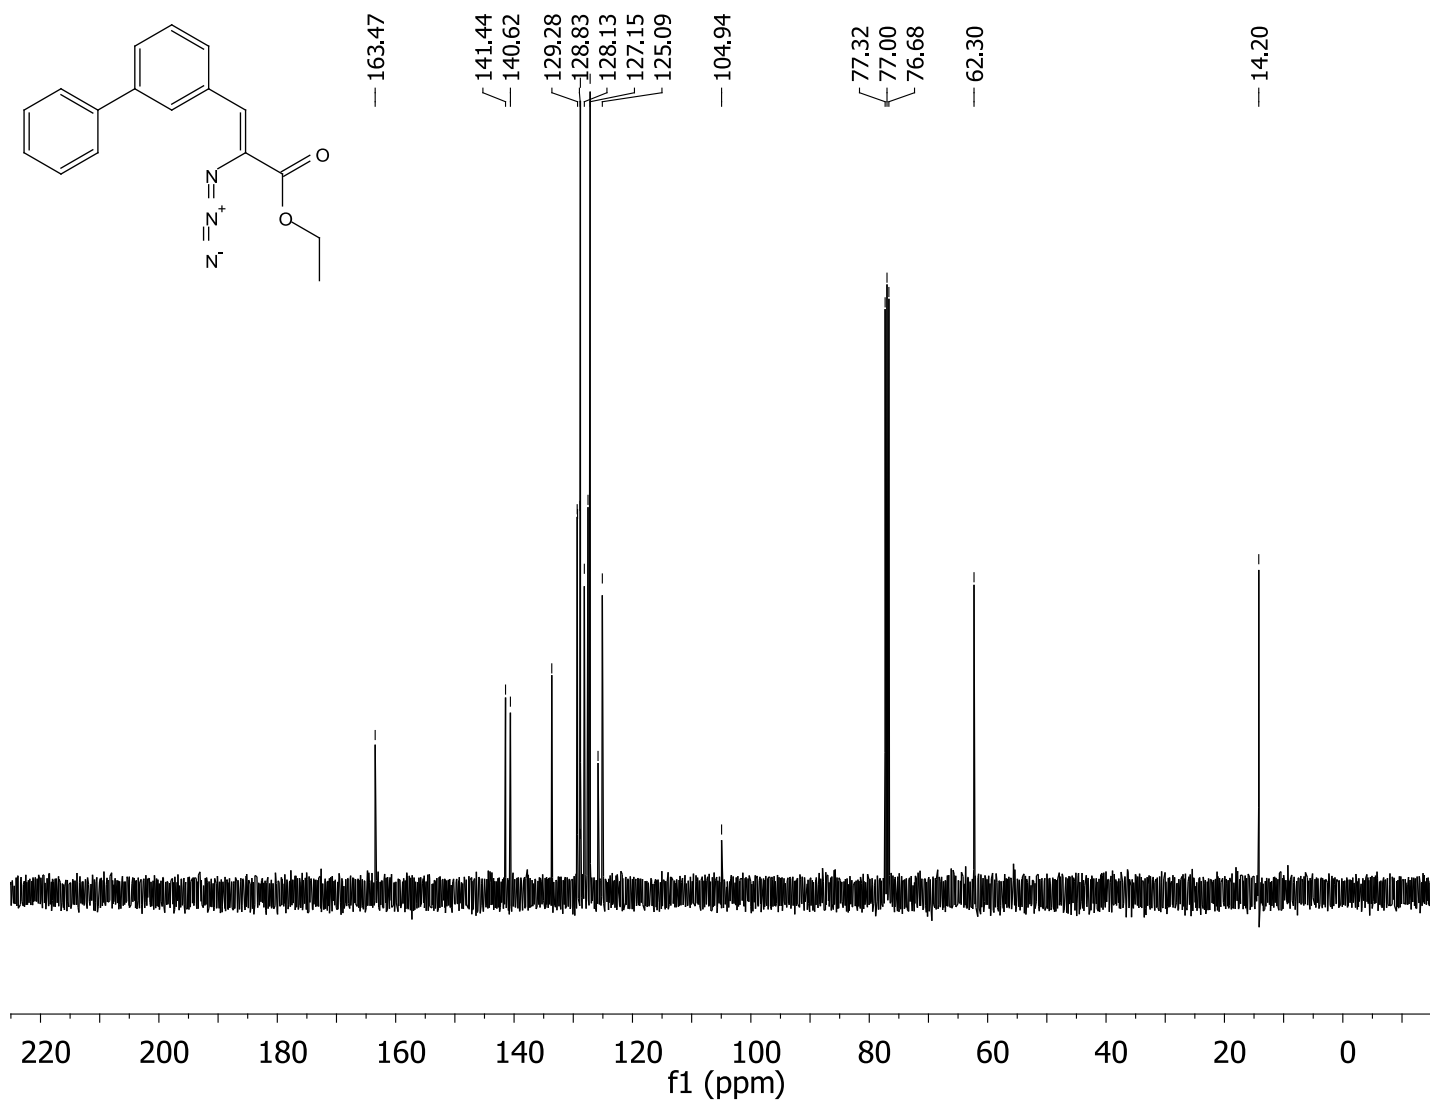

### $^1\text{H}$ - $^{13}\text{C}$ Coupled NMR: *Z*-Ethyl *meta*-phenyl- $\alpha$ -azido- $\beta$ -phenylacrylate (2e)

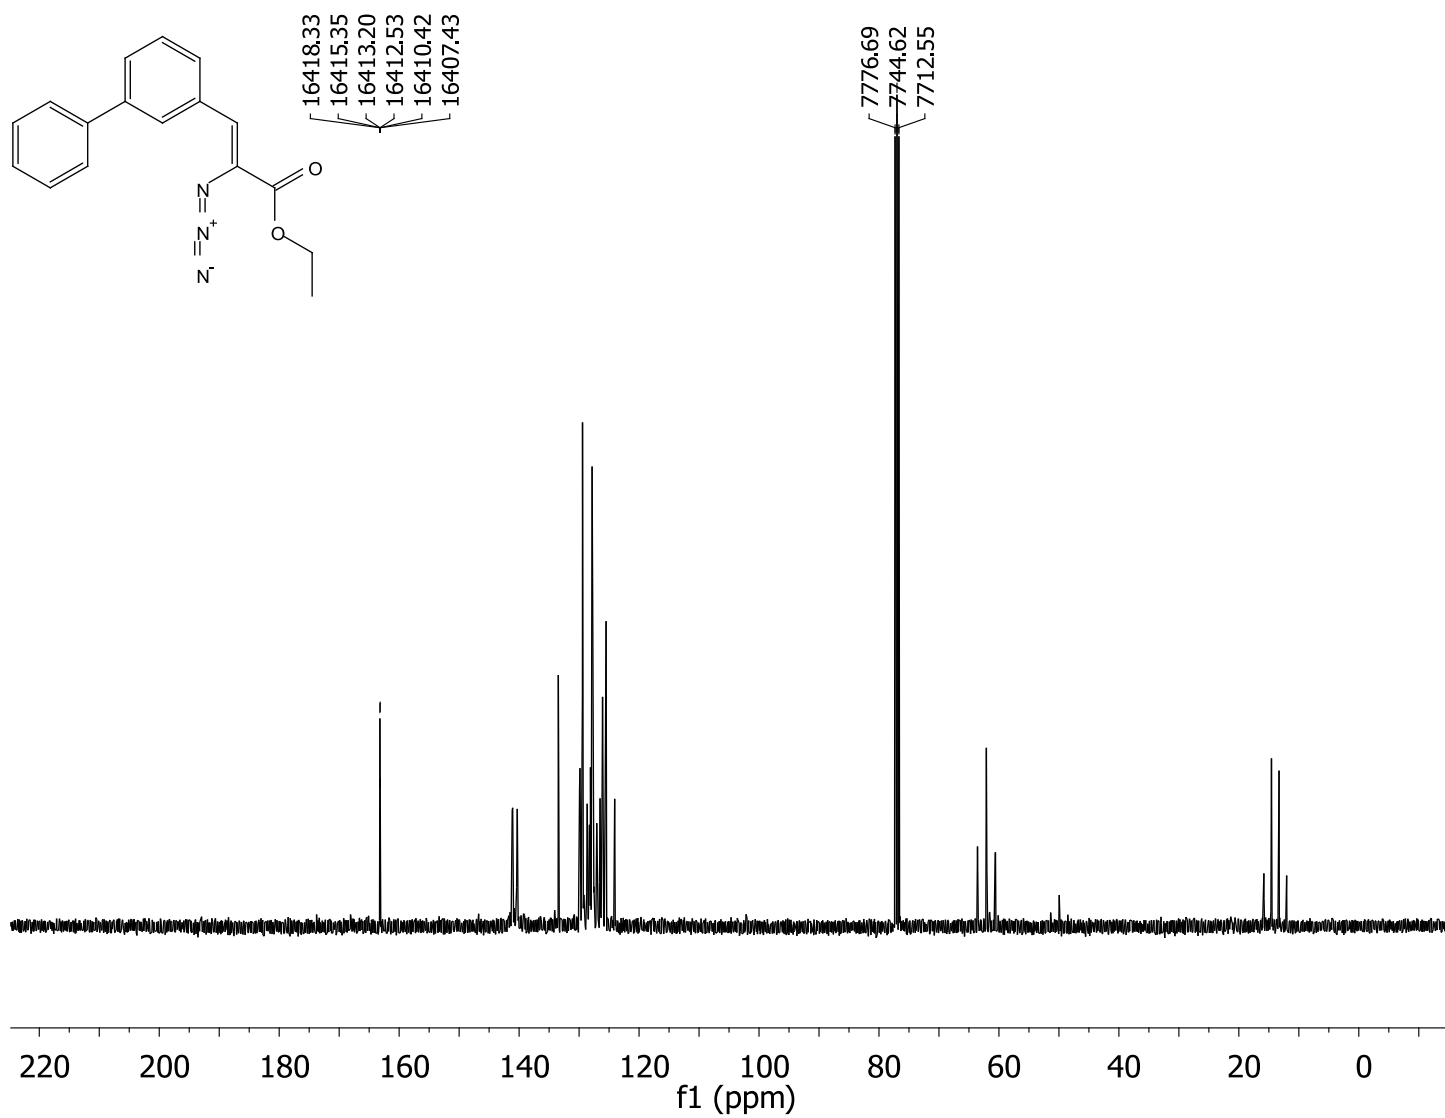

$^3J_{C,H}$  of  $^1H$ - $^{13}C$  Coupled NMR: **Z**-Ethyl *meta*-phenyl- $\alpha$ -azido- $\beta$ -phenylacrylate (**2e**)

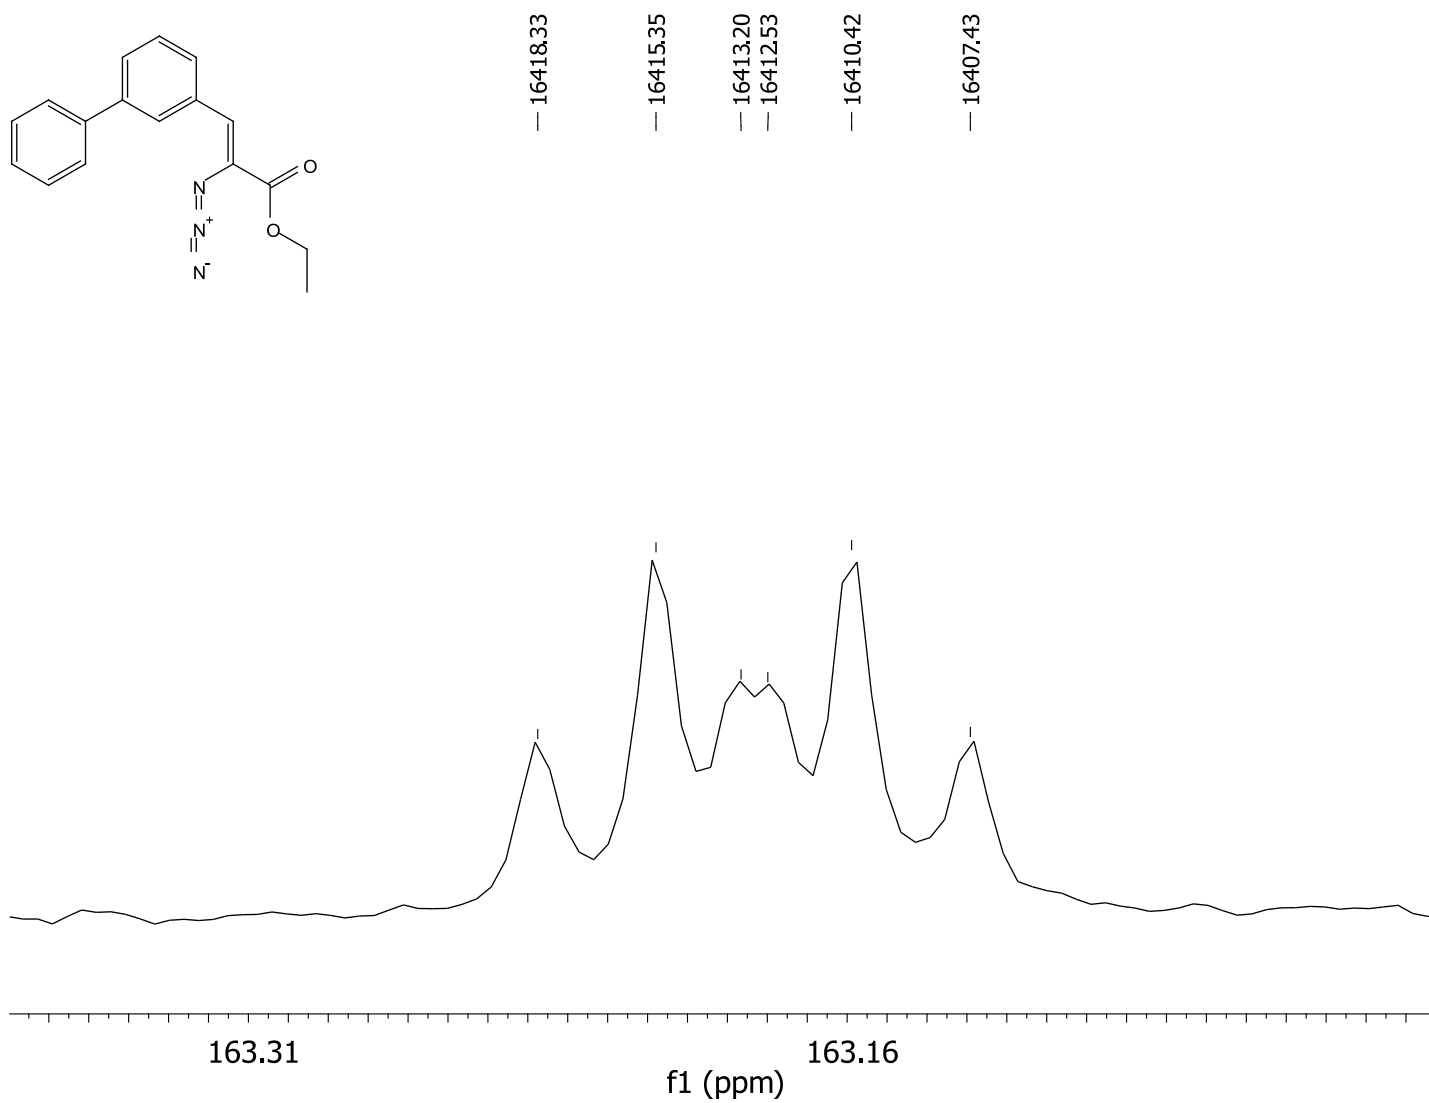

**<sup>1</sup>H NMR: (Z)-Ethyl meta-nitro-α-azido-β-phenylacrylate (2f)**

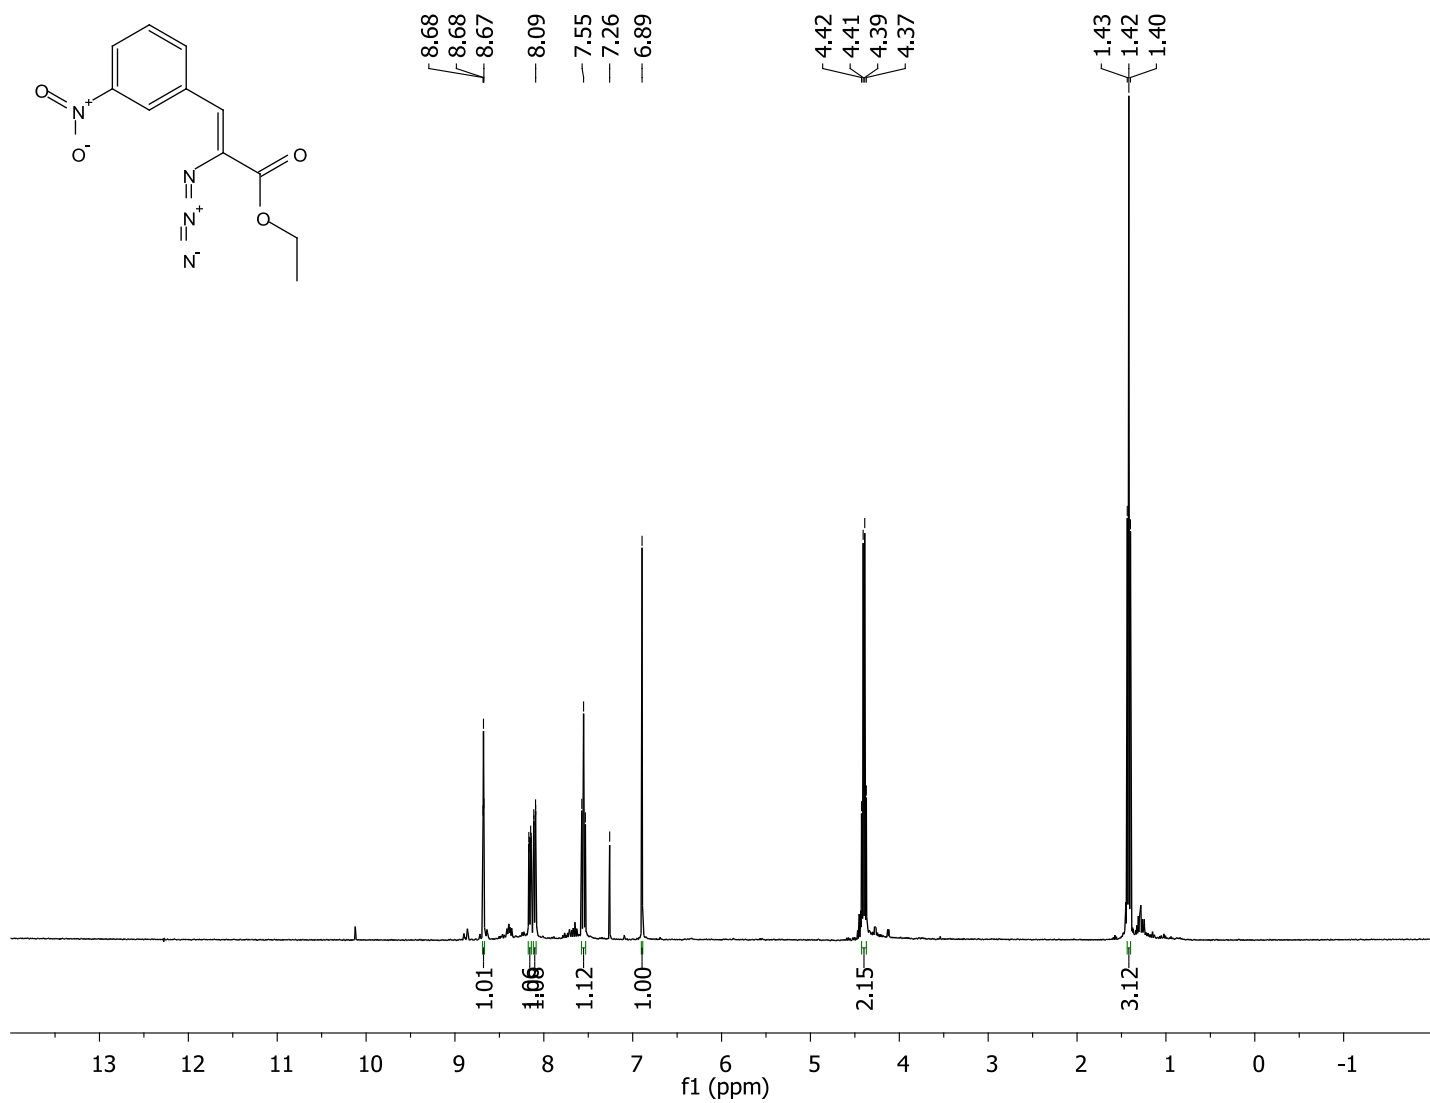

### $^{13}\text{C}$ NMR: (Z)-Ethyl *meta*-nitro- $\alpha$ -azido- $\beta$ -phenylacrylate (2f)

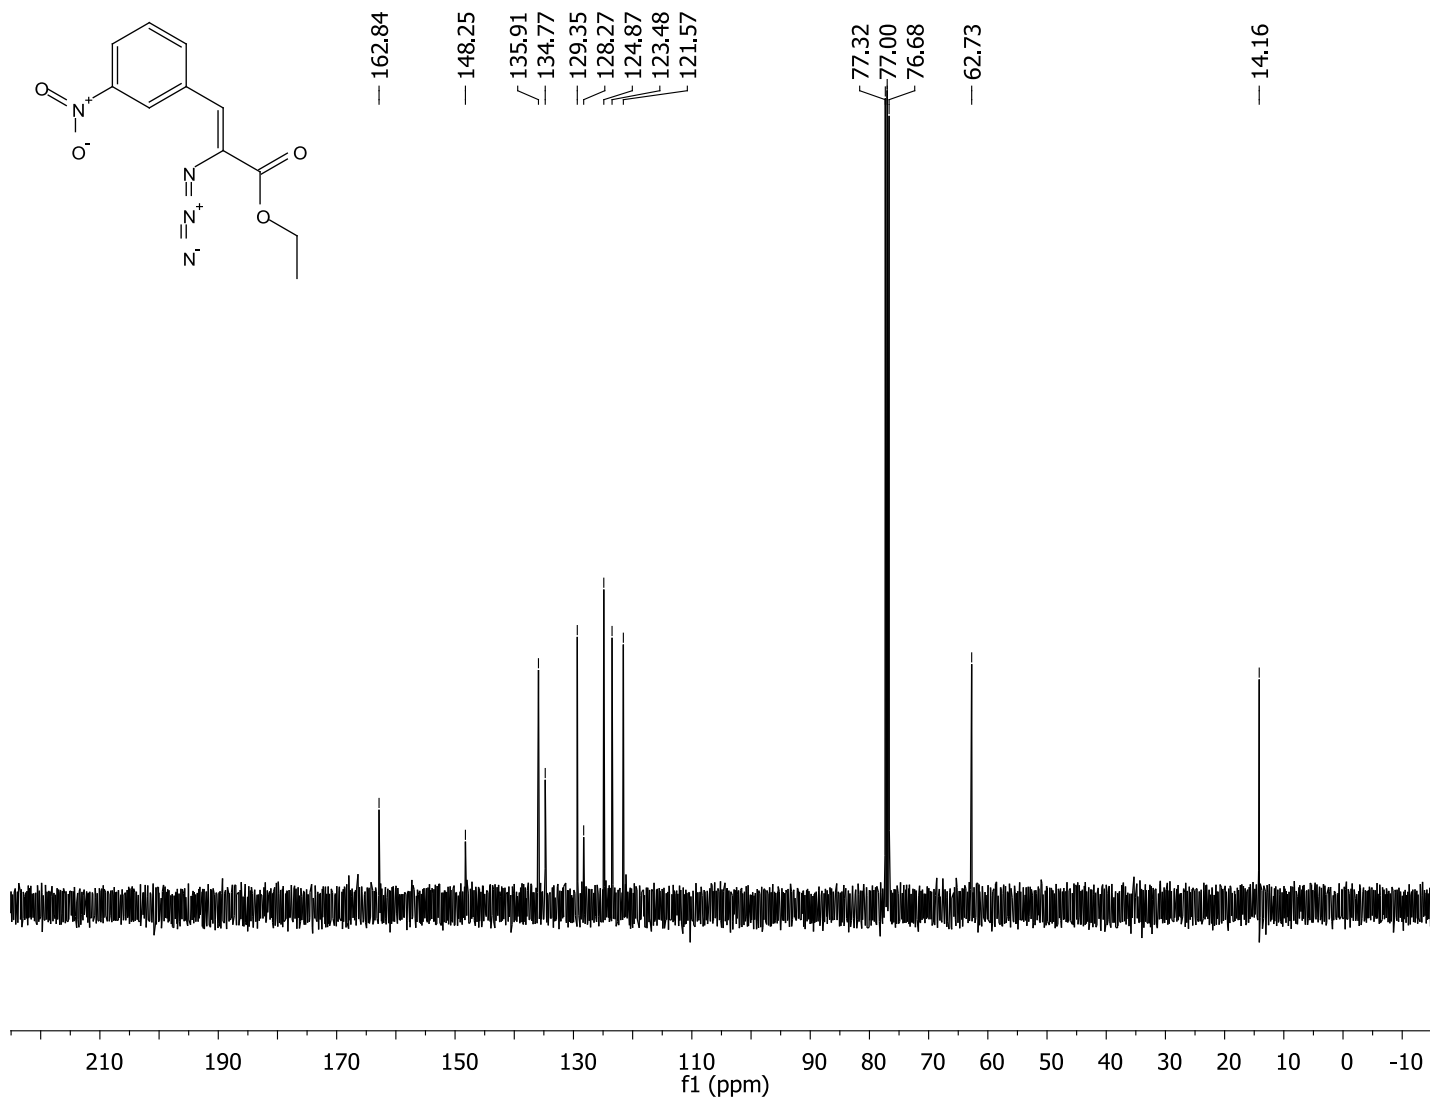

**$^1\text{H}$ - $^{13}\text{C}$  Coupled NMR: (Z)-Ethyl *meta*-nitro- $\alpha$ -azido- $\beta$ -phenylacrylate (2f)**

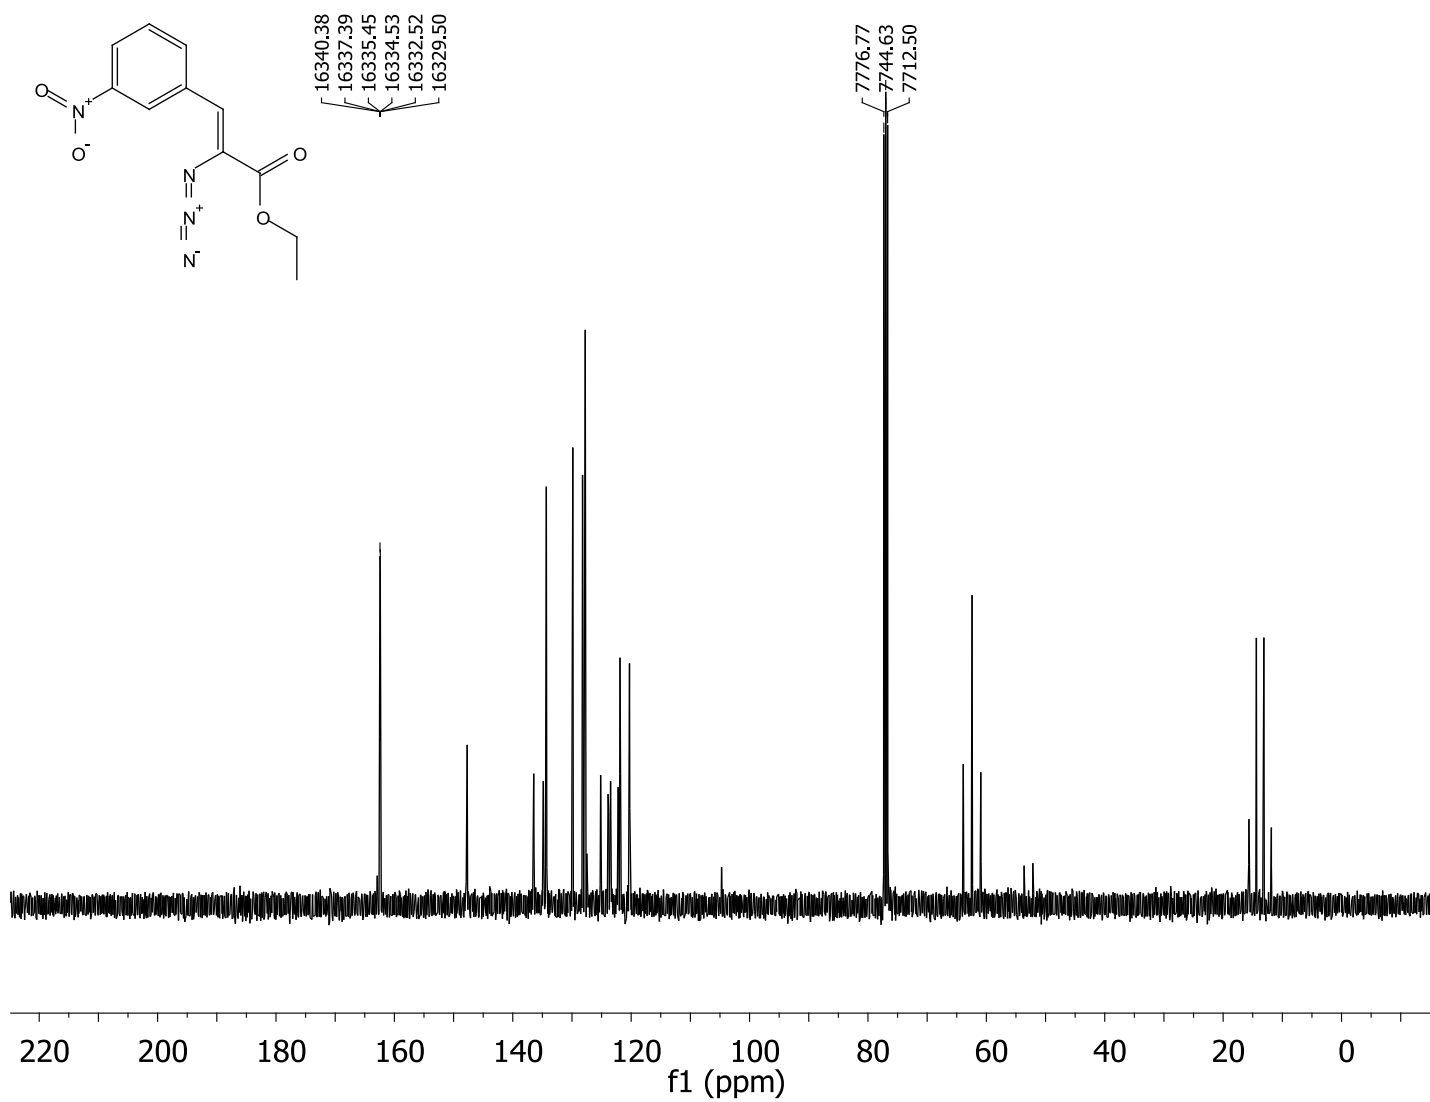

**$^3J_{C,H}$  of  $^1H$ - $^{13}C$  Coupled NMR: (Z)-Ethyl *meta*-nitro- $\alpha$ -azido- $\beta$ -phenylacrylate (2f)**

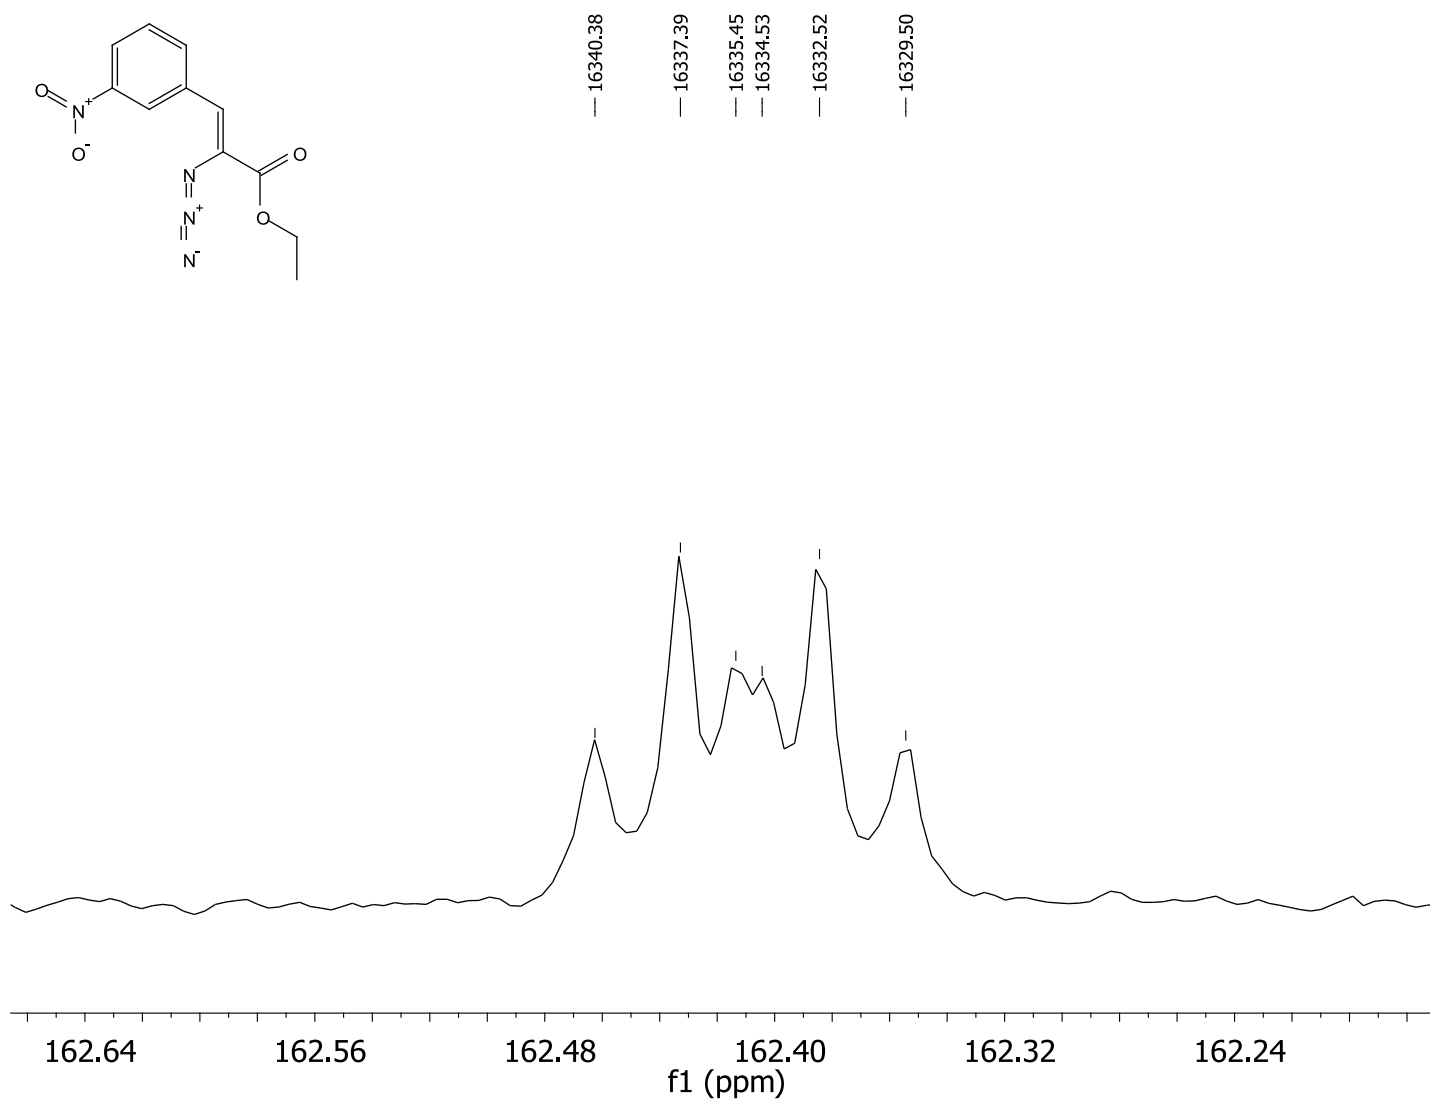



**<sup>1</sup>H NMR: (Z)-Ethyl *para*-methyl- $\alpha$ -azido- $\beta$ -phenylacrylate (2g)**

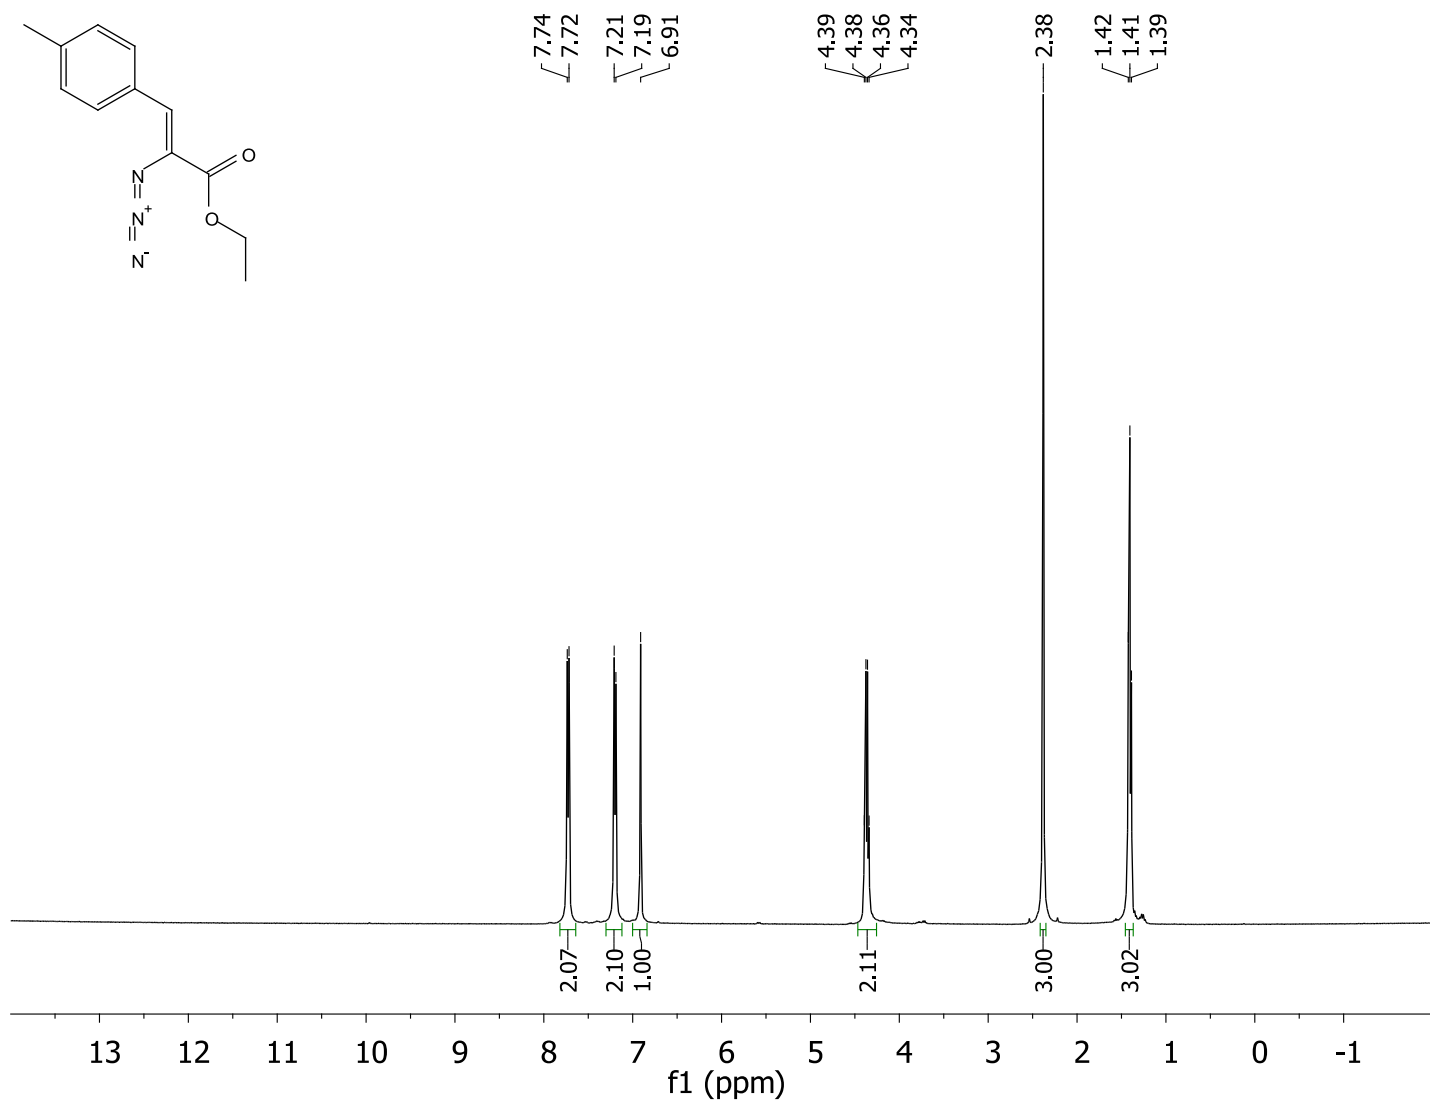

**$^{13}\text{C}$  NMR: (Z)-Ethyl *para*-methyl- $\alpha$ -azido- $\beta$ -phenylacrylate (2g)**

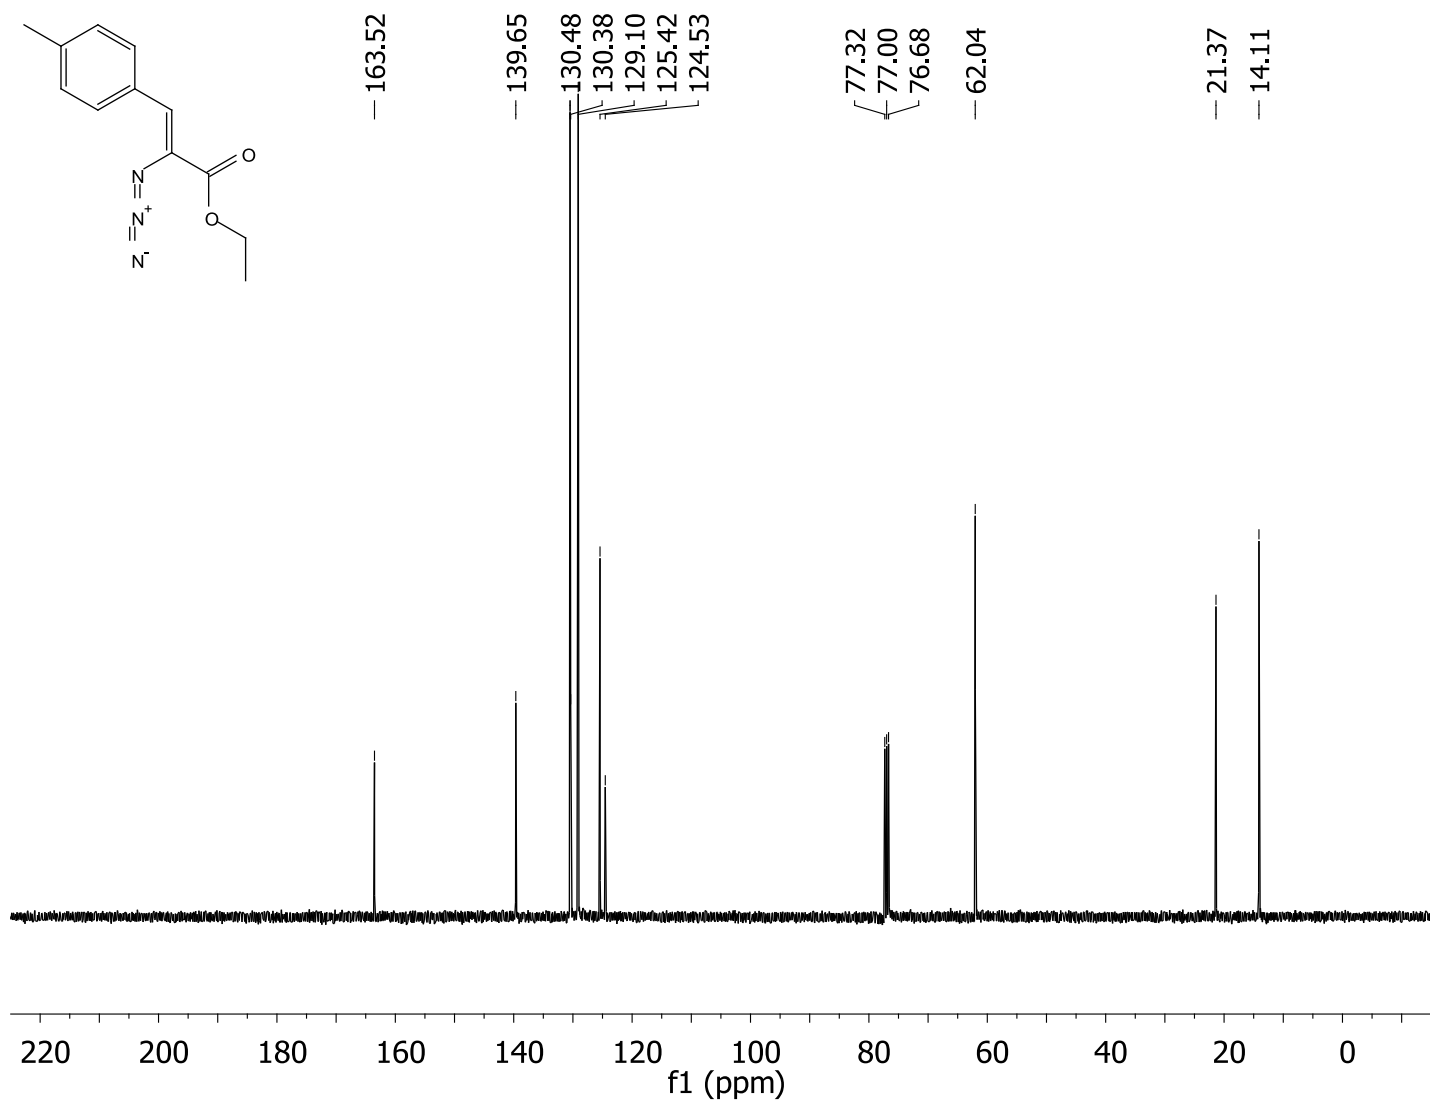

**<sup>1</sup>H NMR: (2Z,2'Z)-diethyl 3,3'-(1,3-phenylene)bis(2-azidoacrylate) (2h)**

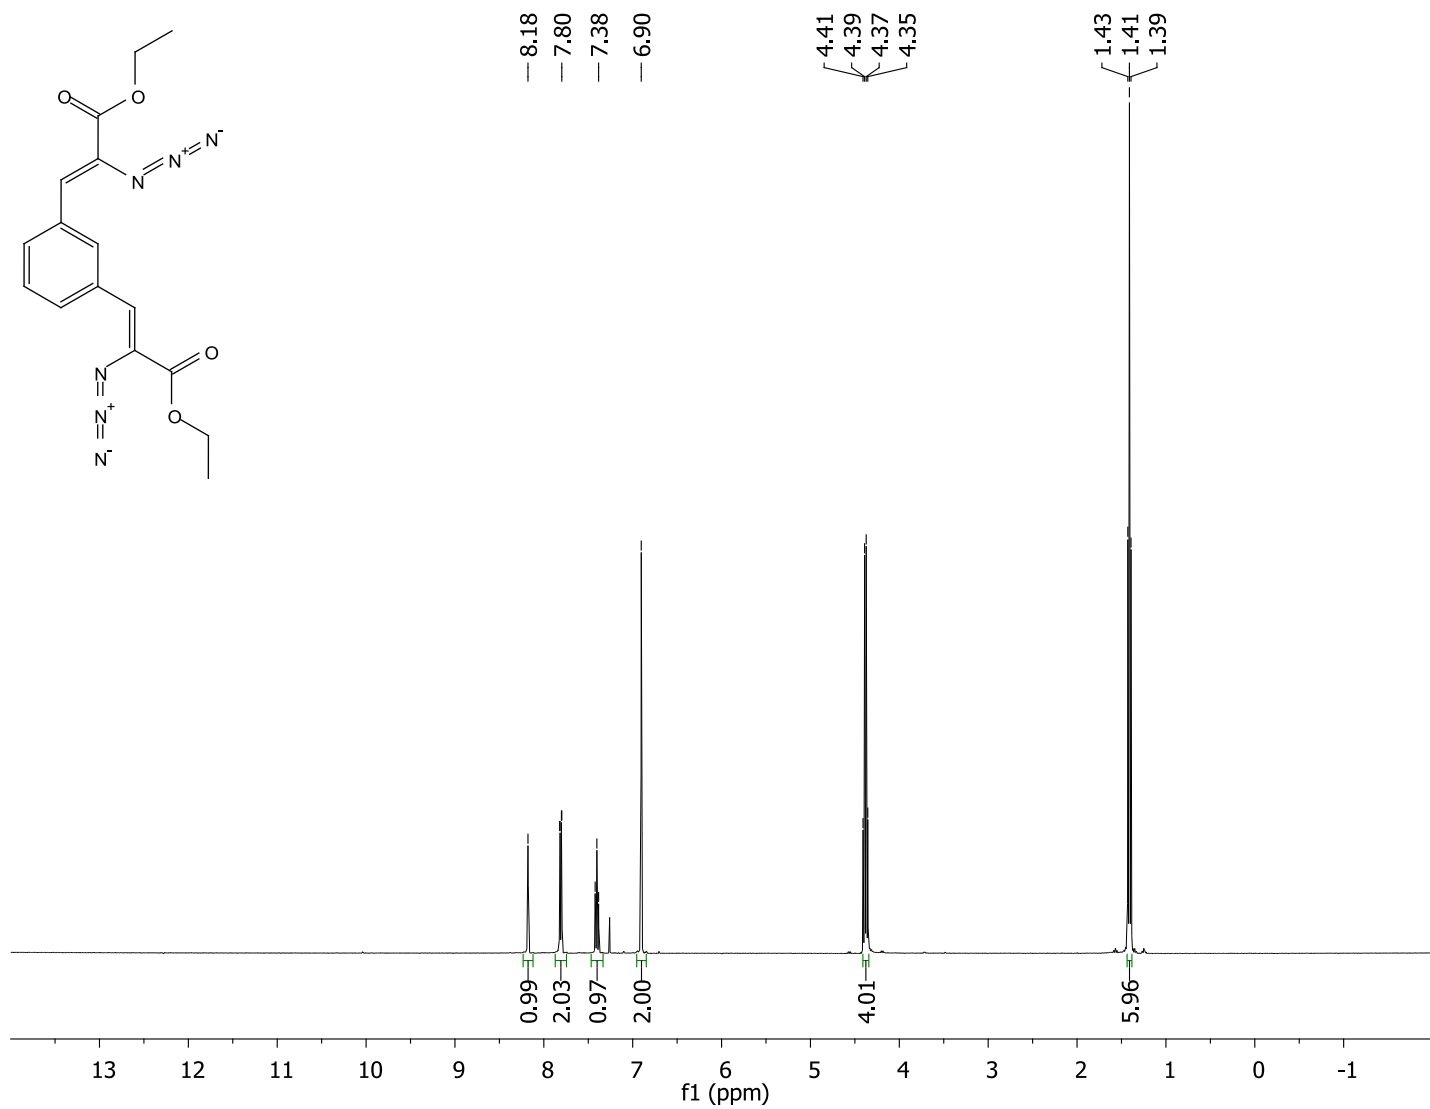

**$^{13}\text{C}$  NMR: (2Z,2'Z)-diethyl 3,3'-(1,3-phenylene)bis(2-azidoacrylate) (2h)**

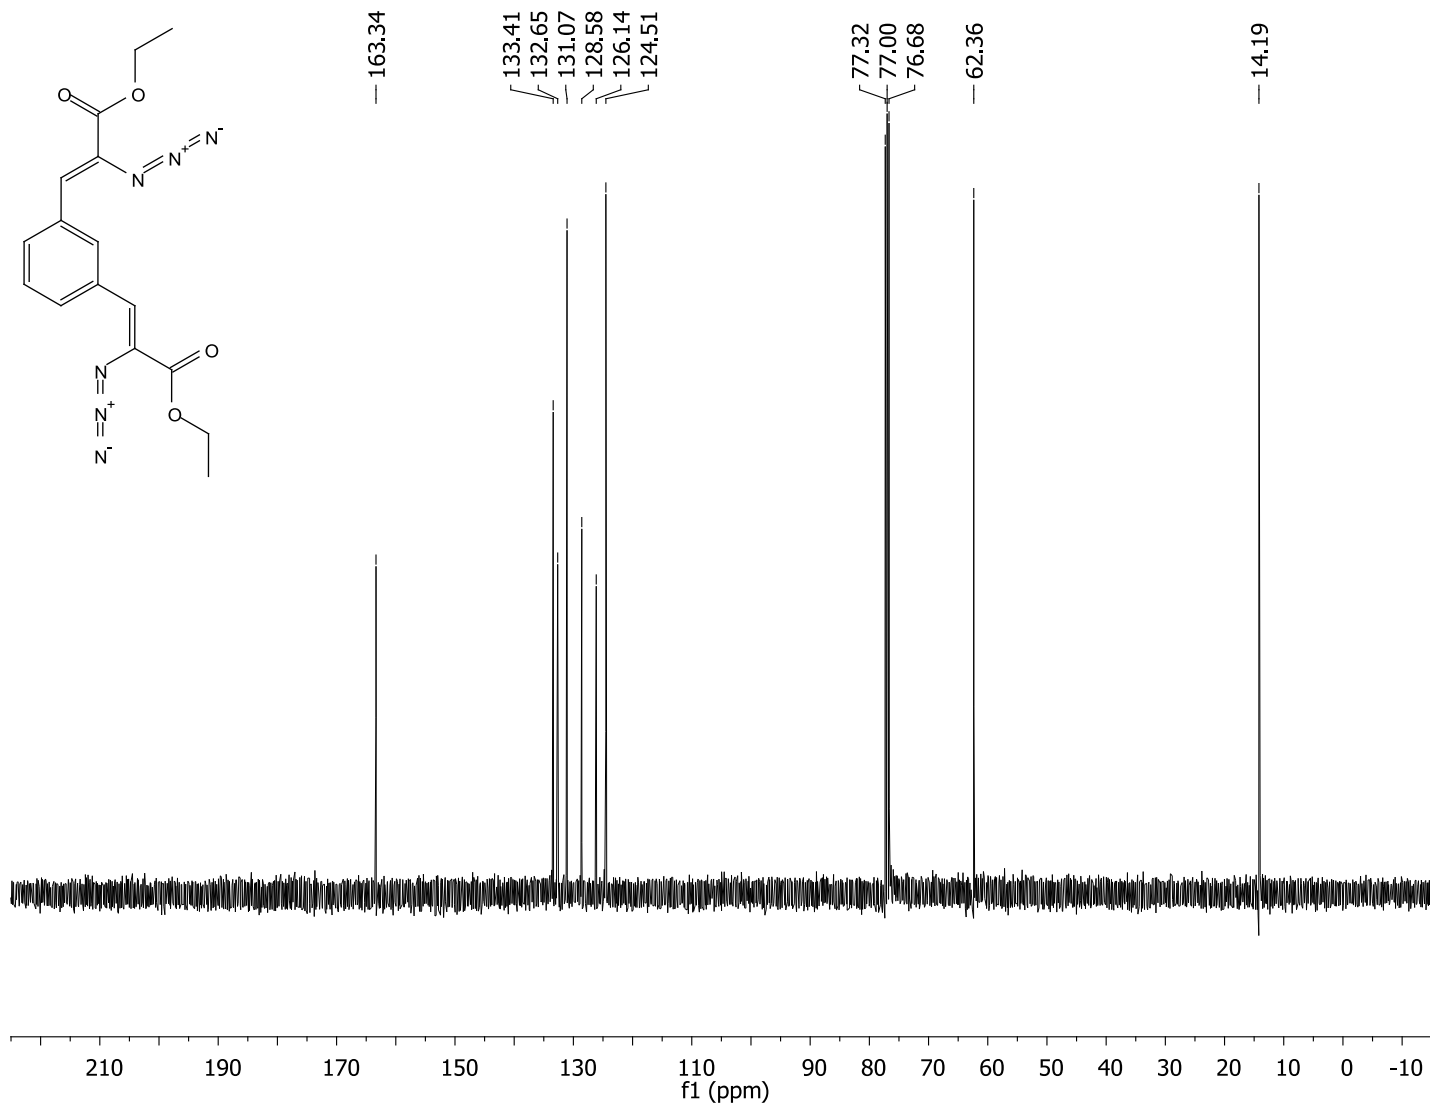

**$^3J_{C,H}$  of  $^1H$ - $^{13}C$  Coupled NMR: (2Z,2'Z)-diethyl 3,3'-(1,3-phenylene)bis(2-azidoacrylate) (2h)**

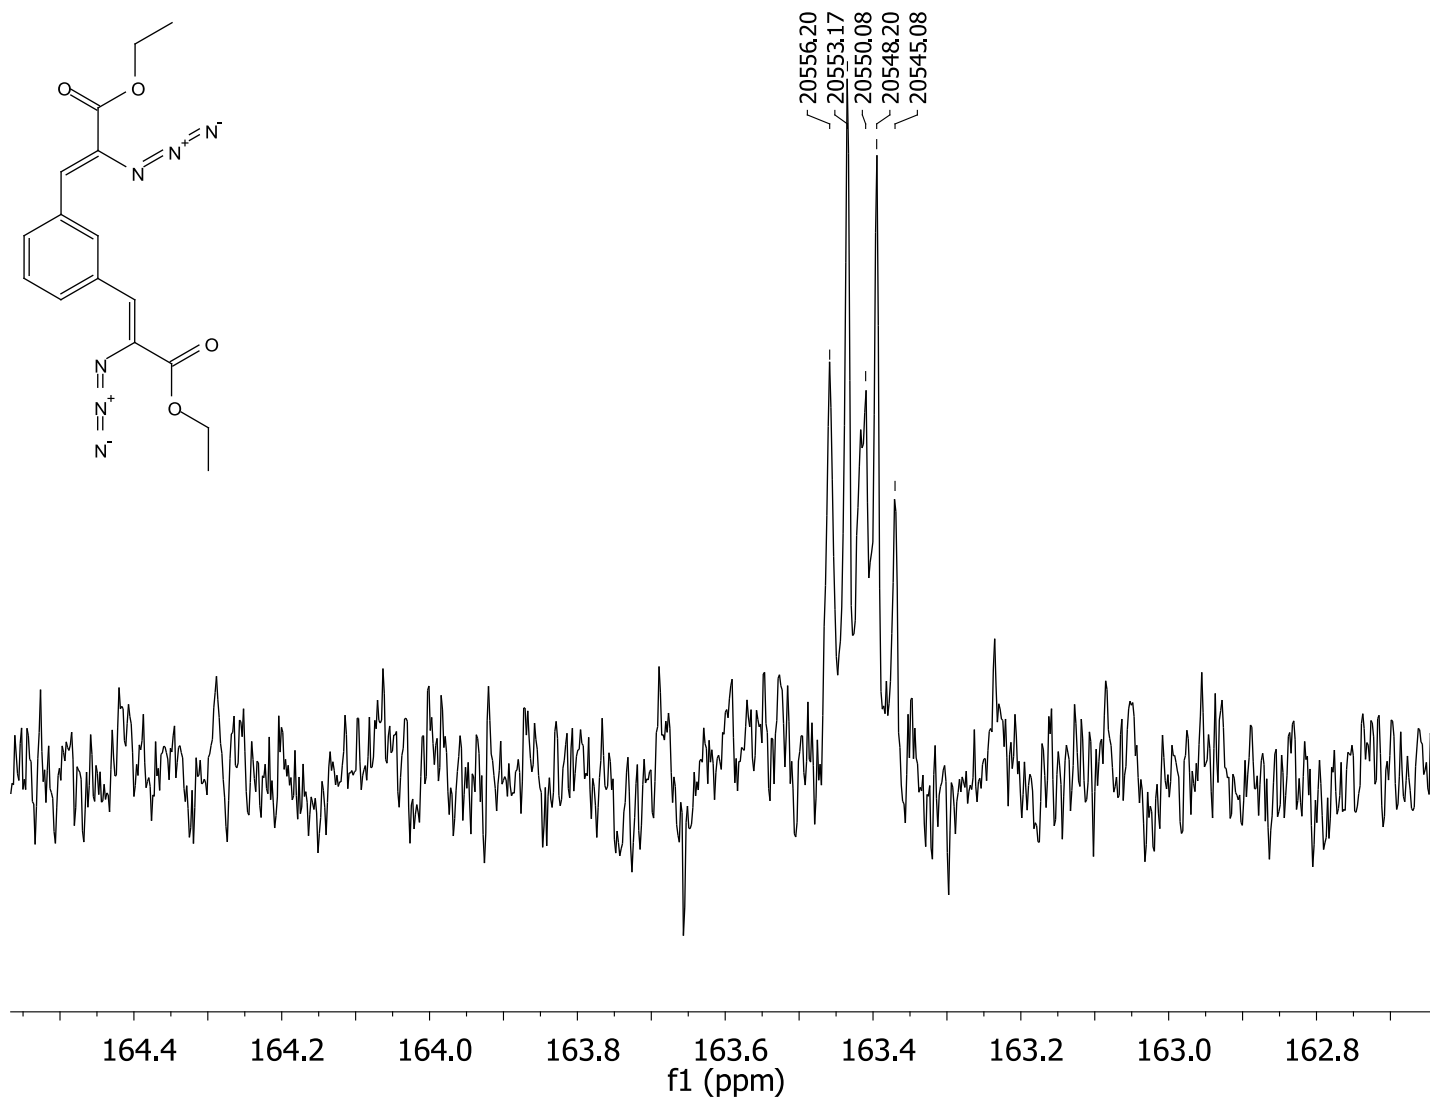

**<sup>1</sup>H NMR: (2Z,2'Z)-diethyl 3,3'-(1,4-phenylene)bis(2-azidoacrylate) (2i)**

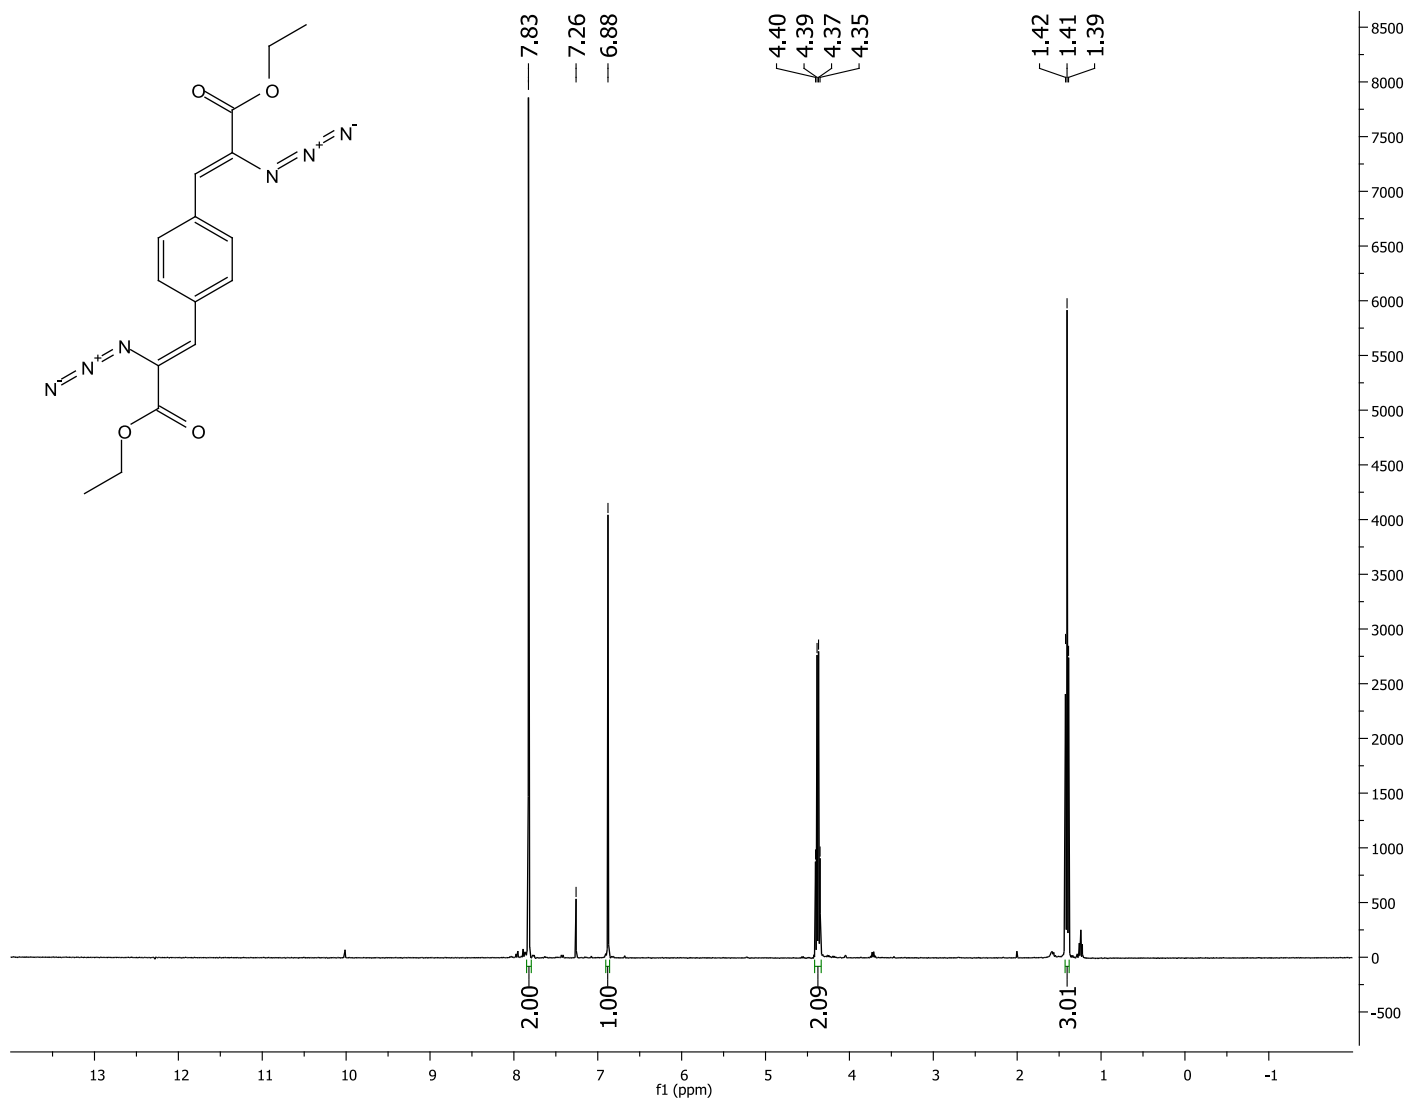

**$^{13}\text{C}$  NMR: (2Z,2'Z)-diethyl 3,3'-(1,4-phenylene)bis(2-azidoacrylate) (2i)**

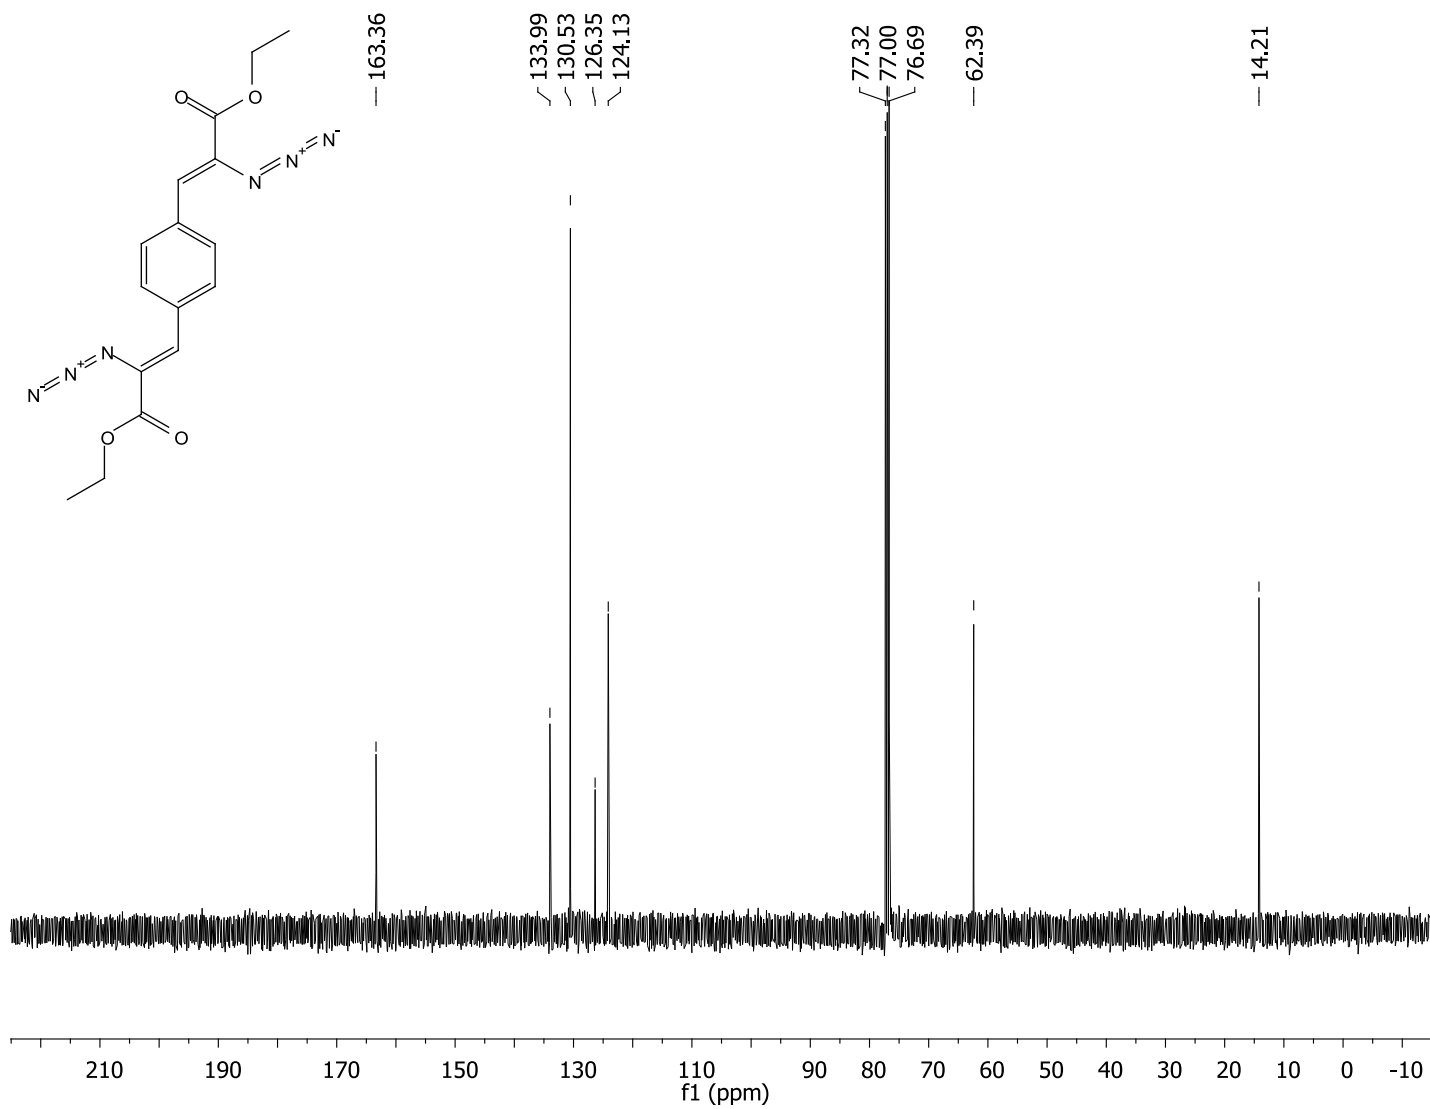

**$^3J_{C,H}$  of  $^1H$ - $^{13}C$  Coupled NMR: (2Z,2'Z)-diethyl 3,3'-(1,4-phenylene)bis(2-azidoacrylate) (2i)**

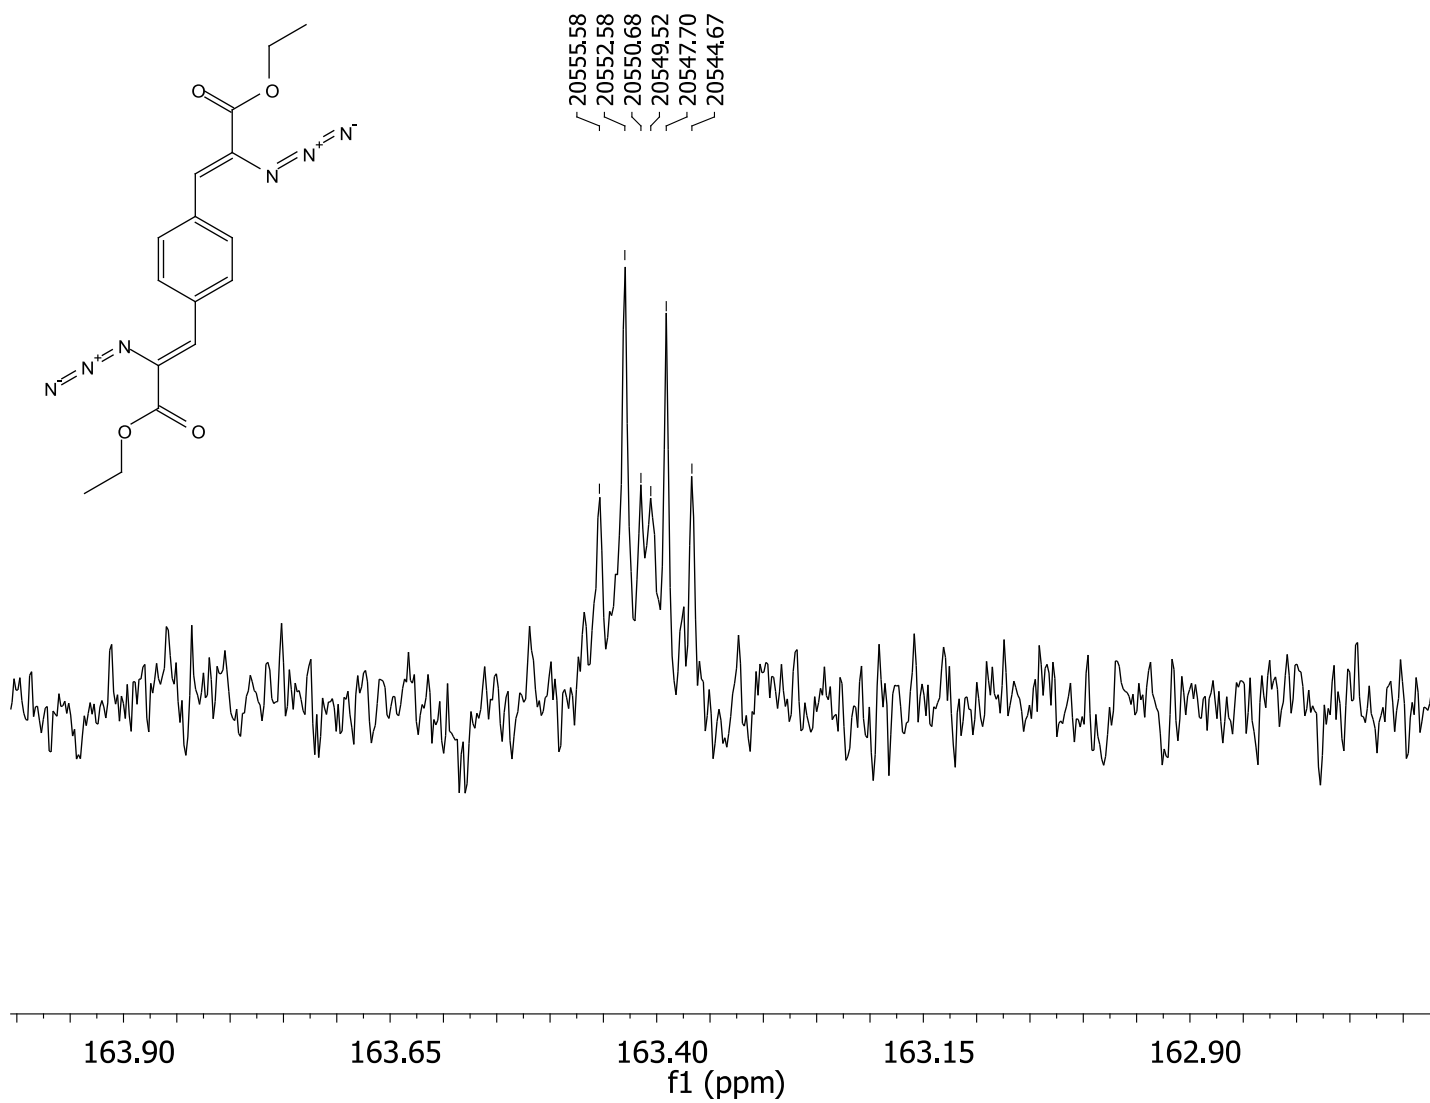



**<sup>1</sup>H NMR: (Z)-ethyl 2-azido-3-(furan-2-yl)acrylate (2j)**

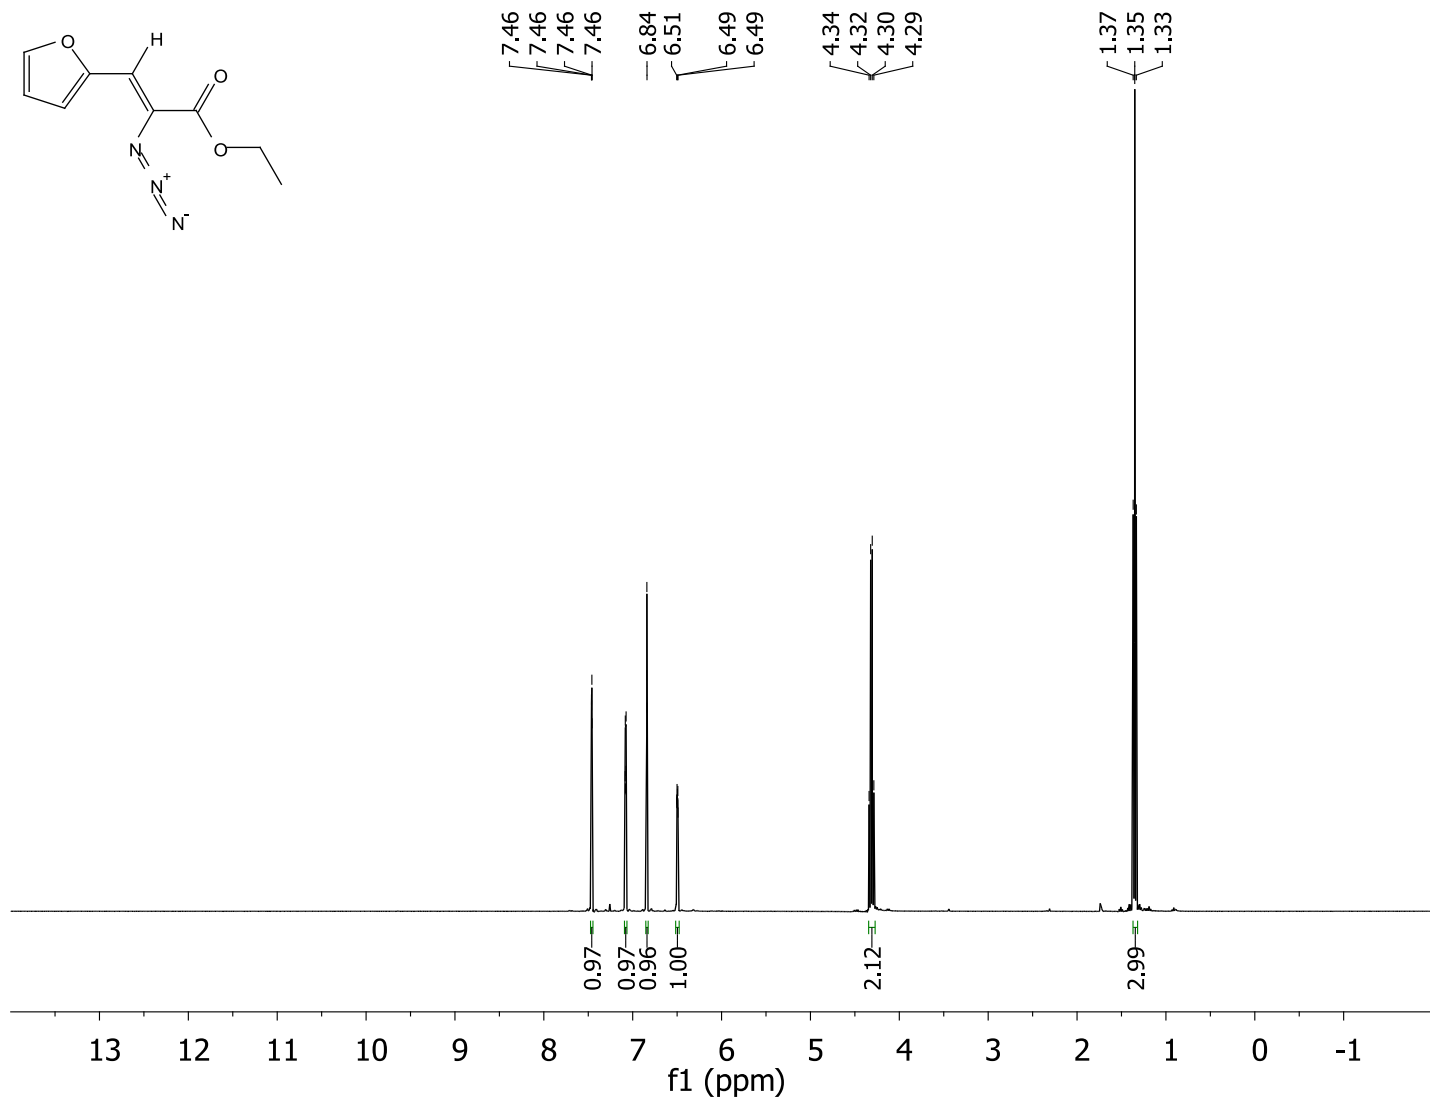

**$^{13}\text{C}$  NMR: (Z)-ethyl 2-azido-3-(furan-2-yl)acrylate (2j)**

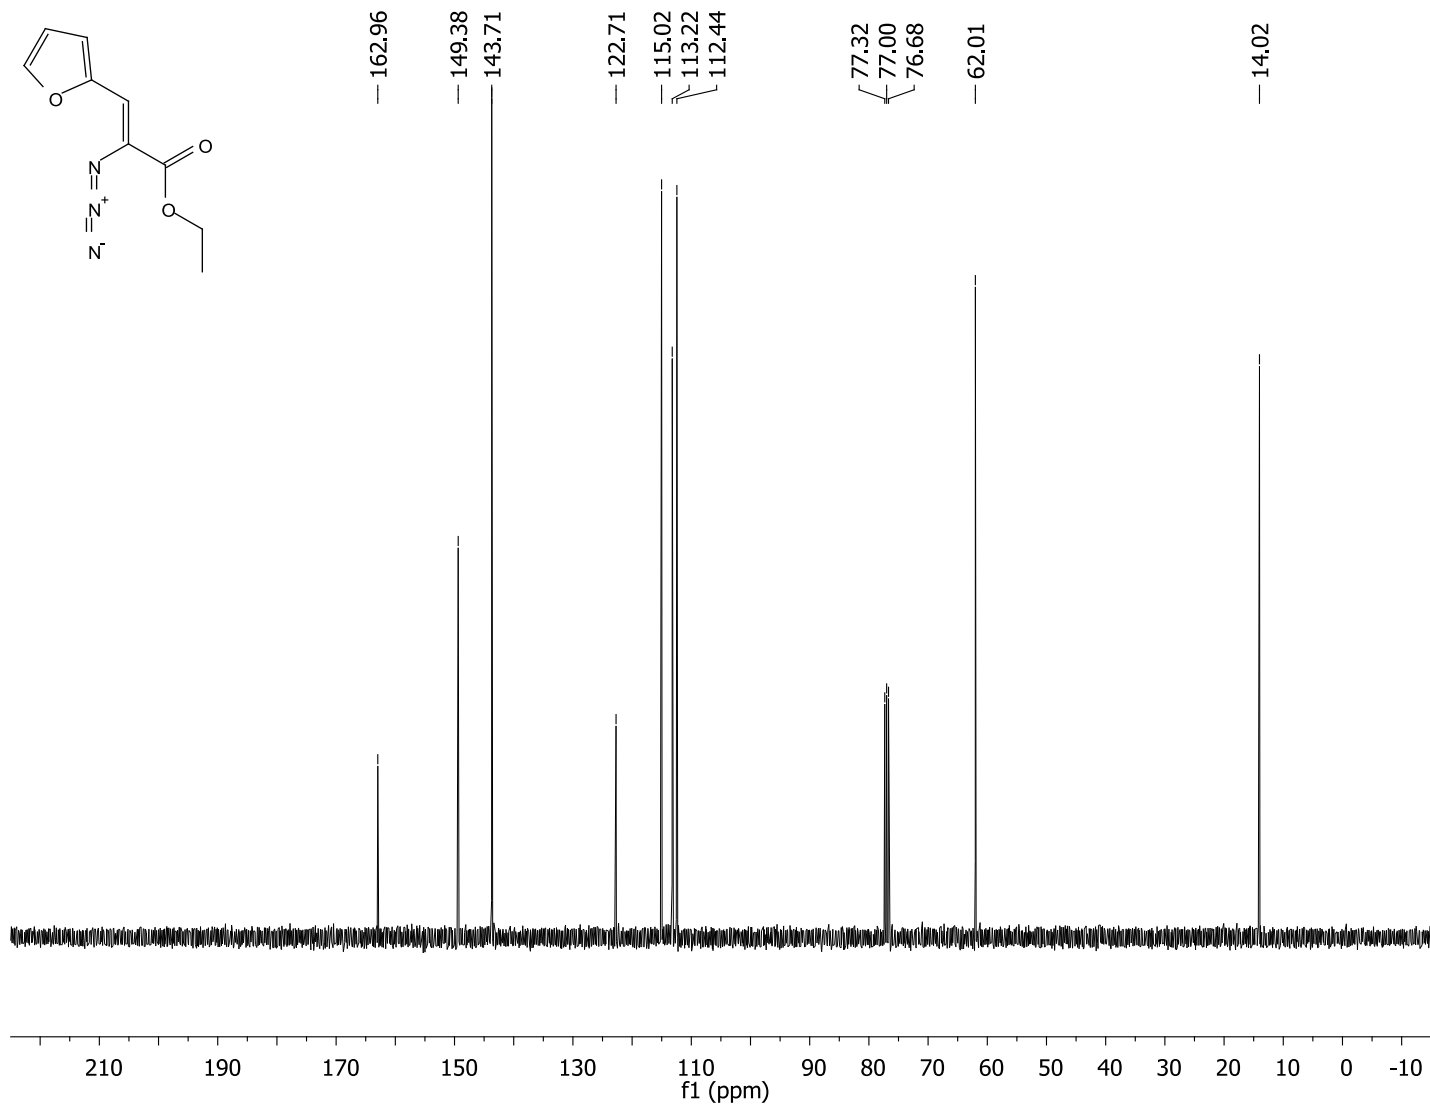

**$^1\text{H}$ - $^{13}\text{C}$  Coupled NMR: (Z)-ethyl 2-azido-3-(furan-2-yl)acrylate (2j)**

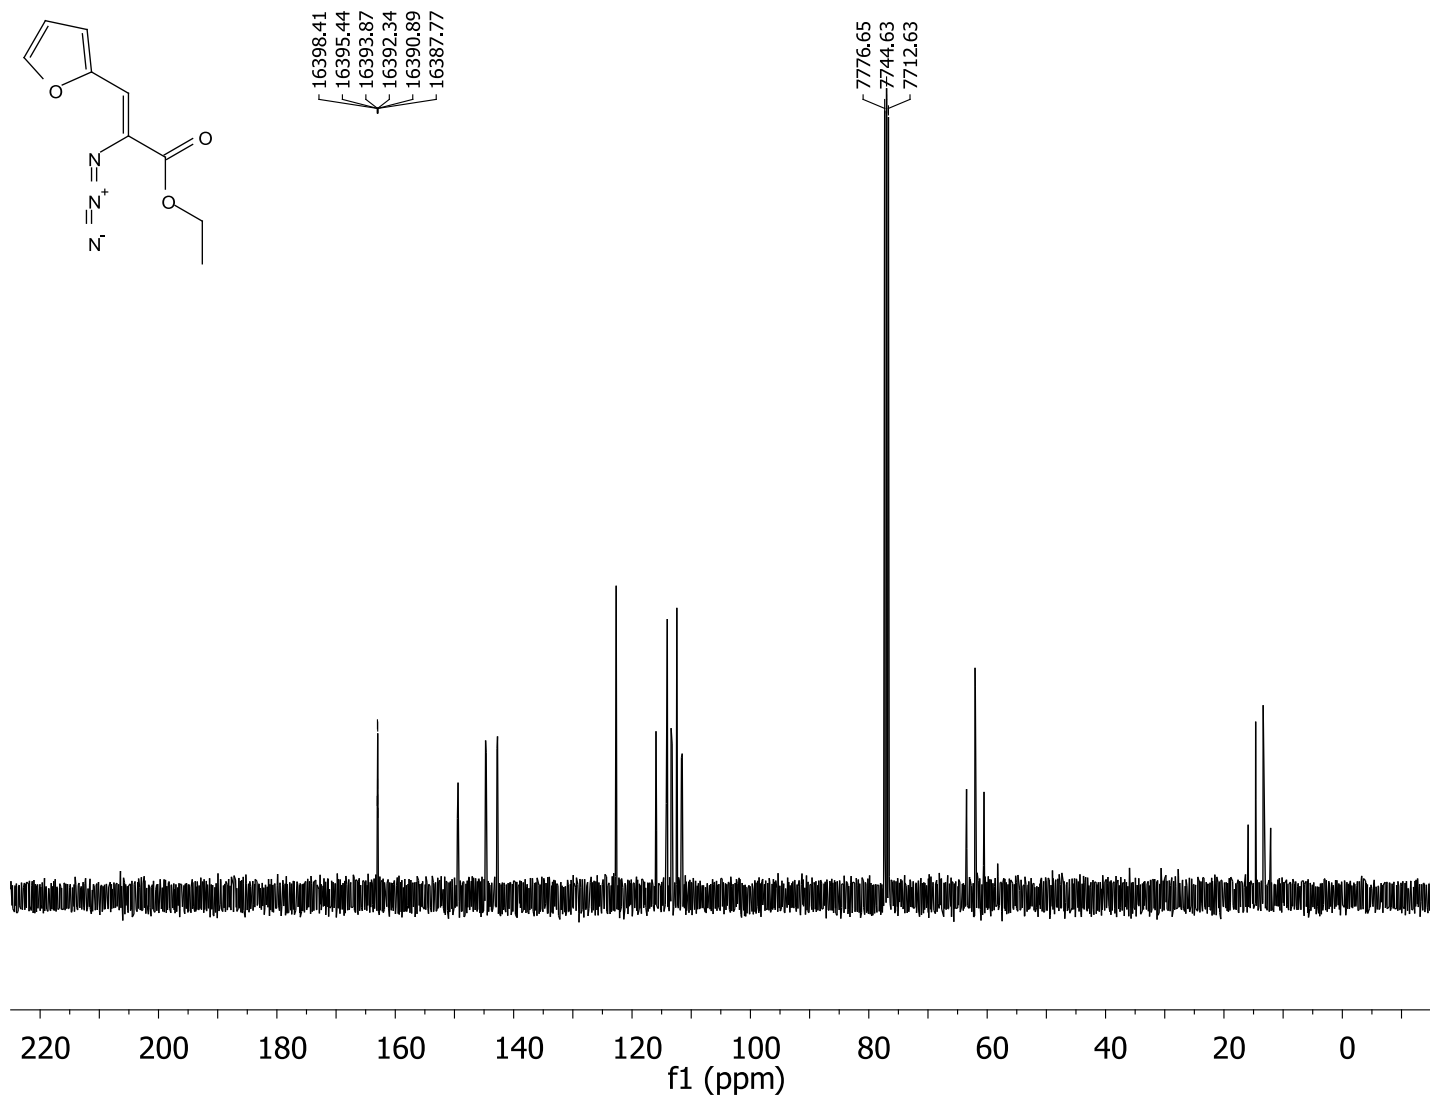

**$^3J_{C,H}$  of  $^1H$ - $^{13}C$  Coupled NMR: (Z)-ethyl 2-azido-3-(furan-2-yl)acrylate (2j)**

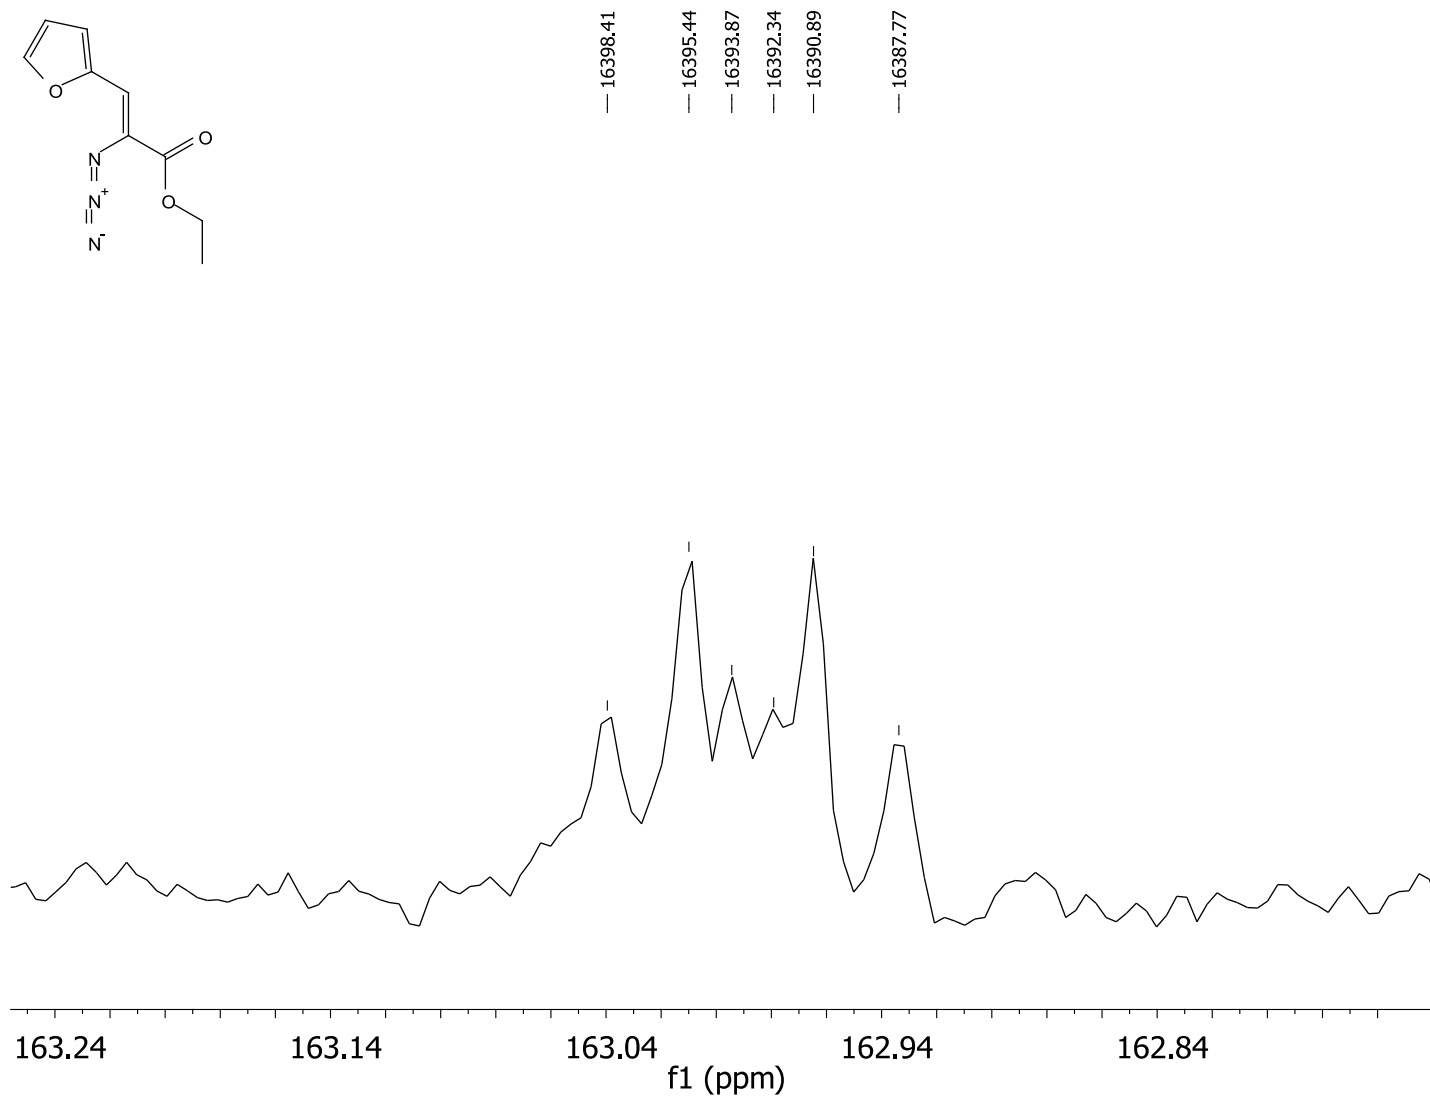

## Section 2:

### NMR and Mass Spectroscopy of

### (Z)-ethyl 2-(3-nitrobenzamido)-3-(3-nitrophenyl)acrylate

#### <sup>1</sup>H NMR

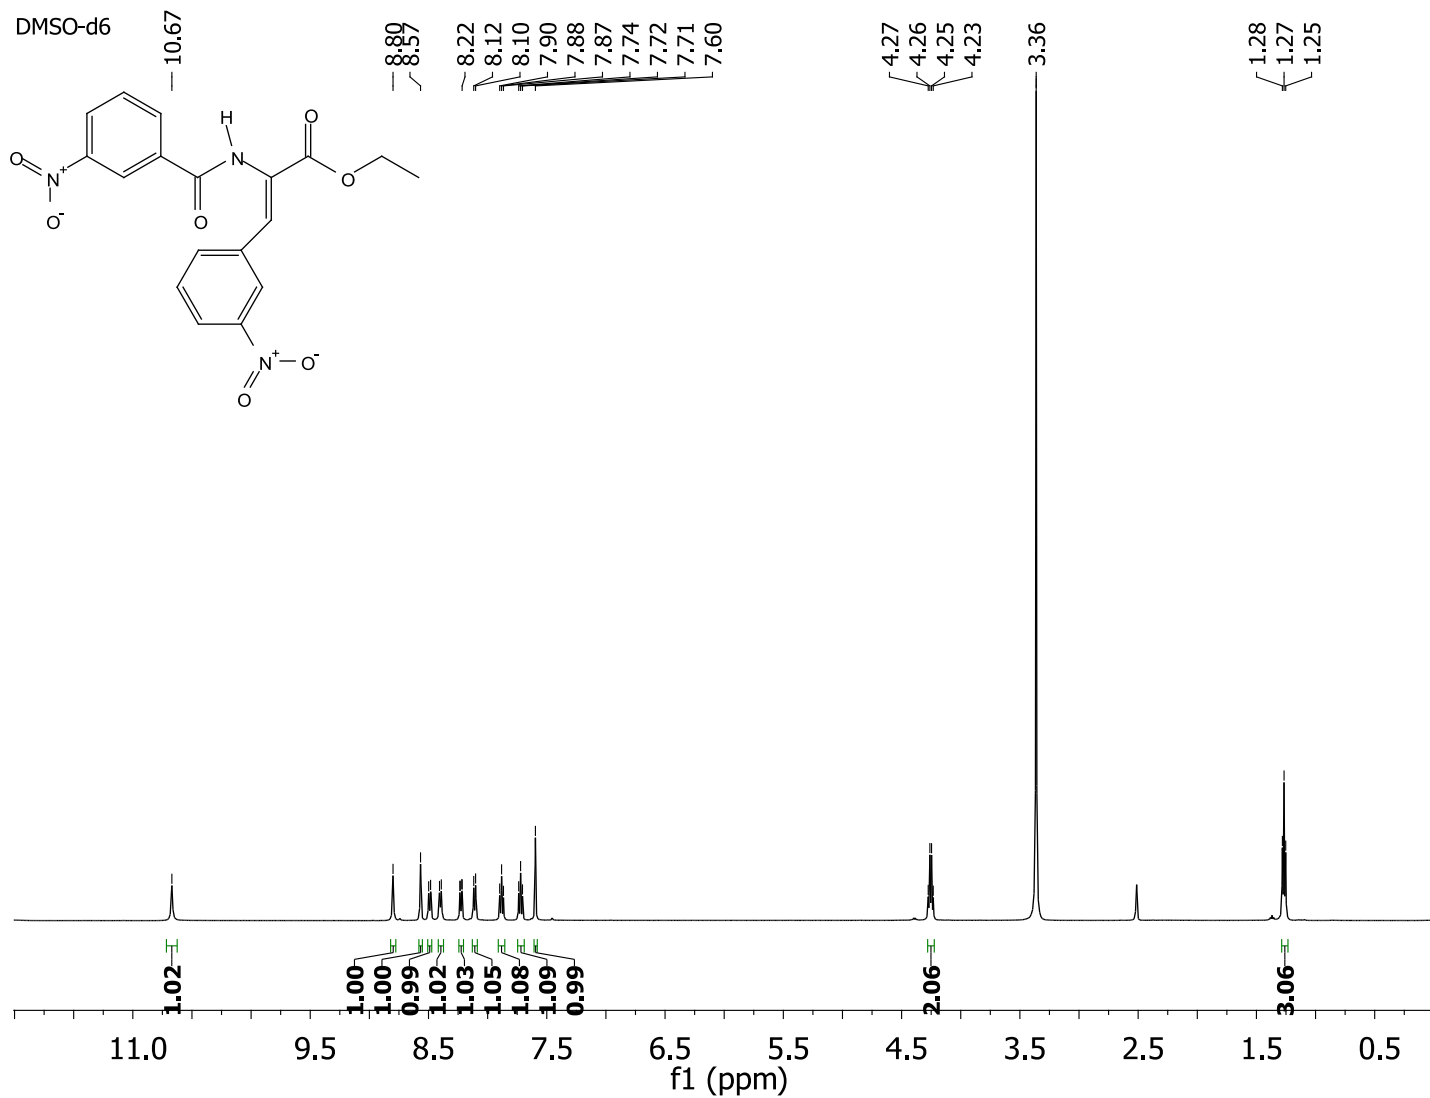

**<sup>13</sup>C NMR: (Z)-ethyl 2-(3-nitrobenzamido)-3-(3-nitrophenyl)acrylate**

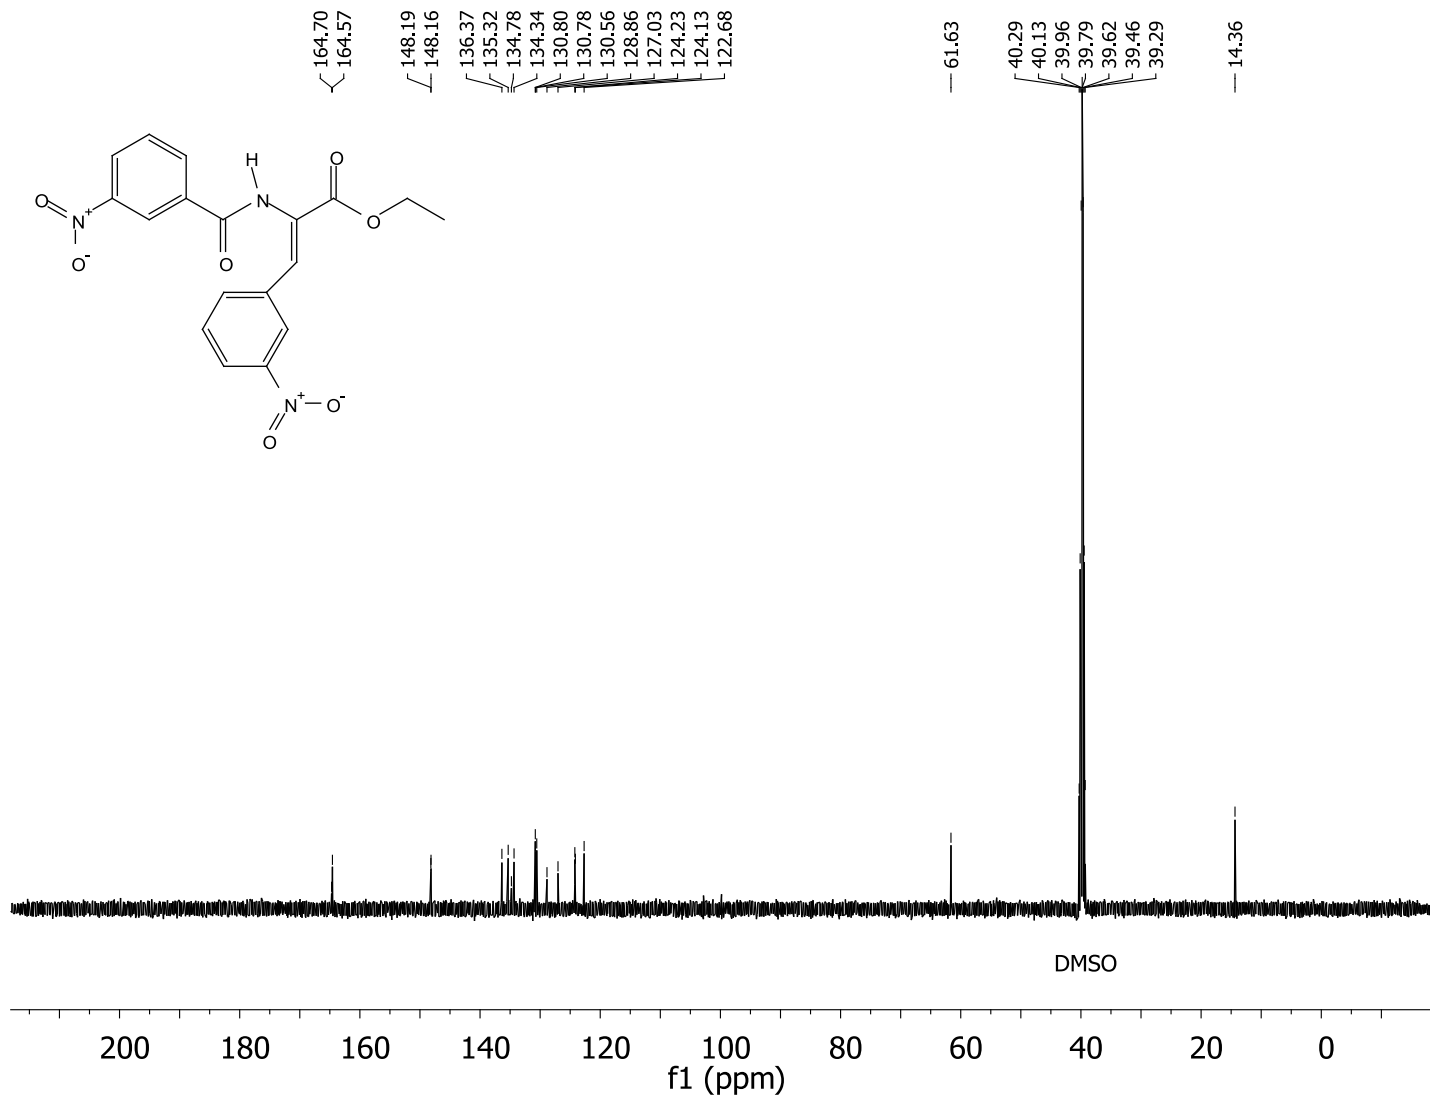

### Mass Spectrometry (EI+): (Z)-ethyl 2-(3-nitrobenzamido)-3-(3-nitrophenyl)acrylate

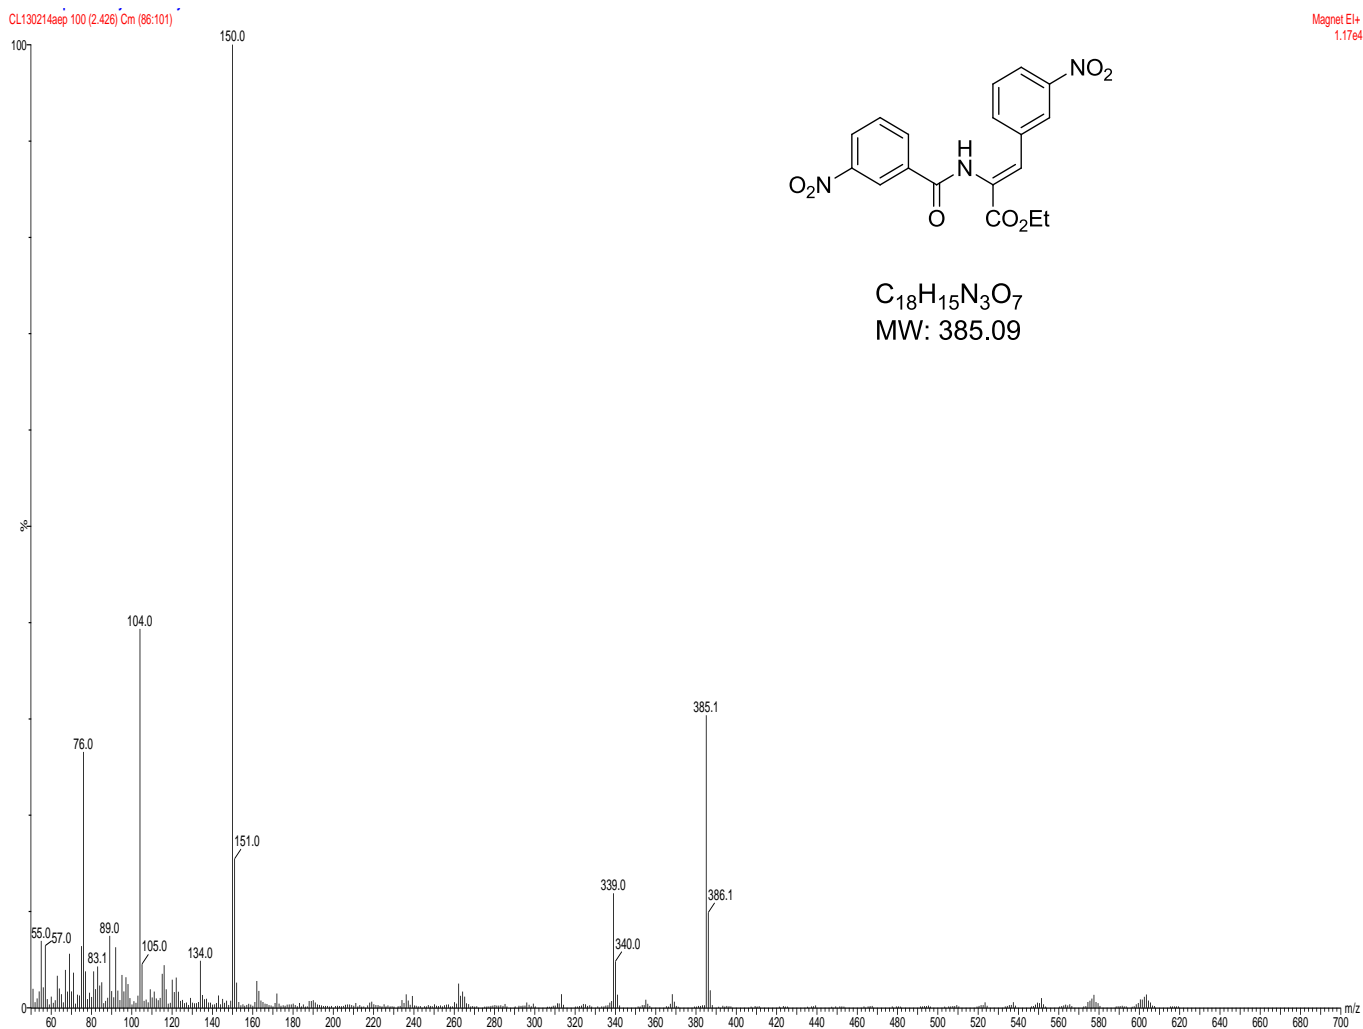

### Section 3:

#### *NMR (1-D and 2-D) of diethyl 1,6-dihydropyrrolo[2,3-e]indole-2,7-dicarboxylate, 3j*

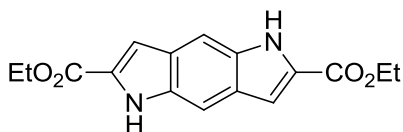

<sup>1</sup>H NMR

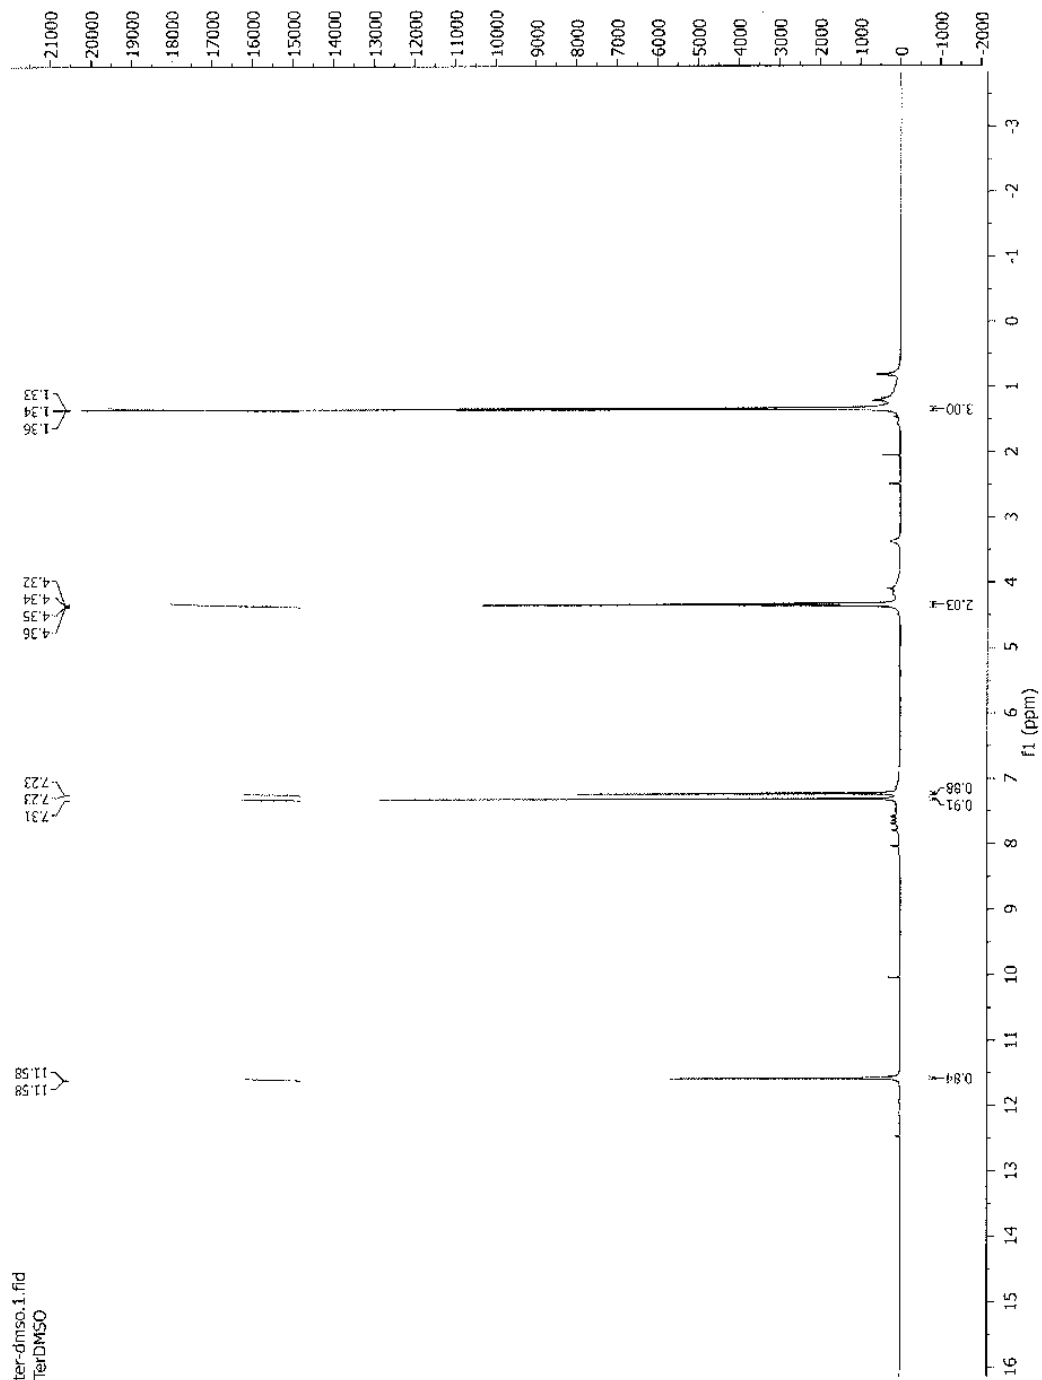



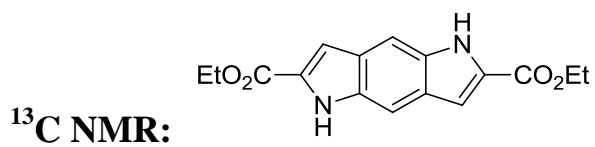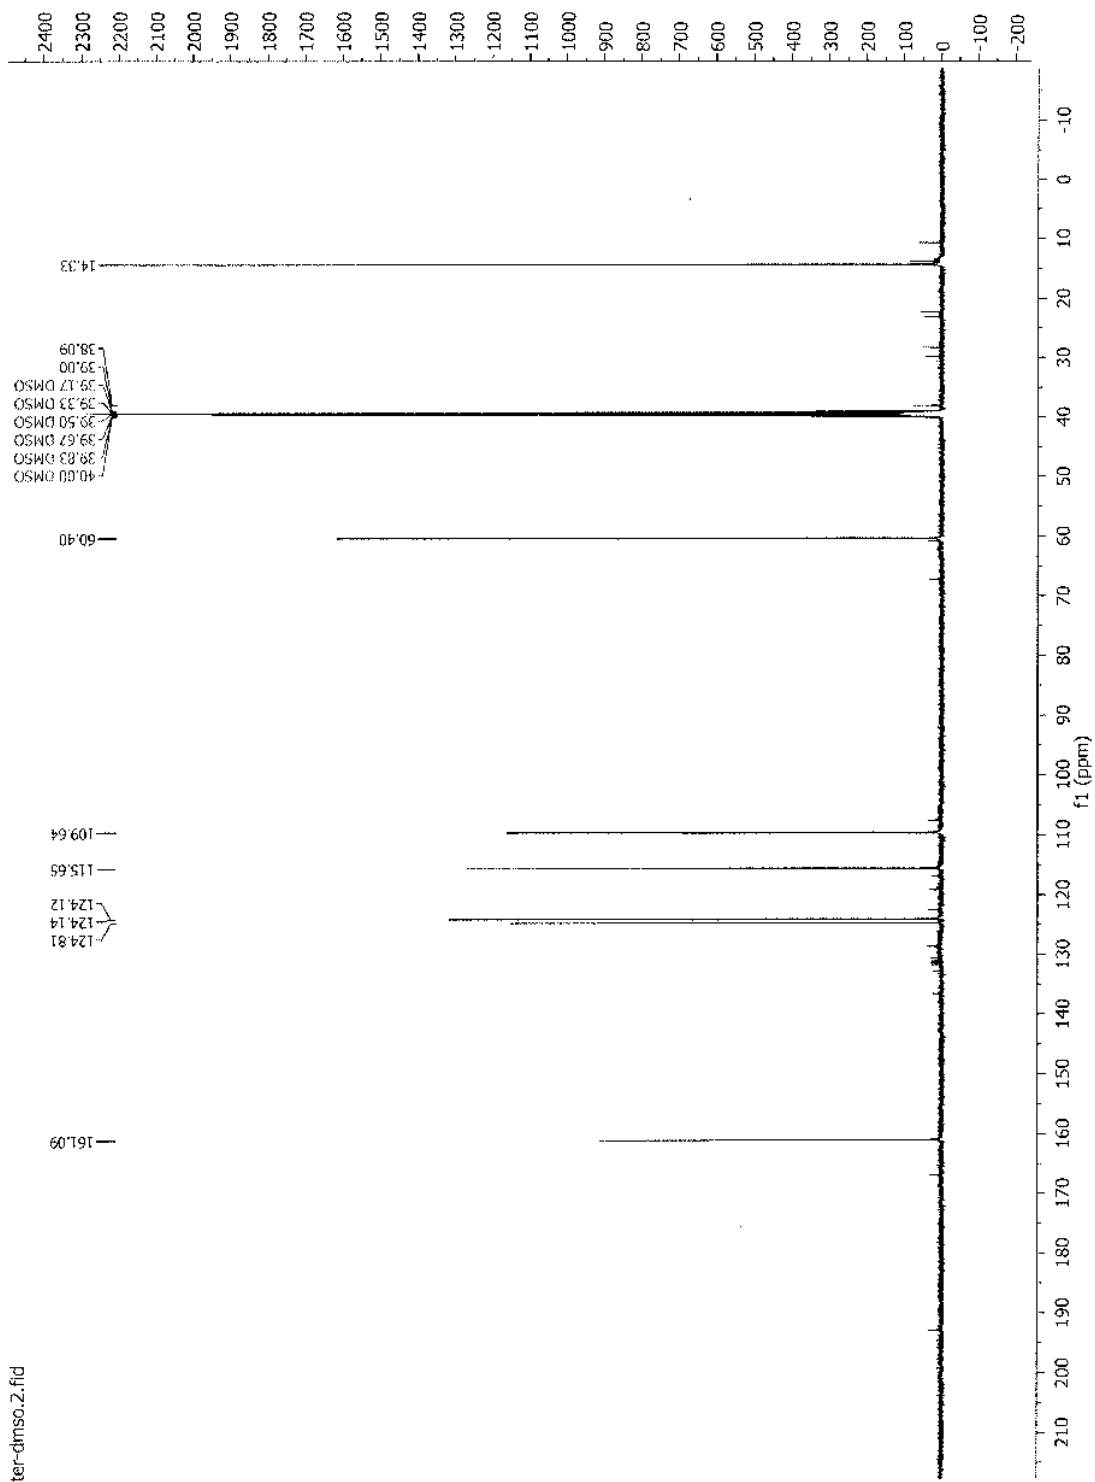

**<sup>13</sup>C NMR, 124-125 ppm:**

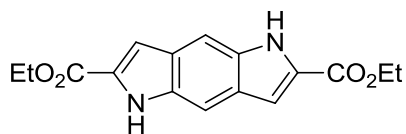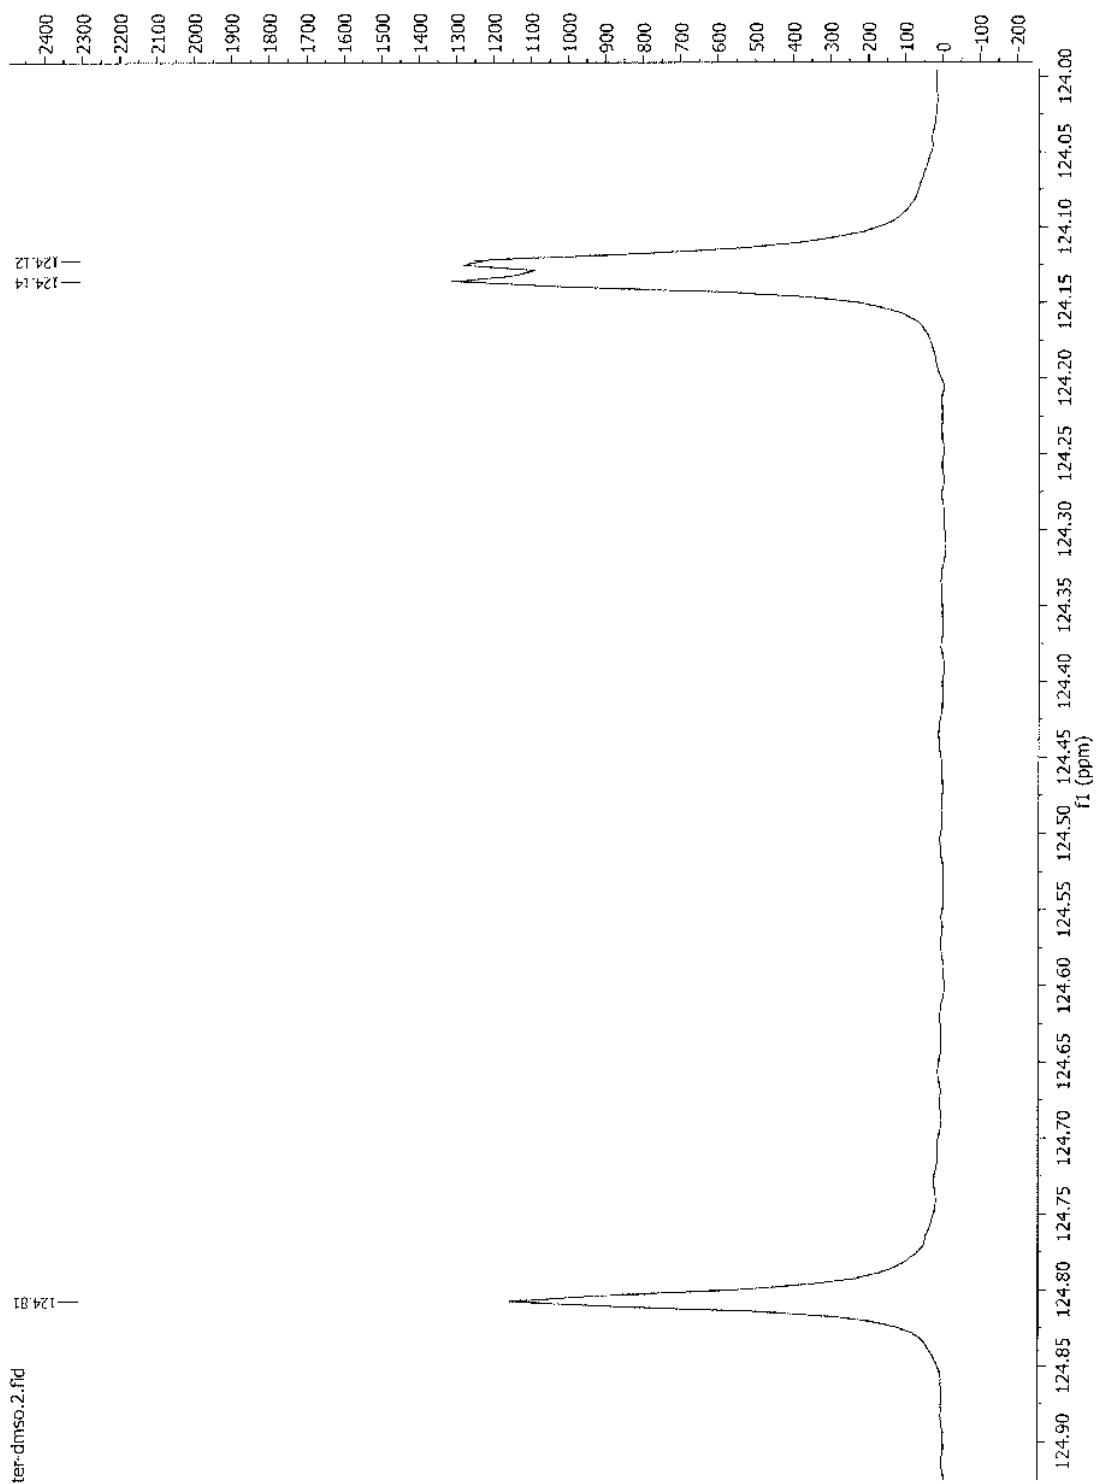

**$^{13}\text{C}$ -DEPT NMR:**

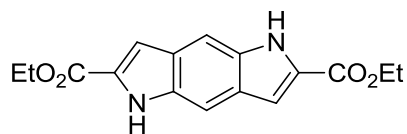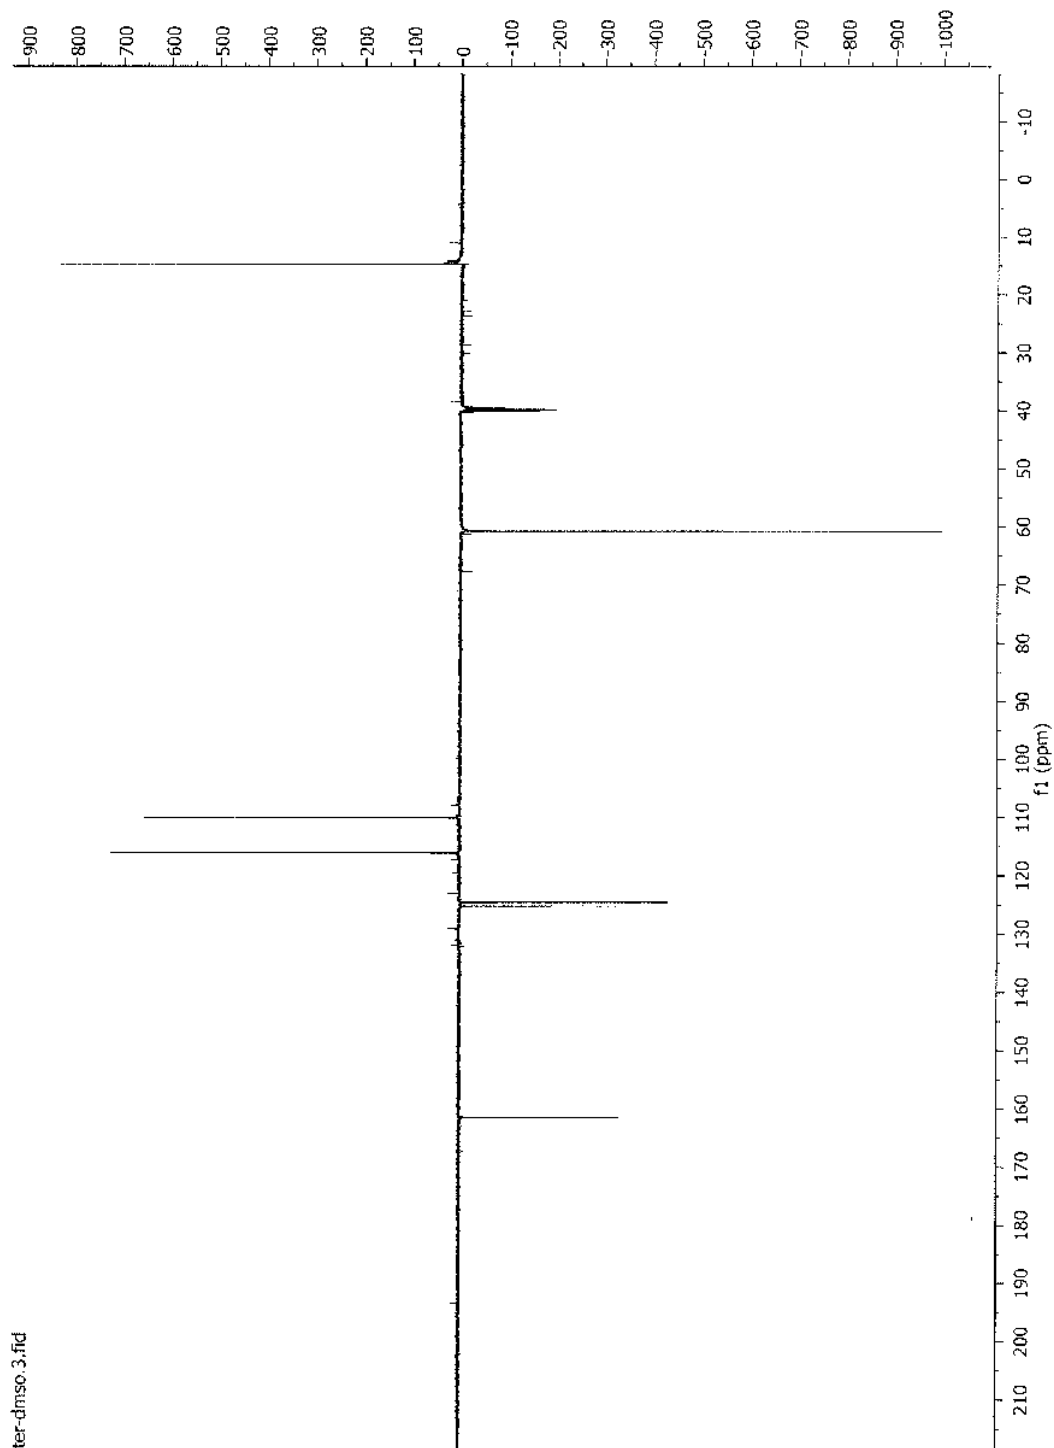

**$^{13}\text{C}$ -DEPT NMR, 124-126 ppm:**

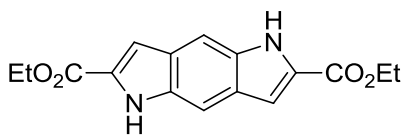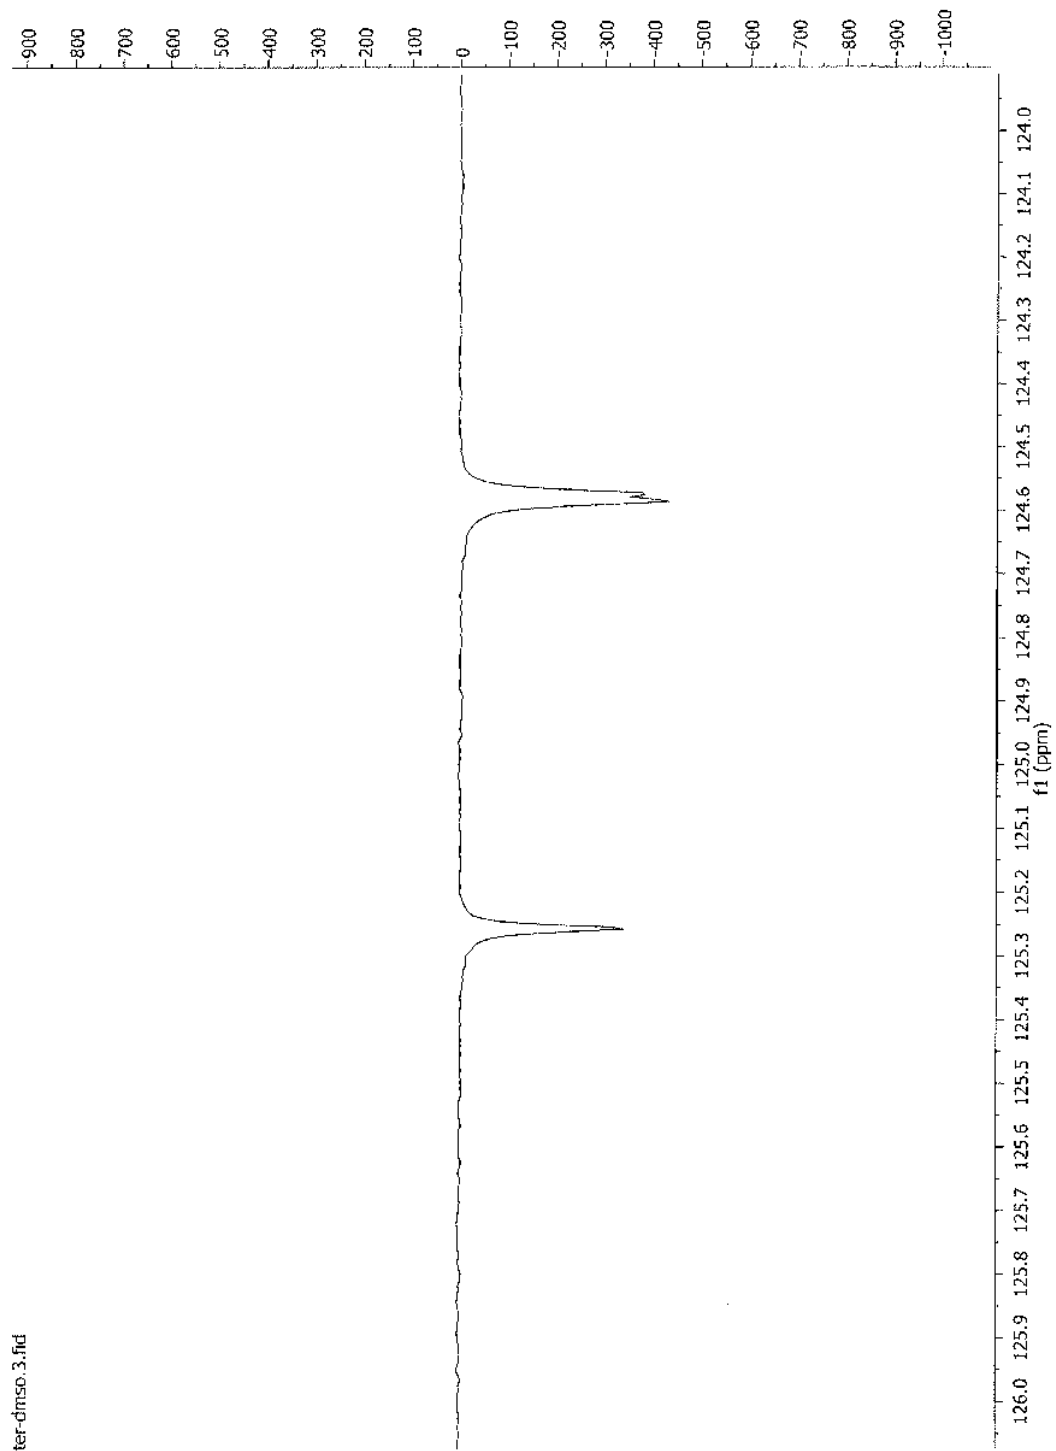

$^1\text{H}$ - $^{13}\text{C}$  HMQC:

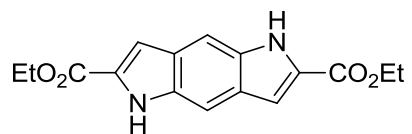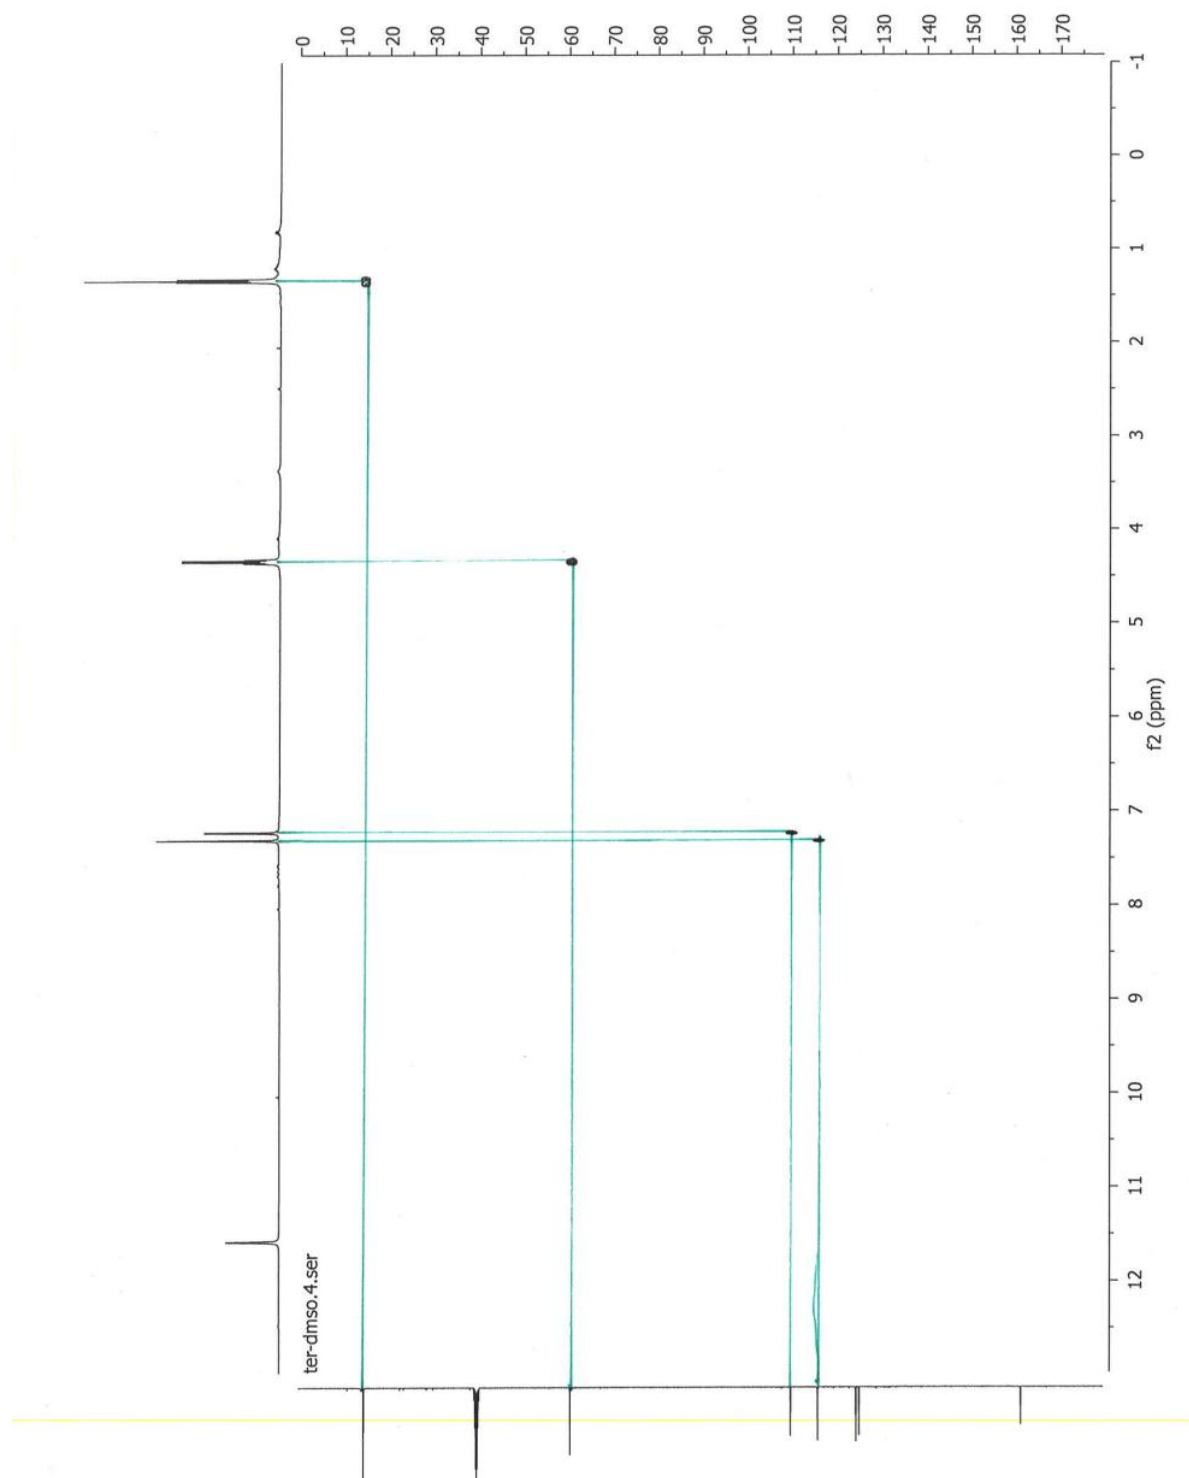

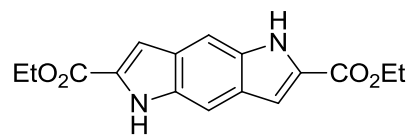

**<sup>1</sup>H-<sup>1</sup>H COSY and <sup>1</sup>H-<sup>13</sup>C HMQC Overlay:**

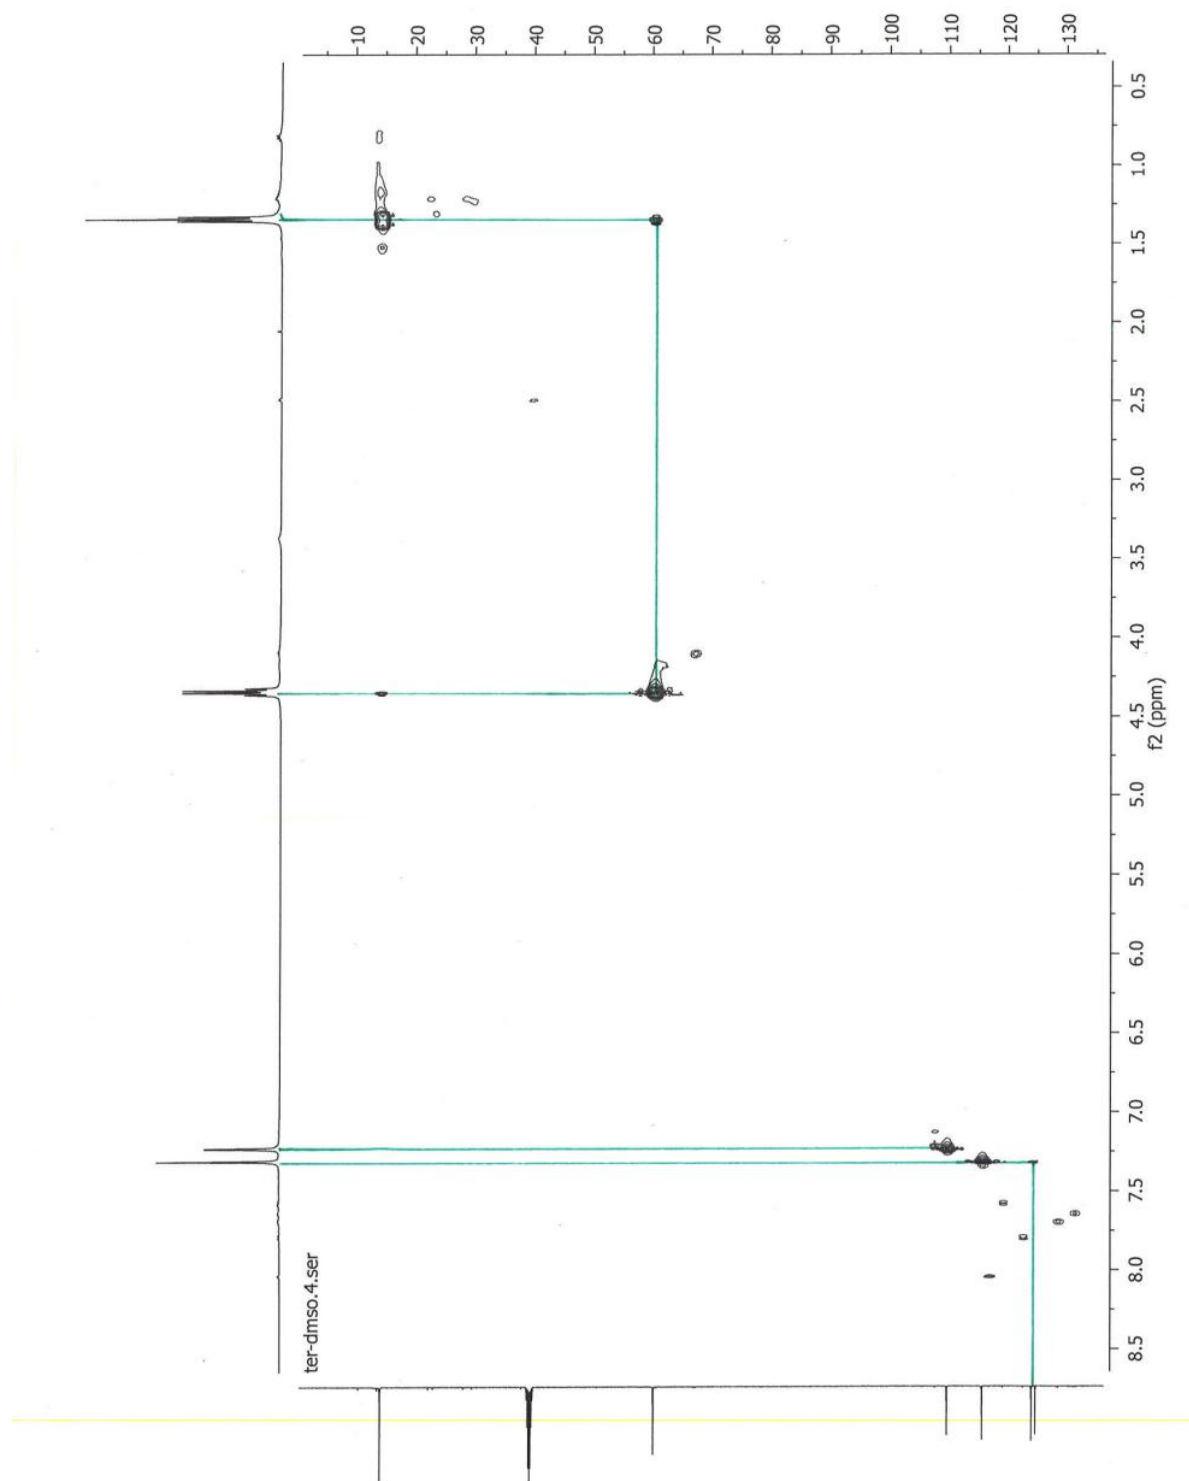

$^1\text{H}$ - $^{13}\text{C}$  HMBC:

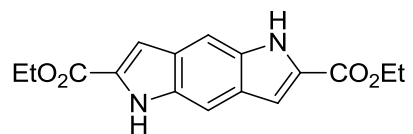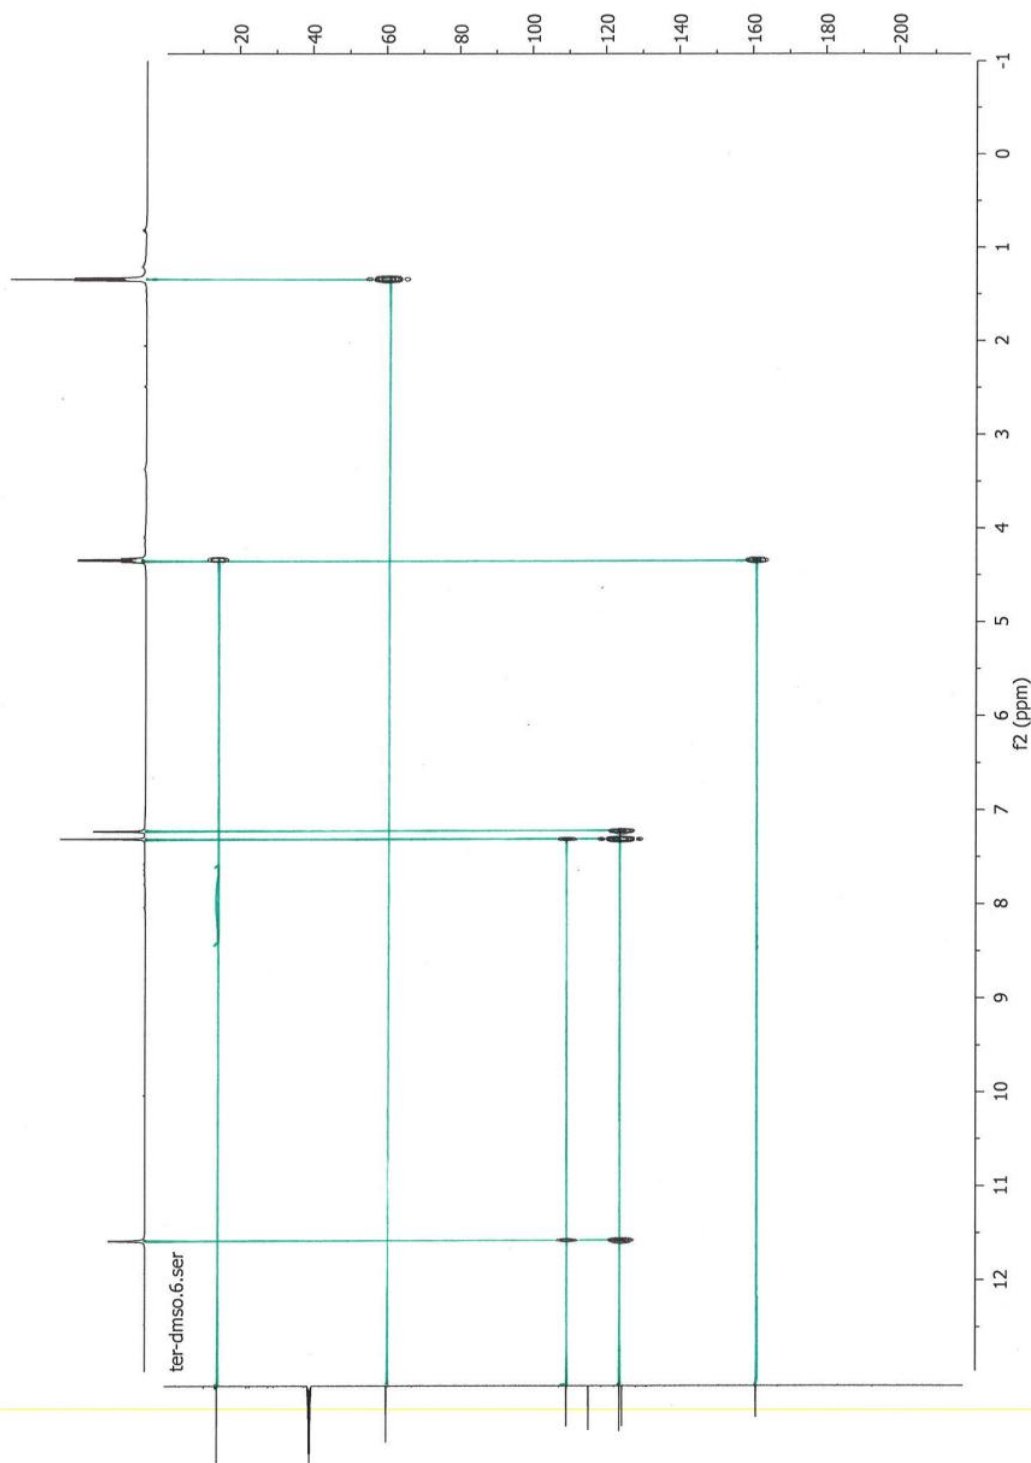

## Section 4:

### Differential Scanning Calorimetry of ethyl azidoacetate (1) and ethyl $\alpha$ -azido- $\beta$ -arylacrylates (2a-2j)

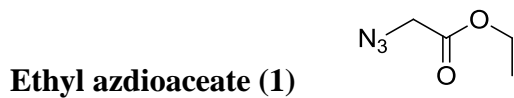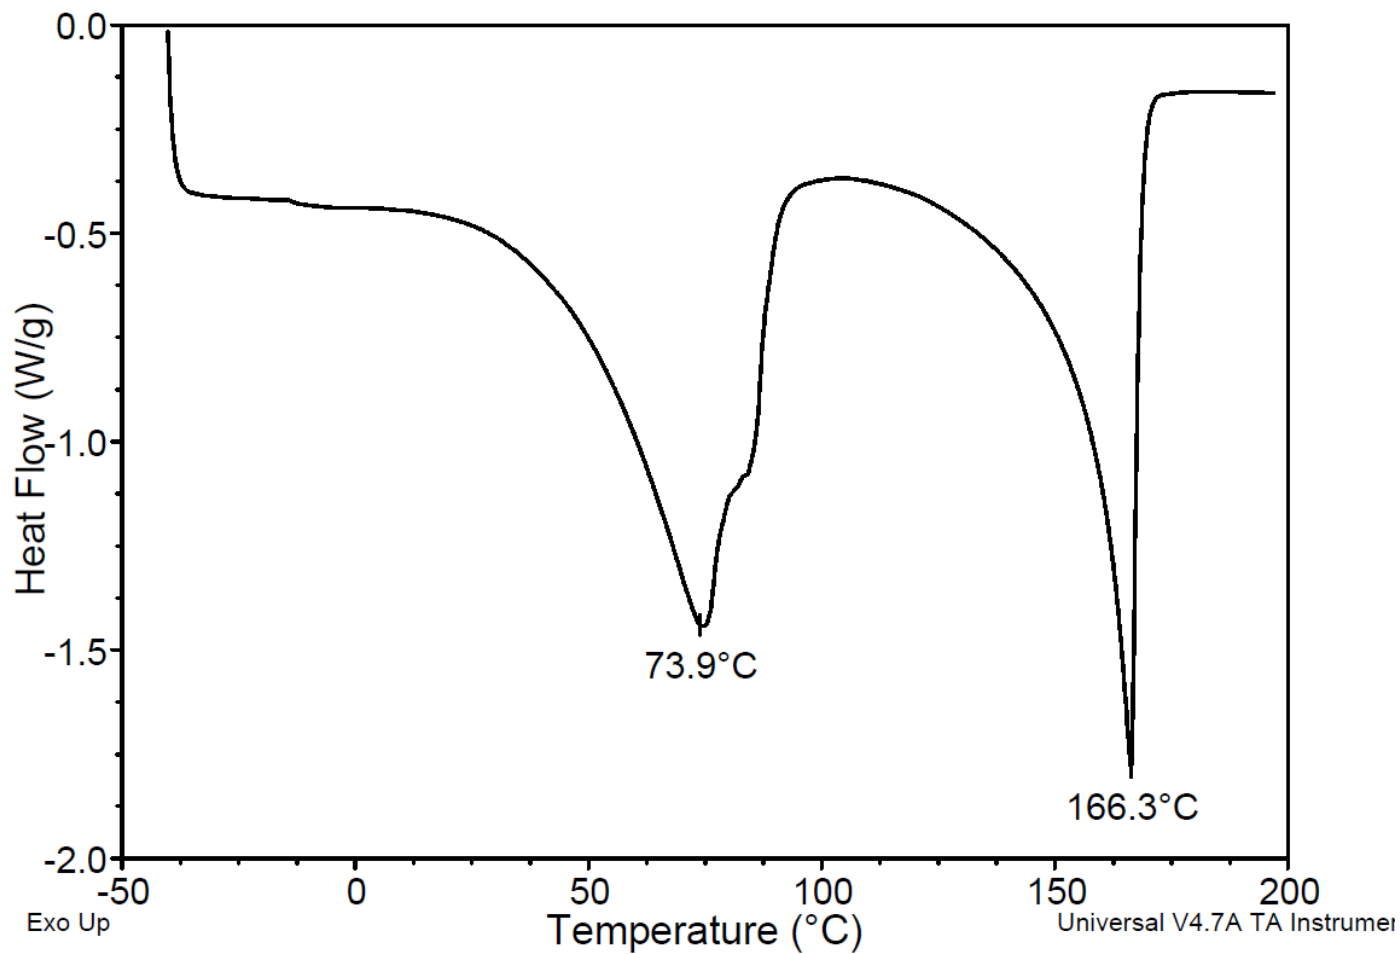



**(Z)-Ethyl  $\alpha$ -azido- $\beta$ -phenylacrylate (2a)**

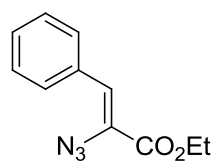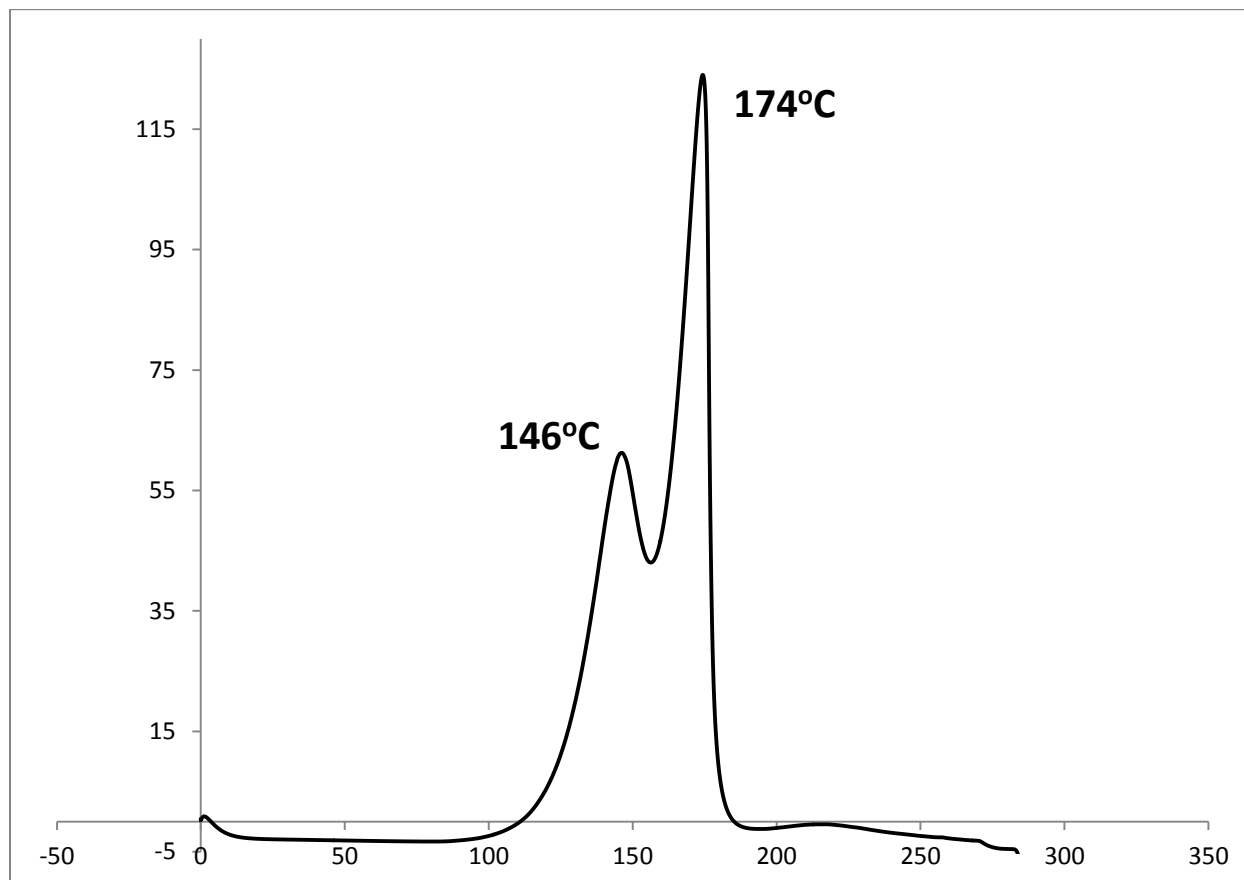

**(Z)-Ethyl *meta*-methyl- $\alpha$ -azido- $\beta$ -phenylacrylate (2b)**

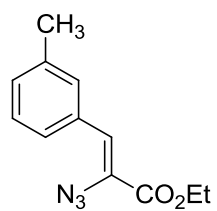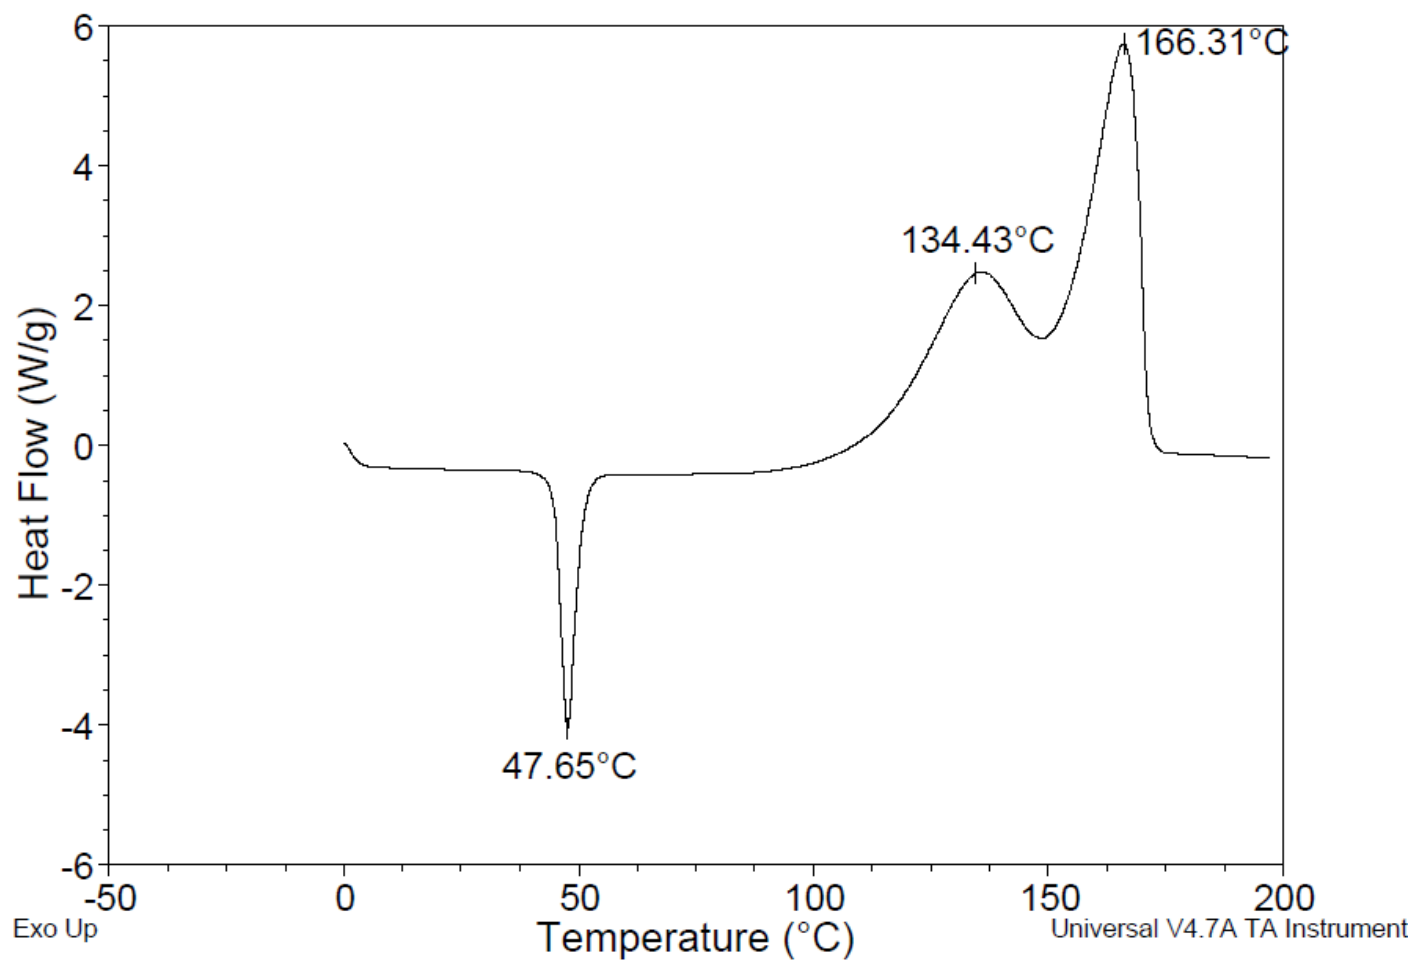

**(Z)-Ethyl *meta*-methoxy- $\alpha$ -azido- $\beta$ -phenylacrylate (2c)**

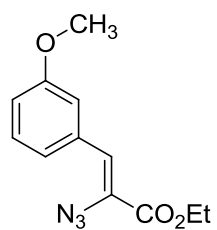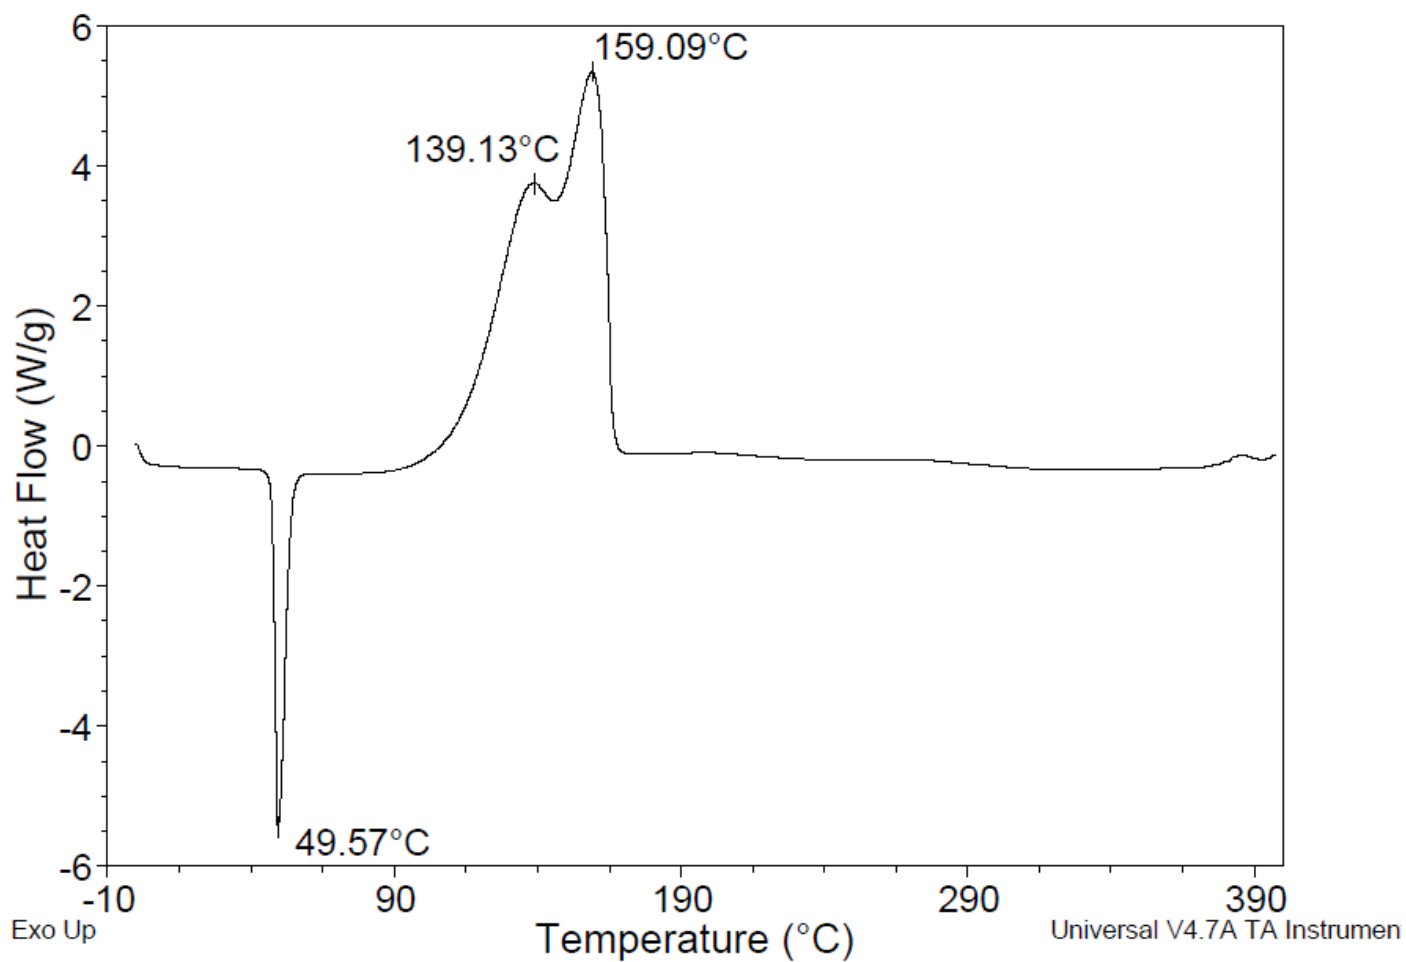

**(Z)-Ethyl *meta*-chloro- $\alpha$ -azido- $\beta$ -phenylacrylate (2d)**

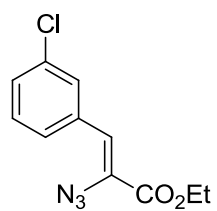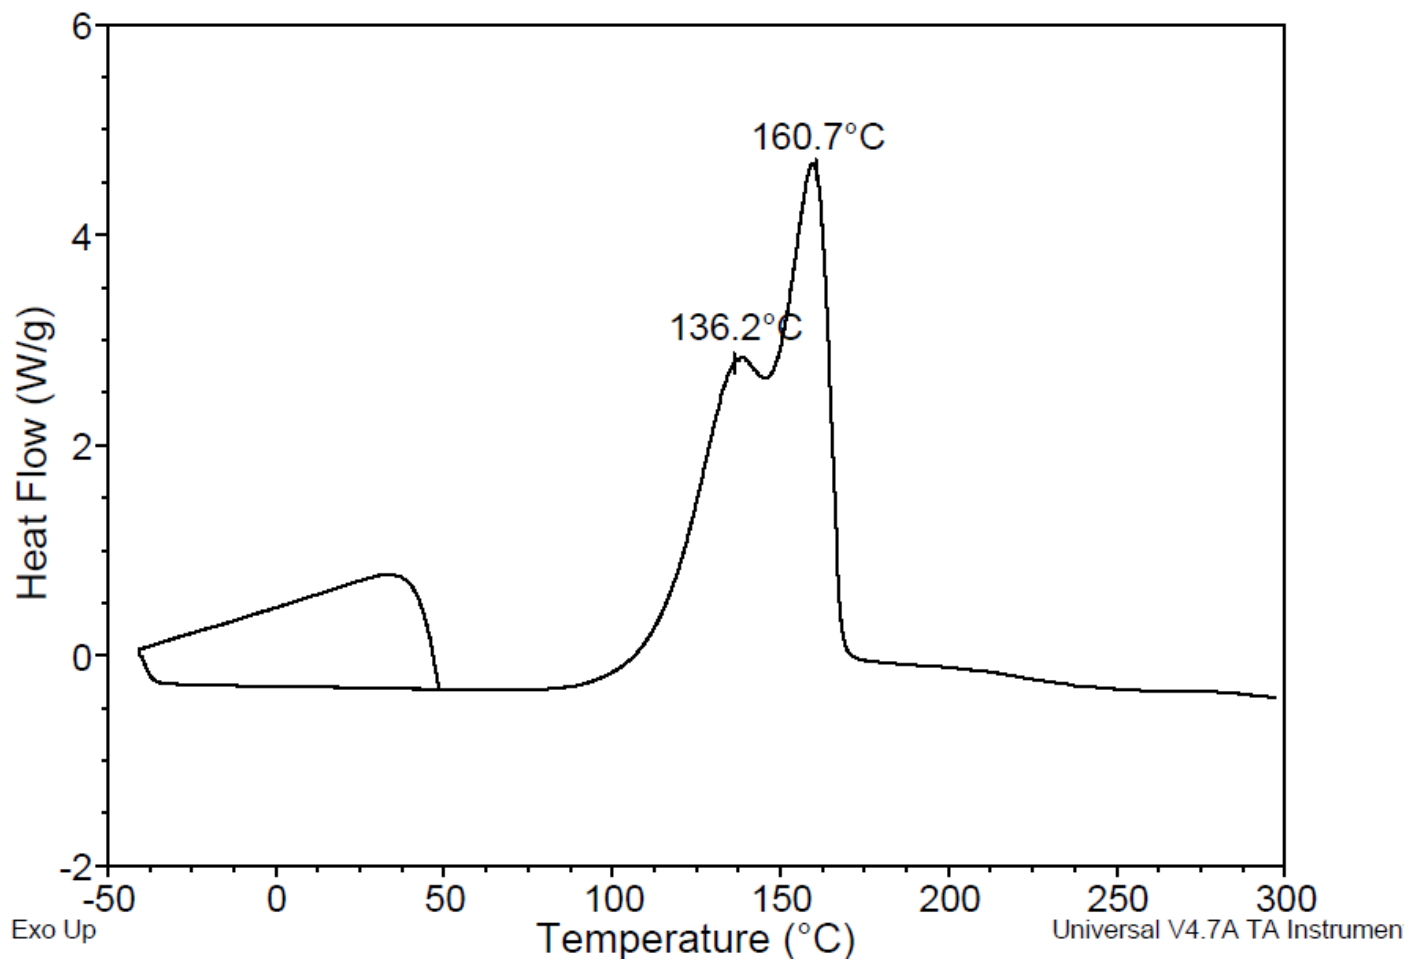

**(Z)-Ethyl *meta*-phenyl- $\alpha$ -azido- $\beta$ -phenylacrylate (2e)**

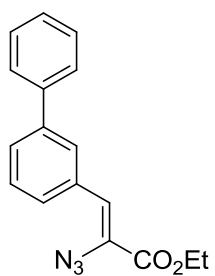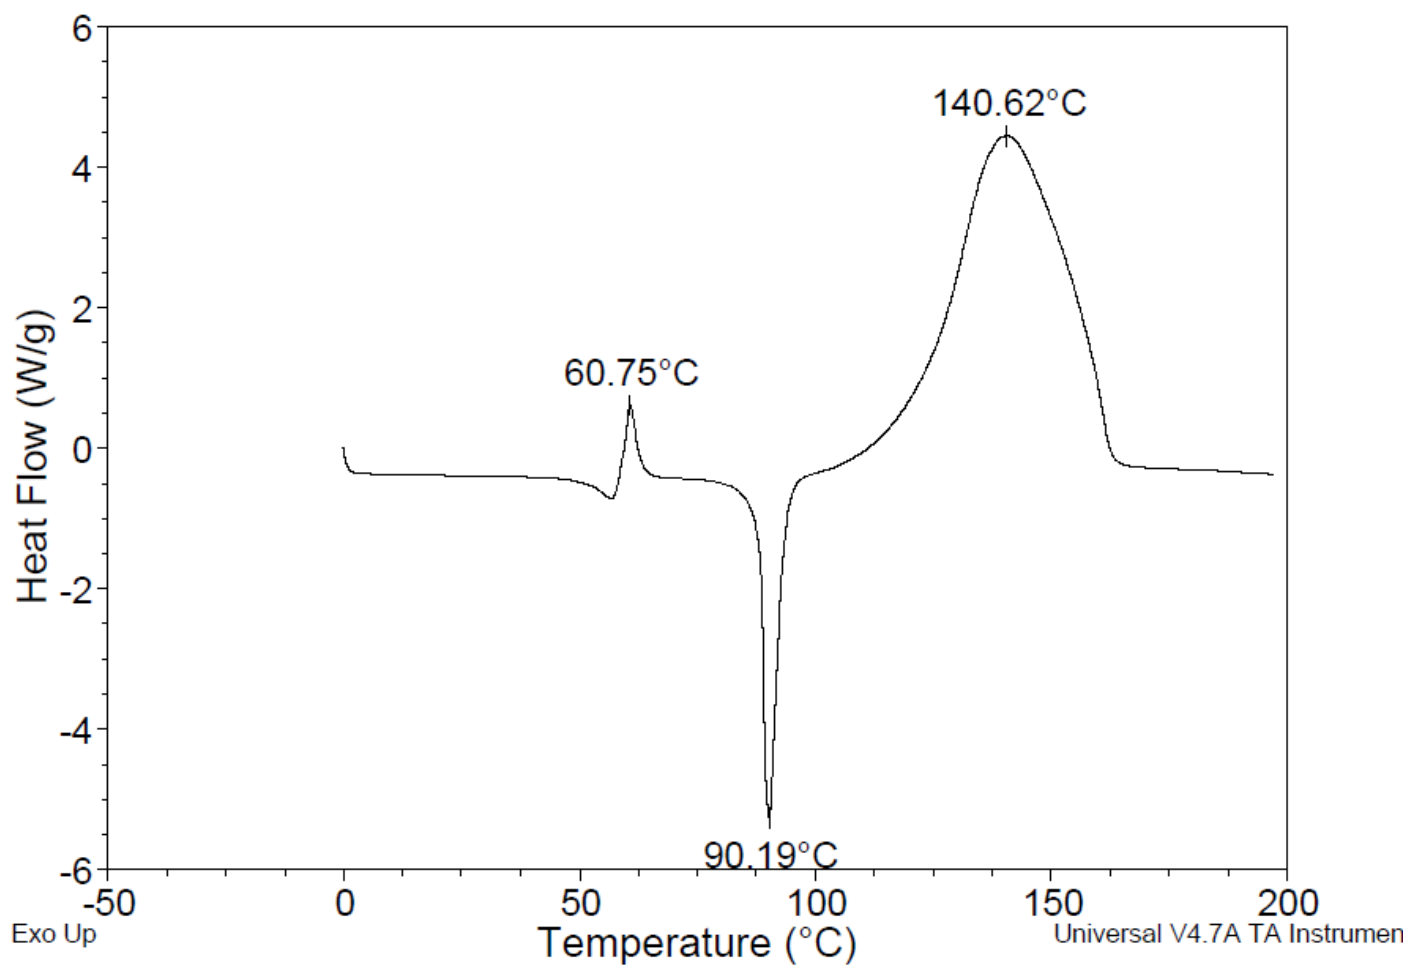

**(Z)-Ethyl *meta*-nitro- $\alpha$ -azido- $\beta$ -phenylacrylate (2f)**

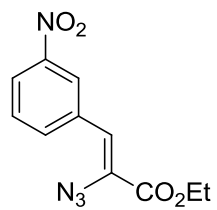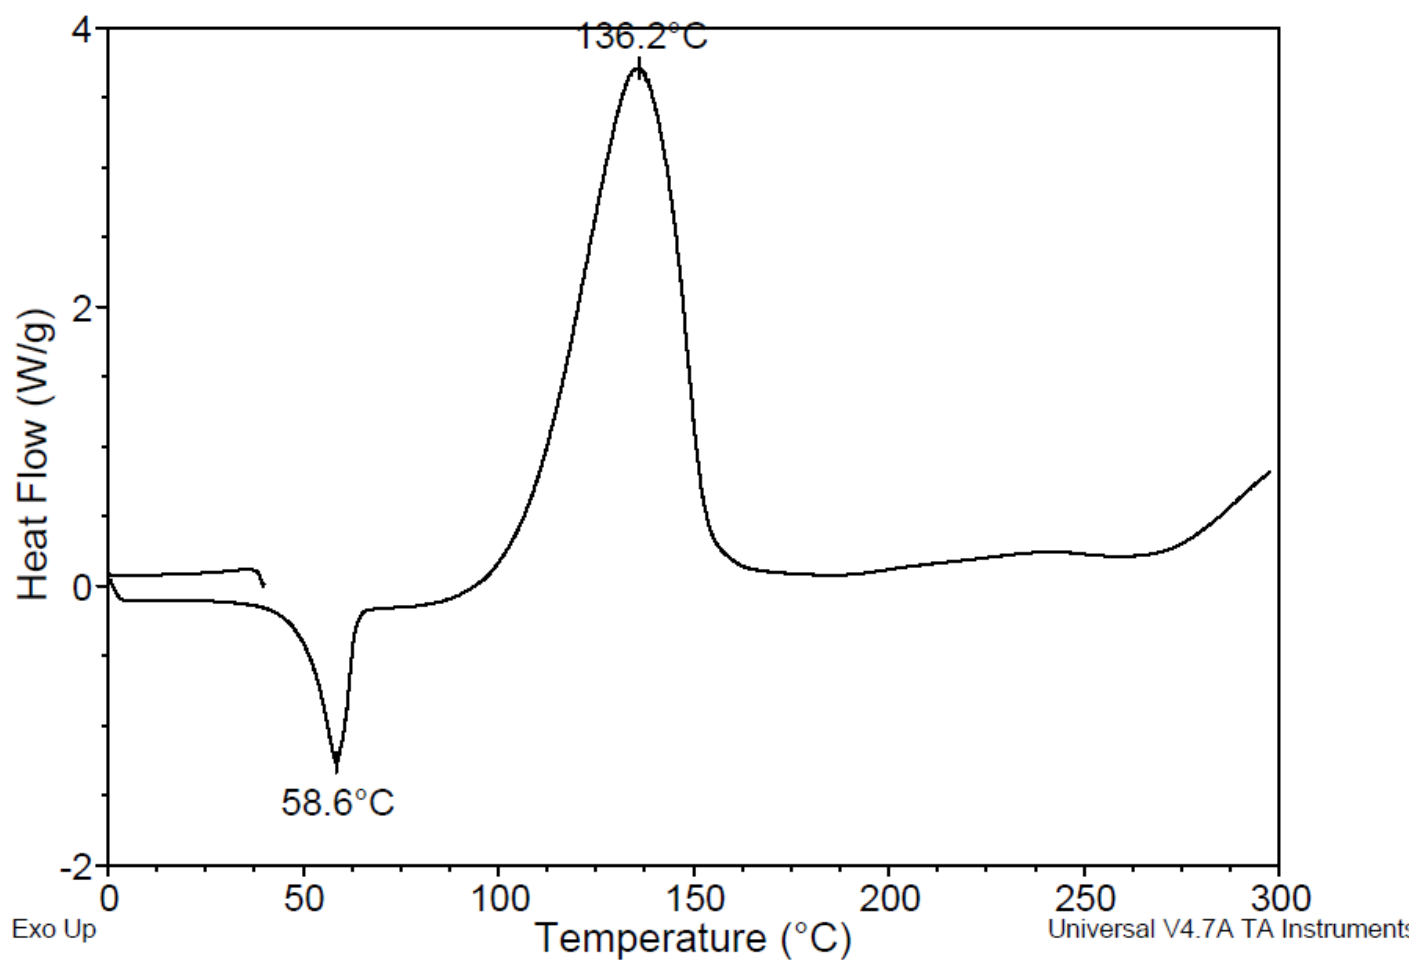

**(Z)-Ethyl *para*-methyl- $\alpha$ -azido- $\beta$ -phenylacrylate (2g)**

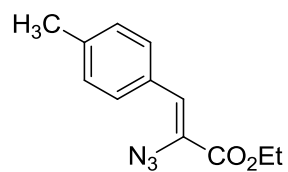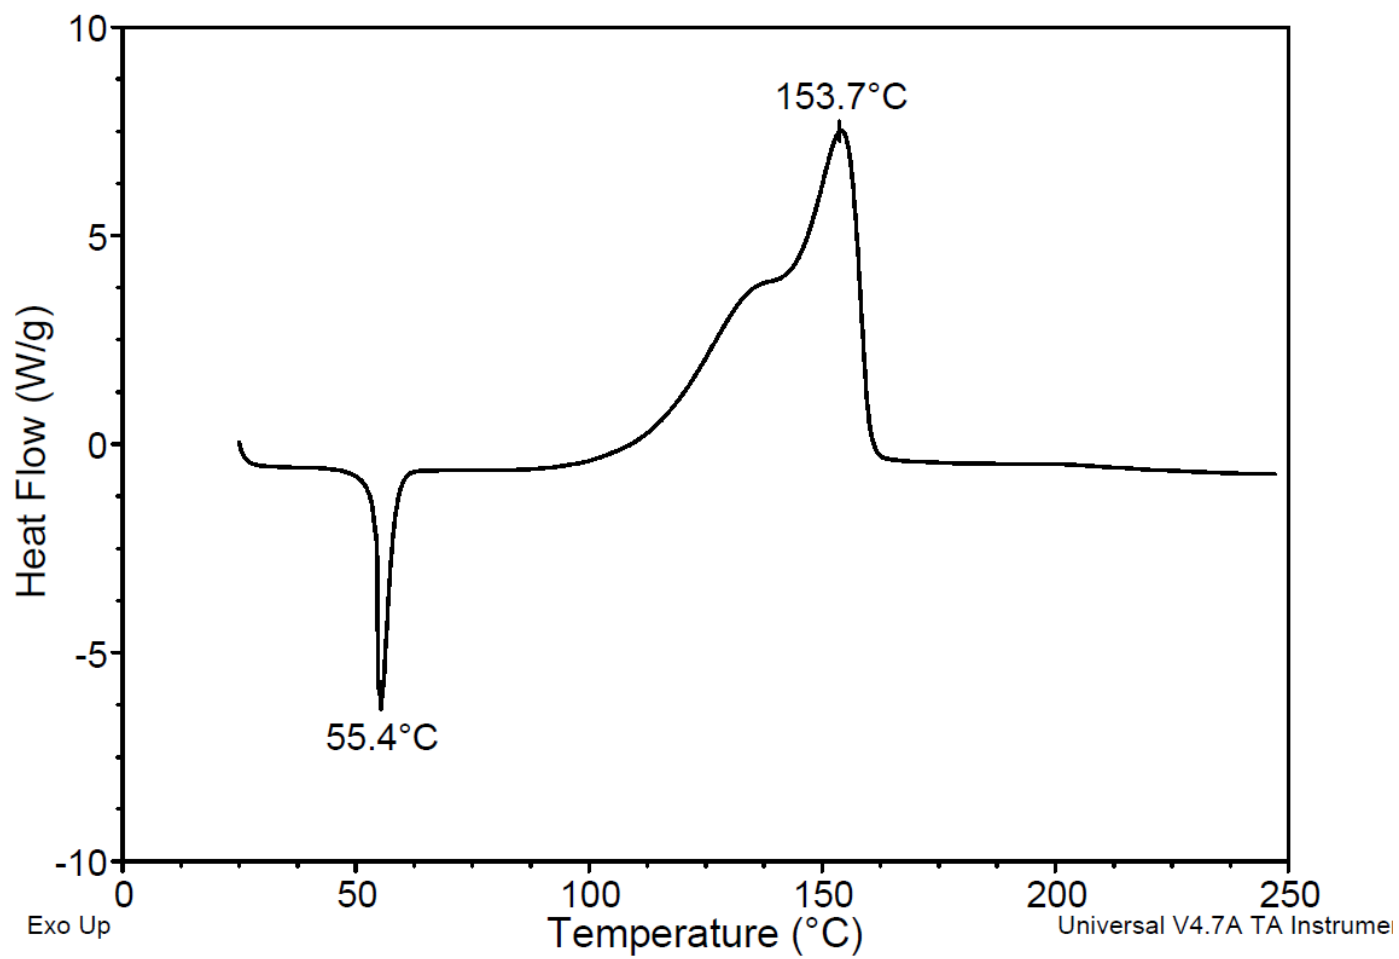

**(2Z,2'Z)-diethyl 3,3'-(1,3-phenylene)bis(2-azidoacrylate) (2h)**

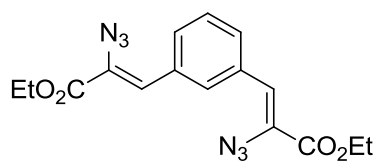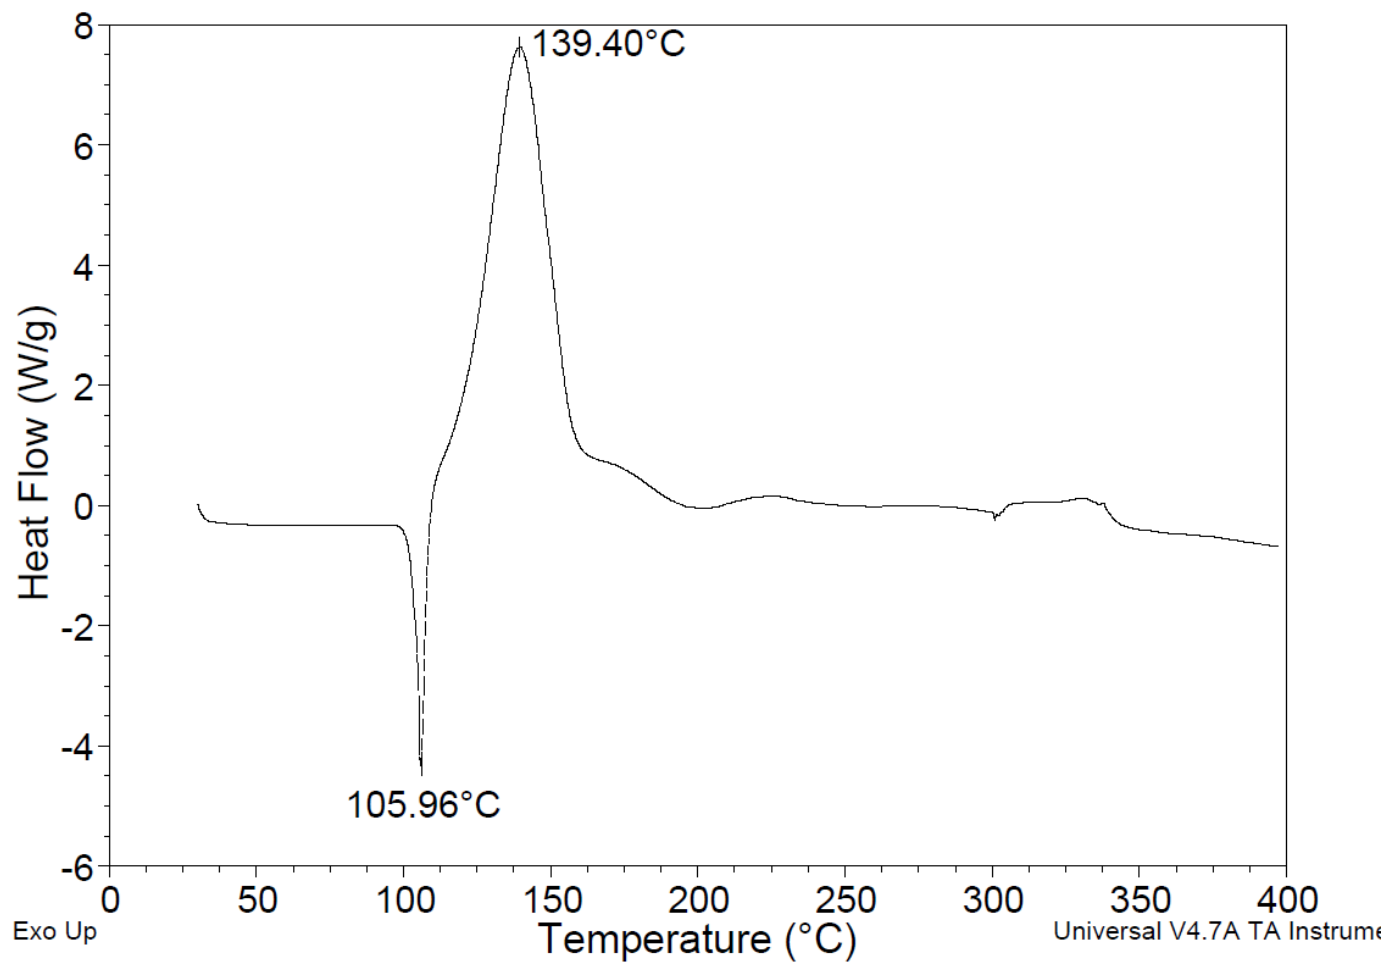



**(2Z,2'Z)-diethyl 3,3'-(1,4-phenylene)bis(2-azidoacrylate) (2i)**

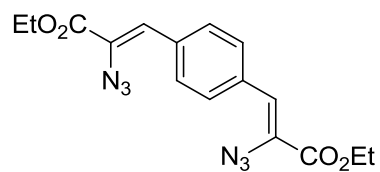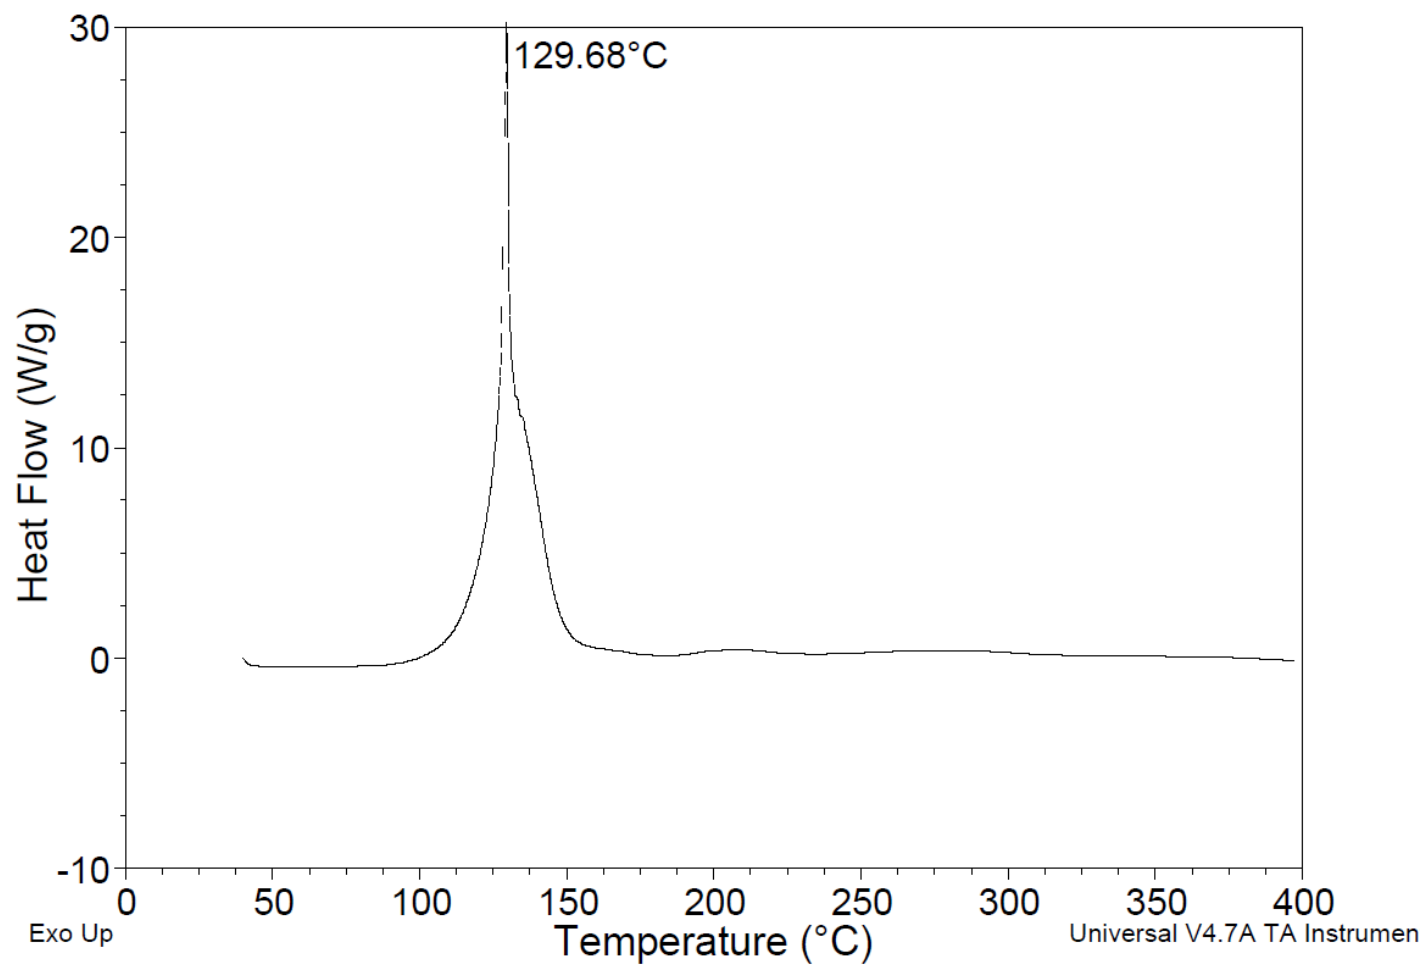

**(Z)-ethyl 2-azido-3-(furan-2-yl)acrylate (2j)**

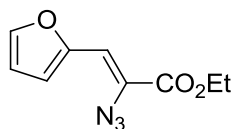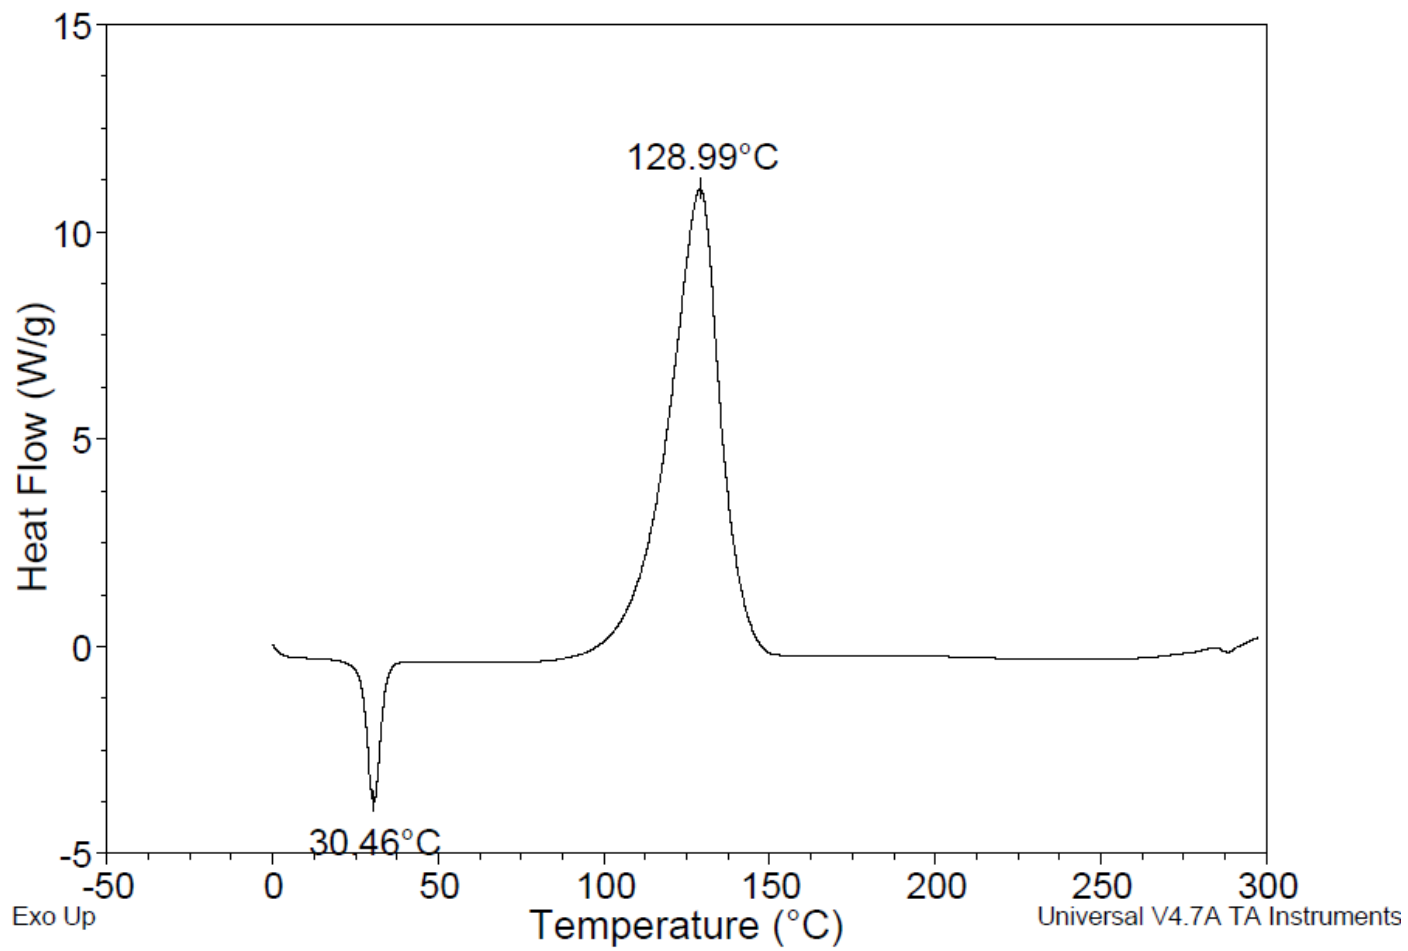

Supplement: c3ra42296h.pdf [file c3ra42296h.pdf]
